# Supplementary material
Source: publisher site journal article supplement (https://www.dovepress.com/article/496138)
Supplement: Supplementary file 1 [file get_supplementary_file.php]

| Patients | Sex | Age | Diagnosis | Immunofluorescent changes | Morphological changes | Blood pressure  SP/DP (mmHg) | Hematuria  RBC count/microliter urine | Proteinuria  mAlb/Cr (mg/g) | Serum creatinine  (μmol/L) |
| --- | --- | --- | --- | --- | --- | --- | --- | --- | --- |
| 1 | Female | 17 | IgAN | IgA+, IgM+ | Mild mesangial hypercellularity and ECM expansion | 107/70 | 375 | 1961.2 | 87 |
| 2 | Male | 41 | IgAN | IgA+, C3++ | Mild mesangial hypercellularity and ECM expansion, diffuse foot process fusion | 109/74 | 412 | 1319.1 | 91 |
| 3 | Female | 21 | IgAN | IgG++, IgA++, IgM++, C3++ | Mild mesangial hypercellularity and ECM expansion, diffuse foot process fusion | 114/75 | 824 | 897.1 | 56 |
| 4 | Female | 30 | IgAN | IgA++, IgM+, C3+++ | Mild mesangial hypercellularity and ECM expansion, segmental foot process fusion | 112/72 | 178 | 512 | 72 |
| 5 | Female | 33 | IgAN | IgA+++, C3++ | Mild mesangial hypercellularity and ECM expansion, segmental foot process fusion | 160/112 | 4046 | 3007.9 | 71 |
| 6 | Male | 31 | IgAN | IgA++, C3++ | Mild mesangial hypercellularity and ECM expansion | 174/103 | 253 | 238.1 | 79 |
| 7 | Male | 28 | IgAN | IgG+, IgA+++, C3++ | Mild mesangial hypercellularity and ECM expansion, segmental foot process fusion | 132/67 | 363 | 437.9 | 115 |
| 8 | Female | 23 | IgAN | IgA+++, IgM++ | Mild mesangial hypercellularity and ECM expansion, segmental foot process fusion | 140/87 | 457 | 2610.3 | 109 |
| 9 | Male | 35 | IgAN | IgA+++, C3++, IgM+++ | Mild mesangial hypercellularity and ECM expansion, segmental foot process fusion | 125/78 | 274 | 207.1 | 73 |
| 10 | Female | 23 | IgAN | IgA++, IgM+, C3+ | Mild mesangial hypercellularity and ECM expansion, diffuse foot process fusion | 131/85 | 541 | 140.2 | 58 |
| 11 | Female | 49 | LN | IgA++, IgM+, C3+++ | Mild mesangial hypercellularity and ECM expansion, diffuse foot process fusion | 100/61 | 262 | 373.5 | 74 |
| 12 | Female | 24 | LN | IgA+++, IgM++, C3+++ | Mild mesangial hypercellularity and ECM expansion, segmental foot process fusion | 150/100 | 812 | 1466.2 | 57 |
| 13 | Female | 42 | LN | IgA++, IgM++, C3+++ | Mild mesangial hypercellularity and ECM expansion, diffuse foot process fusion | 118/67 | 182 | 2236.9 | 96 |
| 14 | Female | 61 | LN | IgG++, IgA++, IgM+, C3+++ | Mild mesangial hypercellularity and ECM expansion, diffuse foot process fusion | 134/87 | 194 | 1703.3 | 45 |
| 15 | Female | 61 | LN | IgA++, IgM+, C3++++ | Mild mesangial hypercellularity and ECM expansion, diffuse foot process fusion | 158/90 | 100 | 2802.7 | 93 |
| 16 | Female | 37 | LN | IgG+++, IgA++, C3+++ | Mild mesangial hypercellularity and ECM expansion, diffuse foot process fusion | 116/82 | 149 | 1949.1 | 64 |
| 17 | Female | 26 | LN | IgG+++, IgA+++, IgM+++, C3+ | Mild mesangial hypercellularity and ECM expansion, diffuse foot process fusion | 131/89 | 129 | 1563.7 | 71 |
| 18 | Female | 45 | LN | IgG++, IgA+, IgM++, C3++ | Mild mesangial hypercellularity and ECM expansion, segmental foot process | 117/78 | 937 | 1310.0 | 58 |

**Supplementary Table 1. IgAN and LN patients with similar pathological changes included for validation of the predicting models by IHC**

SP=Systolic Pressure; DP=Diastolic Pressure; RBC=Red Blood Cell; mAlb/Cr=microAlbumin/Creatinine; ECM=ExtraCellular Matrix

| Series code | Series GEO accession | Series type | Number of included samples | Group | Organism | Series platform ID |
| --- | --- | --- | --- | --- | --- | --- |
| G1 | GSE99339 | Expression profiling by array | 56 | IgAN(n=26)  LN(n=30) | Homo sapiens | [GPL19109](https://www.ncbi.nlm.nih.gov/geo/query/acc.cgi?acc=GPL19109)  and [GPL19184](https://www.ncbi.nlm.nih.gov/geo/query/acc.cgi?acc=GPL19184) |
| G2 | GSE93798 | Expression profiling by array | 22 | HC(n=22) | Homo sapiens | [GPL22945](https://www.ncbi.nlm.nih.gov/geo/query/acc.cgi?acc=GPL22945) |

**Supplementary Table 2.** Characteristics of the GSE99339 and GSE93798 datasets.

| Category | Genesymbol | Description |
| --- | --- | --- |
| up-regulated DEGs only in IgAN | FST | follistatin |
|  | RCC1 | regulator of chromosome condensation 1 |
|  | CD74 | CD74 molecule |
|  | TUBB | tubulin beta class I |
|  | NONO | non-POU domain containing octamer binding |
|  | ARPC4 | actin related protein 2/3 complex subunit 4 |
|  | EXO1 | exonuclease 1 |
|  | MAP3K6 | mitogen-activated protein kinase kinase kinase 6 |
|  | STIP1 | stress induced phosphoprotein 1 |
|  | UBE2Z | ubiquitin conjugating enzyme E2 Z |
|  | GNAI2 | G protein subunit alpha i2 |
|  | KDM1A | lysine demethylase 1A |
|  | ID1 | inhibitor of DNA binding 1, HLH protein |
|  | PPP1CA | protein phosphatase 1 catalytic subunit alpha |
|  | BIRC5 | baculoviral IAP repeat containing 5 |
|  | NAP1L4 | nucleosome assembly protein 1 like 4 |
|  | RHOB | ras homolog family member B |
|  | CDC25A | cell division cycle 25A |
|  | PPP4C | protein phosphatase 4 catalytic subunit |
|  | ZC3H4 | zinc finger CCCH-type containing 4 |
|  | LGALS9 | galectin 9 |
|  | SOX10 | SRY-box transcription factor 10 |
|  | RTF1 | RTF1 homolog, Paf1/RNA polymerase II complex component |
|  | MAST1 | microtubule associated serine/threonine kinase 1 |
|  | SAFB | scaffold attachment factor B |
|  | GID8 | GID complex subunit 8 homolog |
|  | FKBP10 | FKBP prolyl isomerase 10 |
|  | ELAVL1 | ELAV like RNA binding protein 1 |
|  | UBE2M | ubiquitin conjugating enzyme E2 M |
|  | EDEM2 | ER degradation enhancing alpha-mannosidase like protein 2 |
|  | DARS2 | aspartyl-tRNA synthetase 2, mitochondrial |
|  | PSMB3 | proteasome 20S subunit beta 3 |
|  | HNRNPH1 | heterogeneous nuclear ribonucleoprotein H1 |
|  | KLF2 | Kruppel like factor 2 |
|  | PTGIR | prostaglandin I2 receptor |
|  | PKM | pyruvate kinase M1/2 |
|  | KHSRP | KH-type splicing regulatory protein |
|  | ENG | endoglin |
|  | SNRNP40 | small nuclear ribonucleoprotein U5 subunit 40 |
|  | RHPN1-AS1 | RHPN1 antisense RNA 1 (head to head) |
|  | ECE1 | endothelin converting enzyme 1 |
|  | SLC9A3R2 | SLC9A3 regulator 2 |
|  | RHOC | ras homolog family member C |
|  | TMEM248 | transmembrane protein 248 |
|  | GTF3C4 | general transcription factor IIIC subunit 4 |
|  | CAPRIN1 | cell cycle associated protein 1 |
|  | TSPAN14 | tetraspanin 14 |
|  | NR2E1 | nuclear receptor subfamily 2 group E member 1 |
|  | AFP | alpha fetoprotein |
|  | PLEKHM2 | pleckstrin homology and RUN domain containing M2 |
|  | RIN3 | Ras and Rab interactor 3 |
|  | SMU1 | SMU1 DNA replication regulator and spliceosomal factor |
|  | IL17RC | interleukin 17 receptor C |
|  | UGT2B15 | UDP glucuronosyltransferase family 2 member B15 |
|  | TCF7 | transcription factor 7 |
|  | IL3RA | interleukin 3 receptor subunit alpha |
|  | CLDN6 | claudin 6 |
|  | ZBED1 | zinc finger BED-type containing 1 |
|  | TMED2 | transmembrane p24 trafficking protein 2 |
|  | PRRX1 | paired related homeobox 1 |
|  | NOLC1 | nucleolar and coiled-body phosphoprotein 1 |
|  | MAD1L1 | mitotic arrest deficient 1 like 1 |
|  | DIXDC1 | DIX domain containing 1 |
|  | CENPO | centromere protein O |
|  | FYCO1 | FYVE and coiled-coil domain autophagy adaptor 1 |
|  | NOS2 | nitric oxide synthase 2 |
|  | CD46 | CD46 molecule |
|  | PTPN18 | protein tyrosine phosphatase non-receptor type 18 |
|  | E2F4 | E2F transcription factor 4 |
|  | SH2D1A | SH2 domain containing 1A |
|  | RASIP1 | Ras interacting protein 1 |
|  | XRCC2 | X-ray repair cross complementing 2 |
|  | TIAM1 | TIAM Rac1 associated GEF 1 |
|  | GTSE1 | G2 and S-phase expressed 1 |
|  | TGM2 | transglutaminase 2 |
|  | SUPT16H | SPT16 homolog, facilitates chromatin remodeling subunit |
|  | CHD8 | chromodomain helicase DNA binding protein 8 |
|  | BAZ1B | bromodomain adjacent to zinc finger domain 1B |
|  | GDF3 | growth differentiation factor 3 |
|  | NAP1L1 | nucleosome assembly protein 1 like 1 |
|  | BEST1 | bestrophin 1 |
|  | THOC6 | THO complex 6 |
|  | DLX2 | distal-less homeobox 2 |
|  | RAMP2 | receptor activity modifying protein 2 |
|  | EZR | ezrin |
|  | PIP4K2A | phosphatidylinositol-5-phosphate 4-kinase type 2 alpha |
|  | SLC7A11 | solute carrier family 7 member 11 |
|  | PFN1 | profilin 1 |
|  | ROCK2 | Rho associated coiled-coil containing protein kinase 2 |
|  | DPF2 | double PHD fingers 2 |
|  | GAL | galanin and GMAP prepropeptide |
|  | FGL1 | fibrinogen like 1 |
|  | CRABP2 | cellular retinoic acid binding protein 2 |
|  | SEPTIN9 | septin 9 |
|  | MAGEA10 | MAGE family member A10 |
|  | CD82 | CD82 molecule |
|  | MCM4 | minichromosome maintenance complex component 4 |
|  | NFYC | nuclear transcription factor Y subunit gamma |
|  | CXXC4 | CXXC finger protein 4 |
|  | OR1F1 | olfactory receptor family 1 subfamily F member 1 |
|  | GCGR | glucagon receptor |
|  | ARHGAP45 | Rho GTPase activating protein 45 |
|  | MYOD1 | myogenic differentiation 1 |
|  | SIPA1 | signal-induced proliferation-associated 1 |
|  | RUVBL2 | RuvB like AAA ATPase 2 |
|  | ACTB | actin beta |
|  | BCL2L1 | BCL2 like 1 |
|  | MMP17 | matrix metallopeptidase 17 |
|  | IPO8 | importin 8 |
|  | IGFBP4 | insulin like growth factor binding protein 4 |
|  | GOLGA5 | golgin A5 |
|  | FXYD3 | FXYD domain containing ion transport regulator 3 |
|  | COPA | COPI coat complex subunit alpha |
|  | IGFBP5 | insulin like growth factor binding protein 5 |
|  | NUDT21 | nudix hydrolase 21 |
|  | SNAI2 | snail family transcriptional repressor 2 |
|  | PSMC3 | proteasome 26S subunit, ATPase 3 |
|  | OXA1L | OXA1L mitochondrial inner membrane protein |
|  | SIX6 | SIX homeobox 6 |
|  | STAB1 | stabilin 1 |
|  | DGKZ | diacylglycerol kinase zeta |
|  | SREBF2 | sterol regulatory element binding transcription factor 2 |
|  | MDK | midkine |
|  | PDK4 | pyruvate dehydrogenase kinase 4 |
|  | ACAN | aggrecan |
|  | RALY | RALY heterogeneous nuclear ribonucleoprotein |
|  | PRKY | protein kinase Y-linked (pseudogene) |
|  | KAT2A | lysine acetyltransferase 2A |
|  | SRRM1 | serine and arginine repetitive matrix 1 |
|  | BAHCC1 | BAH domain and coiled-coil containing 1 |
|  | ARFGAP2 | ADP ribosylation factor GTPase activating protein 2 |
|  | ARAP3 | ArfGAP with RhoGAP domain, ankyrin repeat and PH domain 3 |
|  | SRSF4 | serine and arginine rich splicing factor 4 |
|  | SS18 | SS18 subunit of BAF chromatin remodeling complex |
|  | MTA2 | metastasis associated 1 family member 2 |
|  | RFXANK | regulatory factor X associated ankyrin containing protein |
|  | TMEM204 | transmembrane protein 204 |
|  | PRCC | proline rich mitotic checkpoint control factor |
|  | SLC1A5 | solute carrier family 1 member 5 |
|  | GATA1 | GATA binding protein 1 |
|  | ALDH18A1 | aldehyde dehydrogenase 18 family member A1 |
|  | WDR46 | WD repeat domain 46 |
|  | PPP1R10 | protein phosphatase 1 regulatory subunit 10 |
|  | RBM14 | RNA binding motif protein 14 |
|  | ACTG2 | actin gamma 2, smooth muscle |
|  | DAXX | death domain associated protein |
|  | SMARCC1 | SWI/SNF related, matrix associated, actin dependent regulator of chromatin subfamily c member 1 |
|  | CCNP | cyclin P |
|  | SAP30 | Sin3A associated protein 30 |
|  | SLC45A2 | solute carrier family 45 member 2 |
|  | CPN1 | carboxypeptidase N subunit 1 |
|  | STOML2 | stomatin like 2 |
|  | PTPRF | protein tyrosine phosphatase receptor type F |
|  | KLF15 | Kruppel like factor 15 |
|  | TRPM2 | transient receptor potential cation channel subfamily M member 2 |
|  | RAD51 | RAD51 recombinase |
|  | INTS14 | integrator complex subunit 14 |
|  | PAX6 | paired box 6 |
|  | ACIN1 | apoptotic chromatin condensation inducer 1 |
|  | MAN2A1 | mannosidase alpha class 2A member 1 |
|  | PLXND1 | plexin D1 |
|  | PRPF6 | pre-mRNA processing factor 6 |
|  | SLC19A1 | solute carrier family 19 member 1 |
|  | SLC8B1 | solute carrier family 8 member B1 |
|  | CHCHD2 | coiled-coil-helix-coiled-coil-helix domain containing 2 |
|  | WDR70 | WD repeat domain 70 |
|  | MPRIP | myosin phosphatase Rho interacting protein |
|  | SLC25A40 | solute carrier family 25 member 40 |
|  | CA14 | carbonic anhydrase 14 |
|  | FAM111A | FAM111 trypsin like peptidase A |
|  | MCHR1 | melanin concentrating hormone receptor 1 |
|  | MAPK11 | mitogen-activated protein kinase 11 |
|  | FKBP4 | FKBP prolyl isomerase 4 |
|  | EPHB4 | EPH receptor B4 |
|  | CPLX3 | complexin 3 |
|  | PCGF3 | polycomb group ring finger 3 |
|  | NR6A1 | nuclear receptor subfamily 6 group A member 1 |
|  | GLE1 | GLE1 RNA export mediator |
|  | SARS1 | seryl-tRNA synthetase 1 |
|  | CRH | corticotropin releasing hormone |
|  | MAP6D1 | MAP6 domain containing 1 |
|  | BCAS1 | brain enriched myelin associated protein 1 |
|  | FARSA | phenylalanyl-tRNA synthetase subunit alpha |
|  | RBM38 | RNA binding motif protein 38 |
|  | HIRIP3 | HIRA interacting protein 3 |
|  | MRPS12 | mitochondrial ribosomal protein S12 |
|  | SETD5 | SET domain containing 5 |
|  | PPM1F | protein phosphatase, Mg2+/Mn2+ dependent 1F |
|  | PFDN5 | prefoldin subunit 5 |
|  | SRPK2 | SRSF protein kinase 2 |
|  | NFRKB | nuclear factor related to kappaB binding protein |
|  | ZNF74 | zinc finger protein 74 |
|  | PYCR1 | pyrroline-5-carboxylate reductase 1 |
|  | NUP62 | nucleoporin 62 |
|  | NRBP1 | nuclear receptor binding protein 1 |
|  | SETMAR | SET domain and mariner transposase fusion gene |
|  | BRCA1 | BRCA1 DNA repair associated |
|  | HBQ1 | hemoglobin subunit theta 1 |
|  | TINAGL1 | tubulointerstitial nephritis antigen like 1 |
|  | GTPBP2 | GTP binding protein 2 |
|  | MKS1 | MKS transition zone complex subunit 1 |
|  | RTN3 | reticulon 3 |
|  | SMPDL3B | sphingomyelin phosphodiesterase acid like 3B |
|  | CWF19L1 | CWF19 like cell cycle control factor 1 |
|  | CNN2 | calponin 2 |
|  | CCKAR | cholecystokinin A receptor |
|  | ZNF654 | zinc finger protein 654 |
|  | ZCCHC14 | zinc finger CCHC-type containing 14 |
|  | SEMA6C | semaphorin 6C |
|  | NDUFV1 | NADH:ubiquinone oxidoreductase core subunit V1 |
|  | PRKD3 | protein kinase D3 |
|  | TRABD | TraB domain containing |
|  | FDFT1 | farnesyl-diphosphate farnesyltransferase 1 |
|  | GTF2I | general transcription factor IIi |
|  | SCN5A | sodium voltage-gated channel alpha subunit 5 |
|  | MCOLN1 | mucolipin TRP cation channel 1 |
|  | SMO | smoothened, frizzled class receptor |
|  | ZBTB22 | zinc finger and BTB domain containing 22 |
|  | MDFI | MyoD family inhibitor |
|  | ADD1 | adducin 1 |
|  | SH3BP2 | SH3 domain binding protein 2 |
|  | SNAI1 | snail family transcriptional repressor 1 |
|  | MAPK14 | mitogen-activated protein kinase 14 |
|  | BMPR2 | bone morphogenetic protein receptor type 2 |
|  | PDE1B | phosphodiesterase 1B |
|  | POGZ | pogo transposable element derived with ZNF domain |
|  | NPTX1 | neuronal pentraxin 1 |
|  | CCNF | cyclin F |
|  | GAS2L1 | growth arrest specific 2 like 1 |
|  | RAB5C | RAB5C, member RAS oncogene family |
|  | BTNL2 | butyrophilin like 2 |
|  | NEUROG1 | neurogenin 1 |
|  | DOCK6 | dedicator of cytokinesis 6 |
|  | TGFB1 | transforming growth factor beta 1 |
|  | TPM4 | tropomyosin 4 |
|  | GRTP1 | growth hormone regulated TBC protein 1 |
|  | DNAJC7 | DnaJ heat shock protein family (Hsp40) member C7 |
|  | SNCAIP | synuclein alpha interacting protein |
|  | TPSD1 | tryptase delta 1 |
|  | CDK9 | cyclin dependent kinase 9 |
|  | RGR | retinal G protein coupled receptor |
|  | ZBP1 | Z-DNA binding protein 1 |
|  | PGC | progastricsin |
|  | MAT1A | methionine adenosyltransferase 1A |
|  | CHI3L2 | chitinase 3 like 2 |
|  | PHC2 | polyhomeotic homolog 2 |
|  | TLE6 | TLE family member 6, subcortical maternal complex member |
|  | ELL | elongation factor for RNA polymerase II |
|  | ALDOA | aldolase, fructose-bisphosphate A |
|  | FAM110D | family with sequence similarity 110 member D |
|  | P3H1 | prolyl 3-hydroxylase 1 |
|  | CSNK2A1 | casein kinase 2 alpha 1 |
|  | TFCP2 | transcription factor CP2 |
|  | PPP6R1 | protein phosphatase 6 regulatory subunit 1 |
|  | GDPD2 | glycerophosphodiester phosphodiesterase domain containing 2 |
|  | RAB26 | RAB26, member RAS oncogene family |
|  | RAB3IL1 | RAB3A interacting protein like 1 |
|  | PRSS1 | serine protease 1 |
|  | CRYBB1 | crystallin beta B1 |
|  | PUF60 | poly(U) binding splicing factor 60 |
|  | SCN1B | sodium voltage-gated channel beta subunit 1 |
|  | MYBBP1A | MYB binding protein 1a |
|  | LIN28A | lin-28 homolog A |
|  | SIX1 | SIX homeobox 1 |
|  | NXPH3 | neurexophilin 3 |
|  | UBE2NL | ubiquitin conjugating enzyme E2 N like (gene/pseudogene) |
|  | FKBP6 | FKBP prolyl isomerase family member 6 (inactive) |
|  | EPHX1 | epoxide hydrolase 1 |
|  | TFAP4 | transcription factor AP-4 |
|  | LOXL2 | lysyl oxidase like 2 |
|  | WRAP53 | WD repeat containing antisense to TP53 |
|  | TERF2 | telomeric repeat binding factor 2 |
|  | CARD8 | caspase recruitment domain family member 8 |
|  | ARHGDIB | Rho GDP dissociation inhibitor beta |
|  | SF3A3 | splicing factor 3a subunit 3 |
|  | HEY1 | hes related family bHLH transcription factor with YRPW motif 1 |
|  | ATP11A | ATPase phospholipid transporting 11A |
|  | ARHGEF16 | Rho guanine nucleotide exchange factor 16 |
|  | ZNF710 | zinc finger protein 710 |
|  | SLC36A1 | solute carrier family 36 member 1 |
|  | PCMTD2 | protein-L-isoaspartate (D-aspartate) O-methyltransferase domain containing 2 |
|  | LETM1 | leucine zipper and EF-hand containing transmembrane protein 1 |
|  | MFN2 | mitofusin 2 |
|  | IMPDH2 | inosine monophosphate dehydrogenase 2 |
|  | MTARC1 | mitochondrial amidoxime reducing component 1 |
|  | GDNF | glial cell derived neurotrophic factor |
|  | PHF10 | PHD finger protein 10 |
|  | LPIN1 | lipin 1 |
|  | STARD3 | StAR related lipid transfer domain containing 3 |
|  | NCR1 | natural cytotoxicity triggering receptor 1 |
|  | RPL8 | ribosomal protein L8 |
|  | CASP2 | caspase 2 |
|  | CYC1 | cytochrome c1 |
|  | PLCB3 | phospholipase C beta 3 |
|  | RBM15B | RNA binding motif protein 15B |
|  | RPL13A | ribosomal protein L13a |
|  | GSN | gelsolin |
|  | EFHD2 | EF-hand domain family member D2 |
|  | DNAH6 | dynein axonemal heavy chain 6 |
|  | CCL24 | C-C motif chemokine ligand 24 |
|  | FCHO1 | FCH and mu domain containing endocytic adaptor 1 |
|  | KEL | Kell metallo-endopeptidase (Kell blood group) |
|  | GDF9 | growth differentiation factor 9 |
|  | NOL9 | nucleolar protein 9 |
|  | STT3A | STT3 oligosaccharyltransferase complex catalytic subunit A |
|  | ROM1 | retinal outer segment membrane protein 1 |
|  | LIMD2 | LIM domain containing 2 |
|  | DHX38 | DEAH-box helicase 38 |
|  | VASP | vasodilator stimulated phosphoprotein |
|  | ARID1A | AT-rich interaction domain 1A |
|  | MTMR14 | myotubularin related protein 14 |
|  | MXD3 | MAX dimerization protein 3 |
|  | RCL1 | RNA terminal phosphate cyclase like 1 |
|  | FPGS | folylpolyglutamate synthase |
|  | H2AC4 | H2A clustered histone 8 |
|  | ATF6B | activating transcription factor 6 beta |
|  | AMFR | autocrine motility factor receptor |
|  | HLA-DRA | major histocompatibility complex, class II, DR alpha |
|  | ZNF212 | zinc finger protein 212 |
|  | SUPT20H | SPT20 homolog, SAGA complex component |
|  | PLPPR2 | phospholipid phosphatase related 2 |
|  | DEPP1 | DEPP1 autophagy regulator |
|  | POMP | proteasome maturation protein |
|  | CD4 | CD4 molecule |
|  | PFDN4 | prefoldin subunit 4 |
|  | SPTBN2 | spectrin beta, non-erythrocytic 2 |
|  | RPRM | reprimo, TP53 dependent G2 arrest mediator homolog |
|  | CCT8L2 | chaperonin containing TCP1 subunit 8 like 2 |
|  | TPRA1 | transmembrane protein adipocyte associated 1 |
|  | PPP5C | protein phosphatase 5 catalytic subunit |
|  | DDX54 | DEAD-box helicase 54 |
|  | ATRAID | all-trans retinoic acid induced differentiation factor |
|  | HAUS7 | HAUS augmin like complex subunit 7 |
|  | TRA2A | transformer 2 alpha homolog |
|  | INPP5K | inositol polyphosphate-5-phosphatase K |
|  | CTSD | cathepsin D |
|  | MADD | MAP kinase activating death domain |
|  | ALG12 | ALG12 alpha-1,6-mannosyltransferase |
|  | OBP2A | odorant binding protein 2A |
|  | DAPK1 | death associated protein kinase 1 |
|  | CALR | calreticulin |
|  | FNDC8 | fibronectin type III domain containing 8 |
|  | DNM2 | dynamin 2 |
|  | COPE | COPI coat complex subunit epsilon |
|  | SFRP5 | secreted frizzled related protein 5 |
|  | FAAP24 | FA core complex associated protein 24 |
|  | RERE | arginine-glutamic acid dipeptide repeats |
|  | MRTFA | myocardin related transcription factor A |
|  | ALX4 | ALX homeobox 4 |
|  | NUCB1 | nucleobindin 1 |
|  | ARHGAP4 | Rho GTPase activating protein 4 |
|  | MCM5 | minichromosome maintenance complex component 5 |
|  | ABCC1 | ATP binding cassette subfamily C member 1 |
|  | DDX25 | DEAD-box helicase 25 |
|  | MIIP | migration and invasion inhibitory protein |
|  | HIC2 | HIC ZBTB transcriptional repressor 2 |
|  | DTX3 | deltex E3 ubiquitin ligase 3 |
|  | BAAT | bile acid-CoA:amino acid N-acyltransferase |
|  | MMP15 | matrix metallopeptidase 15 |
|  | DDB1 | damage specific DNA binding protein 1 |
|  | MAPK8 | mitogen-activated protein kinase 8 |
|  | HMX1 | H6 family homeobox 1 |
|  | ISOC2 | isochorismatase domain containing 2 |
|  | PRDM8 | PR/SET domain 8 |
|  | BDH1 | 3-hydroxybutyrate dehydrogenase 1 |
|  | DRAP1 | DR1 associated protein 1 |
|  | RFC2 | replication factor C subunit 2 |
|  | HEYL | hes related family bHLH transcription factor with YRPW motif like |
|  | ADGRG3 | adhesion G protein-coupled receptor G3 |
|  | ARHGDIA | Rho GDP dissociation inhibitor alpha |
|  | CRCP | CGRP receptor component |
|  | SSRP1 | structure specific recognition protein 1 |
|  | MIER2 | MIER family member 2 |
|  | KCTD17 | potassium channel tetramerization domain containing 17 |
|  | PIN1P1 | peptidylprolyl cis/trans isomerase, NIMA-interacting 1 pseudogene 1 |
|  | GPR52 | G protein-coupled receptor 52 |
|  | BMP8A | bone morphogenetic protein 8a |
|  | SERPINB6 | serpin family B member 6 |
|  | TGFBR2 | transforming growth factor beta receptor 2 |
|  | LPAR3 | lysophosphatidic acid receptor 3 |
|  | TBRG4 | transforming growth factor beta regulator 4 |
|  | PNPLA6 | patatin like phospholipase domain containing 6 |
|  | RNASE4 | ribonuclease A family member 4 |
|  | NPM3 | nucleophosmin/nucleoplasmin 3 |
|  | LEFTY1 | left-right determination factor 1 |
|  | HLA-DPB1 | major histocompatibility complex, class II, DP beta 1 |
|  | LENEP | lens epithelial protein |
|  | FUT2 | fucosyltransferase 2 |
|  | SNRPD2 | small nuclear ribonucleoprotein D2 polypeptide |
|  | PCIF1 | phosphorylated CTD interacting factor 1 |
|  | PSAT1 | phosphoserine aminotransferase 1 |
|  | RDX | radixin |
|  | SLC29A2 | solute carrier family 29 member 2 |
|  | ATOH1 | atonal bHLH transcription factor 1 |
|  | PHB2 | prohibitin 2 |
|  | EHBP1L1 | EH domain binding protein 1 like 1 |
|  | SF3B4 | splicing factor 3b subunit 4 |
|  | CDH5 | cadherin 5 |
|  | KRT83 | keratin 83 |
|  | HYDIN | HYDIN axonemal central pair apparatus protein |
|  | UNC45A | unc-45 myosin chaperone A |
|  | CHD4 | chromodomain helicase DNA binding protein 4 |
|  | MSH6 | mutS homolog 6 |
|  | KAT8 | lysine acetyltransferase 8 |
|  | SNCB | synuclein beta |
|  | LPGAT1 | lysophosphatidylglycerol acyltransferase 1 |
|  | PRB1 | proline rich protein BstNI subfamily 1 |
|  | HMGB2 | high mobility group box 2 |
|  | ENY2 | ENY2 transcription and export complex 2 subunit |
|  | MADCAM1 | mucosal vascular addressin cell adhesion molecule 1 |
|  | MLXIP | MLX interacting protein |
|  | SOX21 | SRY-box transcription factor 21 |
|  | TMSB4Y | thymosin beta 4 Y-linked |
|  | CNPY3 | canopy FGF signaling regulator 3 |
|  | FXYD6 | FXYD domain containing ion transport regulator 6 |
|  | NUP50 | nucleoporin 50 |
|  | RXRA | retinoid X receptor alpha |
|  | SSH1 | slingshot protein phosphatase 1 |
|  | SLC1A7 | solute carrier family 1 member 7 |
|  | FHL3 | four and a half LIM domains 3 |
|  | SLC14A2 | solute carrier family 14 member 2 |
|  | SZRD1 | SUZ RNA binding domain containing 1 |
|  | NSUN5 | NOP2/Sun RNA methyltransferase 5 |
|  | CCDC28B | coiled-coil domain containing 28B |
|  | TUBD1 | tubulin delta 1 |
|  | PTPRS | protein tyrosine phosphatase receptor type S |
|  | HNRNPU | heterogeneous nuclear ribonucleoprotein U |
|  | MTHFD1 | methylenetetrahydrofolate dehydrogenase, cyclohydrolase and formyltetrahydrofolate synthetase 1 |
|  | QRICH1 | glutamine rich 1 |
|  | RBP3 | retinol binding protein 3 |
|  | AP2S1 | adaptor related protein complex 2 subunit sigma 1 |
|  | EIF3G | eukaryotic translation initiation factor 3 subunit G |
|  | CTNNA1 | catenin alpha 1 |
|  | SRC | SRC proto-oncogene, non-receptor tyrosine kinase |
|  | VPS26C | VPS26 endosomal protein sorting factor C |
|  | DUSP7 | dual specificity phosphatase 7 |
|  | LTB4R | leukotriene B4 receptor |
|  | GIT1 | GIT ArfGAP 1 |
|  | S100A6 | S100 calcium binding protein A6 |
|  | LSM14A | LSM14A mRNA processing body assembly factor |
|  | MTREX | Mtr4 exosome RNA helicase |
|  | RRM1 | ribonucleotide reductase catalytic subunit M1 |
|  | CYBA | cytochrome b-245 alpha chain |
|  | SLC1A6 | solute carrier family 1 member 6 |
|  | SAP25 | Sin3A associated protein 25 |
|  | STXBP2 | syntaxin binding protein 2 |
|  | GDI2 | GDP dissociation inhibitor 2 |
|  | ICAM1 | intercellular adhesion molecule 1 |
|  | TARBP2 | TARBP2 subunit of RISC loading complex |
|  | RSBN1 | round spermatid basic protein 1 |
|  | GABPA | GA binding protein transcription factor subunit alpha |
|  | NKX2-1 | NK2 homeobox 1 |
|  | PDK1 | pyruvate dehydrogenase kinase 1 |
|  | SCAND1 | SCAN domain containing 1 |
|  | ATP6V0C | ATPase H+ transporting V0 subunit c |
|  | FZD4 | frizzled class receptor 4 |
|  | GNL3L | G protein nucleolar 3 like |
|  | GIPR | gastric inhibitory polypeptide receptor |
|  | FGD1 | FYVE, RhoGEF and PH domain containing 1 |
|  | MYCN | MYCN proto-oncogene, bHLH transcription factor |
|  | GSDMD | gasdermin D |
|  | VRTN | vertebrae development associated |
|  | PTPRU | protein tyrosine phosphatase receptor type U |
|  | PPAN | peter pan homolog |
|  | MARCHF2 | membrane associated ring-CH-type finger 2 |
|  | PMEL | premelanosome protein |
|  | UPK3A | uroplakin 3A |
|  | DNMT3B | DNA methyltransferase 3 beta |
|  | PIEZO1 | piezo type mechanosensitive ion channel component 1 |
|  | DEPDC5 | DEP domain containing 5, GATOR1 subcomplex subunit |
|  | MAZ | MYC associated zinc finger protein |
|  | PROP1 | PROP paired-like homeobox 1 |
|  | GJB3 | gap junction protein beta 3 |
|  | PLCB2 | phospholipase C beta 2 |
|  | IRF4 | interferon regulatory factor 4 |
|  | COPS3 | COP9 signalosome subunit 3 |
|  | C4BPB | complement component 4 binding protein beta |
|  | PI4KB | phosphatidylinositol 4-kinase beta |
|  | SMARCD2 | SWI/SNF related, matrix associated, actin dependent regulator of chromatin, subfamily d, member 2 |
|  | TRAF4 | TNF receptor associated factor 4 |
|  | PRAMEF11 | PRAME family member 11 |
|  | STARD8 | StAR related lipid transfer domain containing 8 |
|  | CDC42EP4 | CDC42 effector protein 4 |
|  | ZNF609 | zinc finger protein 609 |
|  | SPOUT1 | SPOUT domain containing methyltransferase 1 |
|  | ORAI2 | ORAI calcium release-activated calcium modulator 2 |
|  | MMP11 | matrix metallopeptidase 11 |
|  | CD7 | CD7 molecule |
|  | GNB3 | G protein subunit beta 3 |
|  | DAPK3 | death associated protein kinase 3 |
|  | MTNR1B | melatonin receptor 1B |
|  | PPIL6 | peptidylprolyl isomerase like 6 |
|  | GPI | glucose-6-phosphate isomerase |
|  | TRIM17 | tripartite motif containing 17 |
|  | ILF3 | interleukin enhancer binding factor 3 |
|  | RBM6 | RNA binding motif protein 6 |
|  | POU2F2 | POU class 2 homeobox 2 |
|  | RALB | RAS like proto-oncogene B |
|  | ARL6IP4 | ADP ribosylation factor like GTPase 6 interacting protein 4 |
|  | PCNX1 | pecanex 1 |
|  | RND3 | Rho family GTPase 3 |
|  | LRRC3 | leucine rich repeat containing 3 |
|  | AIRE | autoimmune regulator |
|  | CACNA1B | calcium voltage-gated channel subunit alpha1 B |
|  | EMID1 | EMI domain containing 1 |
|  | RNF216 | ring finger protein 216 |
|  | MAGEC2 | MAGE family member C2 |
|  | PTGDR2 | prostaglandin D2 receptor 2 |
|  | KIF17 | kinesin family member 17 |
|  | SMTN | smoothelin |
|  | SOX18 | SRY-box transcription factor 18 |
|  | FCER2 | Fc epsilon receptor II |
|  | ZNF124 | zinc finger protein 124 |
|  | WDR6 | WD repeat domain 6 |
|  | LRRC20 | leucine rich repeat containing 20 |
|  | NAA80 | N-alpha-acetyltransferase 80, NatH catalytic subunit |
|  | ITGA5 | integrin subunit alpha 5 |
|  | KCNK7 | potassium two pore domain channel subfamily K member 7 |
|  | TSPAN4 | tetraspanin 4 |
|  | KCNA6 | potassium voltage-gated channel subfamily A member 6 |
|  | SIGLEC7 | sialic acid binding Ig like lectin 7 |
|  | LDHC | lactate dehydrogenase C |
|  | DCAF10 | DDB1 and CUL4 associated factor 10 |
|  | CEACAM1 | CEA cell adhesion molecule 1 |
|  | SV2A | synaptic vesicle glycoprotein 2A |
|  | AAAS | aladin WD repeat nucleoporin |
|  | ARHGEF10 | Rho guanine nucleotide exchange factor 10 |
|  | TIMP3 | TIMP metallopeptidase inhibitor 3 |
|  | PLIN3 | perilipin 3 |
|  | LTBP3 | latent transforming growth factor beta binding protein 3 |
|  | PLOD1 | procollagen-lysine,2-oxoglutarate 5-dioxygenase 1 |
|  | FADS2 | fatty acid desaturase 2 |
|  | ASRGL1 | asparaginase and isoaspartyl peptidase 1 |
|  | RIN2 | Ras and Rab interactor 2 |
|  | ADA2 | adenosine deaminase 2 |
|  | LIM2 | lens intrinsic membrane protein 2 |
|  | CSF3R | colony stimulating factor 3 receptor |
|  | STRADA | STE20 related adaptor alpha |
|  | KDELR1 | KDEL endoplasmic reticulum protein retention receptor 1 |
|  | CLUH | clustered mitochondria homolog |
|  | GYG2 | glycogenin 2 |
|  | ZNF821 | zinc finger protein 821 |
|  | CYP21A2 | cytochrome P450 family 21 subfamily A member 2 |
|  | SLC6A7 | solute carrier family 6 member 7 |
|  | ASGR2 | asialoglycoprotein receptor 2 |
|  | ANGPT4 | angiopoietin 4 |
|  | CES1P1 | carboxylesterase 1 pseudogene 1 |
|  | KDELR2 | KDEL endoplasmic reticulum protein retention receptor 2 |
|  | SDF4 | stromal cell derived factor 4 |
|  | SIRPA | signal regulatory protein alpha |
|  | MYL10 | myosin light chain 10 |
|  | SGSM3 | small G protein signaling modulator 3 |
|  | ADCYAP1R1 | ADCYAP receptor type I |
|  | LAS1L | LAS1 like ribosome biogenesis factor |
|  | CLIP4 | CAP-Gly domain containing linker protein family member 4 |
|  | LRRC41 | leucine rich repeat containing 41 |
|  | GJB5 | gap junction protein beta 5 |
|  | GJC1 | gap junction protein gamma 1 |
|  | USF2 | upstream transcription factor 2, c-fos interacting |
|  | CDH7 | cadherin 7 |
|  | SLC16A8 | solute carrier family 16 member 8 |
|  | MGAT1 | alpha-1,3-mannosyl-glycoprotein 2-beta-N-acetylglucosaminyltransferase |
|  | TKT | transketolase |
|  | IL27RA | interleukin 27 receptor subunit alpha |
|  | RPGRIP1 | RPGR interacting protein 1 |
|  | PRB4 | proline rich protein BstNI subfamily 4 |
|  | CLPS | colipase |
|  | CD209 | CD209 molecule |
|  | SMPD3 | sphingomyelin phosphodiesterase 3 |
|  | RNF40 | ring finger protein 40 |
|  | CLTB | clathrin light chain B |
|  | COL6A1 | collagen type VI alpha 1 chain |
|  | SUCLG2 | succinate-CoA ligase GDP-forming subunit beta |
|  | TTC22 | tetratricopeptide repeat domain 22 |
|  | PTK7 | protein tyrosine kinase 7 (inactive) |
|  | KLK12 | kallikrein related peptidase 12 |
|  | PBXIP1 | PBX homeobox interacting protein 1 |
|  | CRYBG2 | crystallin beta-gamma domain containing 2 |
|  | MYLPF | myosin light chain, phosphorylatable, fast skeletal muscle |
|  | ARF5 | ADP ribosylation factor 5 |
|  | FAM120C | family with sequence similarity 120C |
|  | GAS6 | growth arrest specific 6 |
|  | CEP250 | centrosomal protein 250 |
|  | RHOBTB3 | Rho related BTB domain containing 3 |
|  | RPL23 | ribosomal protein L23 |
|  | CD1C | CD1c molecule |
|  | ETV4 | ETS variant transcription factor 4 |
|  | CHST8 | carbohydrate sulfotransferase 8 |
|  | PARN | poly(A)-specific ribonuclease |
|  | TNS4 | tensin 4 |
|  | AKIP1 | A-kinase interacting protein 1 |
|  | PTGIS | prostaglandin I2 synthase |
|  | TNNI3 | troponin I3, cardiac type |
|  | MAST3 | microtubule associated serine/threonine kinase 3 |
|  | TFAM | transcription factor A, mitochondrial |
|  | RRP1B | ribosomal RNA processing 1B |
|  | MLLT10 | MLLT10 histone lysine methyltransferase DOT1L cofactor |
|  | MYH14 | myosin heavy chain 14 |
|  | FNDC3B | fibronectin type III domain containing 3B |
|  | B3GNT3 | UDP-GlcNAc:betaGal beta-1,3-N-acetylglucosaminyltransferase 3 |
|  | BAIAP3 | BAI1 associated protein 3 |
|  | RPL30 | ribosomal protein L30 |
|  | DCLRE1B | DNA cross-link repair 1B |
|  | NPY | neuropeptide Y |
|  | LSAMP | limbic system associated membrane protein |
|  | ARL2BP | ADP ribosylation factor like GTPase 2 binding protein |
|  | TELO2 | telomere maintenance 2 |
|  | RPN1 | ribophorin I |
|  | WDR91 | WD repeat domain 91 |
|  | GPBP1L1 | GC-rich promoter binding protein 1 like 1 |
|  | SCD | stearoyl-CoA desaturase |
|  | NUP210 | nucleoporin 210 |
|  | PFKFB2 | 6-phosphofructo-2-kinase/fructose-2,6-biphosphatase 2 |
|  | PDIA2 | protein disulfide isomerase family A member 2 |
|  | MASP2 | MBL associated serine protease 2 |
|  | CORO2A | coronin 2A |
|  | PAQR4 | progestin and adipoQ receptor family member 4 |
|  | TAGLN2 | transgelin 2 |
|  | NPAS2 | neuronal PAS domain protein 2 |
|  | NCAPH | non-SMC condensin I complex subunit H |
|  | SPI1 | Spi-1 proto-oncogene |
|  | AKR1B1 | aldo-keto reductase family 1 member B |
|  | PACS1 | phosphofurin acidic cluster sorting protein 1 |
|  | KCNJ9 | potassium inwardly rectifying channel subfamily J member 9 |
|  | MARF1 | meiosis regulator and mRNA stability factor 1 |
|  | METRN | meteorin, glial cell differentiation regulator |
|  | RRP1 | ribosomal RNA processing 1 |
|  | ZNF286A | zinc finger protein 286A |
|  | SNED1 | sushi, nidogen and EGF like domains 1 |
|  | CTSG | cathepsin G |
|  | H2BC10 | H2B clustered histone 10 |
|  | SFTPC | surfactant protein C |
|  | PDE2A | phosphodiesterase 2A |
|  | ASAP1 | ArfGAP with SH3 domain, ankyrin repeat and PH domain 1 |
| down-regulated DEGs only in IgAN | NPHS2 | NPHS2 stomatin family member, podocin |
|  | PAM | peptidylglycine alpha-amidating monooxygenase |
|  | COX7A2 | cytochrome c oxidase subunit 7A2 |
|  | BPGM | bisphosphoglycerate mutase |
|  | DYNLT3 | dynein light chain Tctex-type 3 |
|  | EMC7 | ER membrane protein complex subunit 7 |
|  | CHCHD7 | coiled-coil-helix-coiled-coil-helix domain containing 7 |
|  | SPRY2 | sprouty RTK signaling antagonist 2 |
|  | TTC17 | tetratricopeptide repeat domain 17 |
|  | KRCC1 | lysine rich coiled-coil 1 |
|  | COL4A4 | collagen type IV alpha 4 chain |
|  | MOSPD1 | motile sperm domain containing 1 |
|  | CMC2 | C-X9-C motif containing 2 |
|  | ANAPC13 | anaphase promoting complex subunit 13 |
|  | POLR3B | RNA polymerase III subunit B |
|  | CD200 | CD200 molecule |
|  | HBEGF | heparin binding EGF like growth factor |
|  | SARAF | store-operated calcium entry associated regulatory factor |
|  | FAM8A1 | family with sequence similarity 8 member A1 |
|  | NPTN | neuroplastin |
|  | NECAP1 | NECAP endocytosis associated 1 |
|  | NPR3 | natriuretic peptide receptor 3 |
|  | NME5 | NME/NM23 family member 5 |
|  | RAD51D | RAD51 paralog D |
|  | CPQ | carboxypeptidase Q |
|  | GTF2H5 | general transcription factor IIH subunit 5 |
|  | LZTFL1 | leucine zipper transcription factor like 1 |
|  | EBNA1BP2 | EBNA1 binding protein 2 |
|  | TTC19 | tetratricopeptide repeat domain 19 |
|  | HTATIP2 | HIV-1 Tat interactive protein 2 |
|  | SSPN | sarcospan |
|  | CDR2 | cerebellar degeneration related protein 2 |
|  | ABCD3 | ATP binding cassette subfamily D member 3 |
|  | PPIC | peptidylprolyl isomerase C |
|  | CNIH1 | cornichon family AMPA receptor auxiliary protein 1 |
|  | SLC46A3 | solute carrier family 46 member 3 |
|  | CHD1 | chromodomain helicase DNA binding protein 1 |
|  | PPP2CA | protein phosphatase 2 catalytic subunit alpha |
|  | DUSP14 | dual specificity phosphatase 14 |
|  | POLB | DNA polymerase beta |
|  | PAMR1 | peptidase domain containing associated with muscle regeneration 1 |
|  | WDR37 | WD repeat domain 37 |
|  | SAR1B | secretion associated Ras related GTPase 1B |
|  | LBH | LBH regulator of WNT signaling pathway |
|  | NFE2L2 | NFE2 like bZIP transcription factor 2 |
|  | PIGK | phosphatidylinositol glycan anchor biosynthesis class K |
|  | GSPT2 | G1 to S phase transition 2 |
|  | TNS3 | tensin 3 |
|  | SNAPC3 | small nuclear RNA activating complex polypeptide 3 |
|  | RALGAPA1 | Ral GTPase activating protein catalytic subunit alpha 1 |
|  | ALG5 | ALG5 dolichyl-phosphate beta-glucosyltransferase |
|  | RABGGTB | Rab geranylgeranyltransferase subunit beta |
|  | CSRNP2 | cysteine and serine rich nuclear protein 2 |
|  | H2BC21 | H2B clustered histone 21 |
|  | MOCS2 | molybdenum cofactor synthesis 2 |
|  | PEX2 | peroxisomal biogenesis factor 2 |
|  | METTL3 | methyltransferase 3, N6-adenosine-methyltransferase complex catalytic subunit |
|  | OPTN | optineurin |
|  | TSPAN3 | tetraspanin 3 |
|  | EFHD1 | EF-hand domain family member D1 |
|  | TSTD2 | thiosulfate sulfurtransferase like domain containing 2 |
|  | DMXL1 | Dmx like 1 |
|  | CREM | cAMP responsive element modulator |
|  | PARP8 | poly(ADP-ribose) polymerase family member 8 |
|  | USP9X | ubiquitin specific peptidase 9 X-linked |
|  | SERPINB1 | serpin family B member 1 |
|  | ACYP1 | acylphosphatase 1 |
|  | KIFAP3 | kinesin associated protein 3 |
|  | ME1 | malic enzyme 1 |
|  | MAPK10 | mitogen-activated protein kinase 10 |
|  | ZBTB10 | zinc finger and BTB domain containing 10 |
|  | TIMM23 | translocase of inner mitochondrial membrane 23 |
|  | PCOLCE2 | procollagen C-endopeptidase enhancer 2 |
|  | TRAF5 | TNF receptor associated factor 5 |
|  | DMTF1 | cyclin D binding myb like transcription factor 1 |
|  | TNFRSF21 | TNF receptor superfamily member 21 |
|  | RANBP6 | RAN binding protein 6 |
|  | FGF1 | fibroblast growth factor 1 |
|  | IQCG | IQ motif containing G |
|  | MYL12A | myosin light chain 12A |
|  | C5orf15 | chromosome 5 open reading frame 15 |
|  | DNAJB9 | DnaJ heat shock protein family (Hsp40) member B9 |
|  | MYOZ2 | myozenin 2 |
|  | IFT57 | intraflagellar transport 57 |
|  | RBBP8 | RB binding protein 8, endonuclease |
|  | YIPF6 | Yip1 domain family member 6 |
|  | NDUFB3 | NADH:ubiquinone oxidoreductase subunit B3 |
|  | RNF14 | ring finger protein 14 |
|  | ZFHX4 | zinc finger homeobox 4 |
|  | SERPINI1 | serpin family I member 1 |
|  | RWDD1 | RWD domain containing 1 |
|  | COL4A5 | collagen type IV alpha 5 chain |
|  | ISCU | iron-sulfur cluster assembly enzyme |
|  | CLIC5 | chloride intracellular channel 5 |
|  | USP8 | ubiquitin specific peptidase 8 |
|  | NEK4 | NIMA related kinase 4 |
|  | SS18L1 | SS18L1 subunit of BAF chromatin remodeling complex |
|  | PDLIM3 | PDZ and LIM domain 3 |
|  | AMIGO2 | adhesion molecule with Ig like domain 2 |
|  | MTMR9 | myotubularin related protein 9 |
|  | SPRING1 | SREBF pathway regulator in golgi 1 |
|  | USP16 | ubiquitin specific peptidase 16 |
|  | CPLANE1 | ciliogenesis and planar polarity effector complex subunit 1 |
|  | BPTF | bromodomain PHD finger transcription factor |
|  | FBXL2 | F-box and leucine rich repeat protein 2 |
|  | UBE2B | ubiquitin conjugating enzyme E2 B |
|  | SECISBP2L | SECIS binding protein 2 like |
|  | ARL1 | ADP ribosylation factor like GTPase 1 |
|  | IER3 | immediate early response 3 |
|  | ITGAV | integrin subunit alpha V |
|  | MOAP1 | modulator of apoptosis 1 |
|  | TASP1 | taspase 1 |
|  | FAM131A | family with sequence similarity 131 member A |
|  | ADM | adrenomedullin |
|  | DHRS7B | dehydrogenase/reductase 7B |
|  | GLRX2 | glutaredoxin 2 |
|  | TRPC6 | transient receptor potential cation channel subfamily C member 6 |
|  | FAM189A2 | family with sequence similarity 189 member A2 |
|  | SLC35D2 | solute carrier family 35 member D2 |
|  | COPS8 | COP9 signalosome subunit 8 |
|  | TMEM14A | transmembrane protein 14A |
|  | SCP2 | sterol carrier protein 2 |
|  | RORA | RAR related orphan receptor A |
|  | SPATA2L | spermatogenesis associated 2 like |
|  | ITM2B | integral membrane protein 2B |
|  | RXYLT1 | ribitol xylosyltransferase 1 |
|  | CLN5 | CLN5 intracellular trafficking protein |
|  | EIF1B | eukaryotic translation initiation factor 1B |
|  | FDX1 | ferredoxin 1 |
|  | CCDC68 | coiled-coil domain containing 68 |
|  | AGPAT4 | 1-acylglycerol-3-phosphate O-acyltransferase 4 |
|  | CRIPT | CXXC repeat containing interactor of PDZ3 domain |
|  | MMUT | methylmalonyl-CoA mutase |
|  | TSPAN2 | tetraspanin 2 |
|  | MLF1 | myeloid leukemia factor 1 |
|  | PTGER4 | prostaglandin E receptor 4 |
|  | LRP2BP | LRP2 binding protein |
|  | DACH1 | dachshund family transcription factor 1 |
|  | EXOSC7 | exosome component 7 |
|  | STX8 | syntaxin 8 |
|  | TCEAL2 | transcription elongation factor A like 2 |
|  | PLBD1 | phospholipase B domain containing 1 |
|  | RAB9A | RAB9A, member RAS oncogene family |
|  | CUL3 | cullin 3 |
|  | MIS12 | MIS12 kinetochore complex component |
|  | PSMA5 | proteasome 20S subunit alpha 5 |
|  | STK17A | serine/threonine kinase 17a |
|  | LIPT1 | lipoyltransferase 1 |
|  | GEM | GTP binding protein overexpressed in skeletal muscle |
|  | STX17 | syntaxin 17 |
|  | RMDN1 | regulator of microtubule dynamics 1 |
|  | NFU1 | NFU1 iron-sulfur cluster scaffold |
|  | TMEM59 | transmembrane protein 59 |
|  | TMEM168 | transmembrane protein 168 |
|  | ZNF180 | zinc finger protein 180 |
|  | DESI2 | desumoylating isopeptidase 2 |
|  | FLRT3 | fibronectin leucine rich transmembrane protein 3 |
|  | MAFF | MAF bZIP transcription factor F |
|  | CYP4B1 | cytochrome P450 family 4 subfamily B member 1 |
|  | TRMO | tRNA methyltransferase O |
|  | C3orf14 | chromosome 3 open reading frame 14 |
|  | LSM1 | LSM1 homolog, mRNA degradation associated |
|  | NSUN3 | NOP2/Sun RNA methyltransferase 3 |
|  | UFC1 | ubiquitin-fold modifier conjugating enzyme 1 |
|  | HOXA10 | homeobox A10 |
|  | EPHA2 | EPH receptor A2 |
|  | UAP1 | UDP-N-acetylglucosamine pyrophosphorylase 1 |
|  | GEMIN8 | gem nuclear organelle associated protein 8 |
|  | LYRM1 | LYR motif containing 1 |
|  | GDF15 | growth differentiation factor 15 |
|  | ATP5MF | ATP synthase membrane subunit f |
|  | RIOX2 | ribosomal oxygenase 2 |
|  | YME1L1 | YME1 like 1 ATPase |
|  | STAMBP | STAM binding protein |
|  | PTS | 6-pyruvoyltetrahydropterin synthase |
|  | PGRMC2 | progesterone receptor membrane component 2 |
|  | CFAP20 | cilia and flagella associated protein 20 |
|  | APMAP | adipocyte plasma membrane associated protein |
|  | BCCIP | BRCA2 and CDKN1A interacting protein |
|  | CEP43 | centrosomal protein 43 |
|  | FKRP | fukutin related protein |
|  | SMIM7 | small integral membrane protein 7 |
|  | PDSS2 | decaprenyl diphosphate synthase subunit 2 |
|  | UBE2W | ubiquitin conjugating enzyme E2 W |
|  | IDS | iduronate 2-sulfatase |
|  | PIAS3 | protein inhibitor of activated STAT 3 |
|  | COL4A3 | collagen type IV alpha 3 chain |
|  | TMCO1 | transmembrane and coiled-coil domains 1 |
|  | YIPF1 | Yip1 domain family member 1 |
|  | BMPR1A | bone morphogenetic protein receptor type 1A |
|  | LINC00472 | long intergenic non-protein coding RNA 472 |
|  | SNRNP27 | small nuclear ribonucleoprotein U4/U6.U5 subunit 27 |
|  | UBA2 | ubiquitin like modifier activating enzyme 2 |
|  | PCSK5 | proprotein convertase subtilisin/kexin type 5 |
|  | MRPL46 | mitochondrial ribosomal protein L46 |
|  | HOXC6 | homeobox C6 |
|  | TNFRSF12A | TNF receptor superfamily member 12A |
|  | NT5E | 5'-nucleotidase ecto |
|  | MNT | MAX network transcriptional repressor |
|  | TIPARP | TCDD inducible poly(ADP-ribose) polymerase |
|  | LGALS8 | galectin 8 |
|  | RNASEH2B | ribonuclease H2 subunit B |
|  | POLR2K | RNA polymerase II, I and III subunit K |
|  | GRAMD2B | GRAM domain containing 2B |
|  | ENPP4 | ectonucleotide pyrophosphatase/phosphodiesterase 4 |
|  | RABGEF1 | RAB guanine nucleotide exchange factor 1 |
|  | VPS54 | VPS54 subunit of GARP complex |
|  | NKRF | NFKB repressing factor |
|  | TBCA | tubulin folding cofactor A |
|  | NEO1 | neogenin 1 |
|  | ANGEL2 | angel homolog 2 |
|  | ATG3 | autophagy related 3 |
|  | ZNF239 | zinc finger protein 239 |
|  | TM2D1 | TM2 domain containing 1 |
|  | CAMTA2 | calmodulin binding transcription activator 2 |
|  | C7orf25 | chromosome 7 open reading frame 25 |
|  | BBS7 | Bardet-Biedl syndrome 7 |
|  | TCTN1 | tectonic family member 1 |
|  | MECR | mitochondrial trans-2-enoyl-CoA reductase |
|  | CETN2 | centrin 2 |
|  | ANAPC10 | anaphase promoting complex subunit 10 |
|  | PTCD3 | pentatricopeptide repeat domain 3 |
|  | YTHDC2 | YTH domain containing 2 |
|  | MARS1 | methionyl-tRNA synthetase 1 |
|  | ZNF134 | zinc finger protein 134 |
|  | BEX3 | brain expressed X-linked 3 |
|  | ZNF44 | zinc finger protein 44 |
|  | RBX1 | ring-box 1 |
|  | SDF2 | stromal cell derived factor 2 |
|  | ANXA1 | annexin A1 |
|  | CNPY2 | canopy FGF signaling regulator 2 |
|  | CDIPT | CDP-diacylglycerol--inositol 3-phosphatidyltransferase |
|  | SRSF10 | serine and arginine rich splicing factor 10 |
|  | FAHD2A | fumarylacetoacetate hydrolase domain containing 2A |
|  | ATP1B3 | ATPase Na+/K+ transporting subunit beta 3 |
|  | INSIG2 | insulin induced gene 2 |
|  | SUSD6 | sushi domain containing 6 |
|  | EDEM3 | ER degradation enhancing alpha-mannosidase like protein 3 |
|  | RETSAT | retinol saturase |
|  | CUTC | cutC copper transporter |
|  | BCL2L13 | BCL2 like 13 |
|  | AP1G1 | adaptor related protein complex 1 subunit gamma 1 |
|  | NIPA2 | NIPA magnesium transporter 2 |
|  | SAP30L | SAP30 like |
|  | PDHB | pyruvate dehydrogenase E1 subunit beta |
|  | ID4 | inhibitor of DNA binding 4, HLH protein |
|  | PNPLA4 | patatin like phospholipase domain containing 4 |
|  | GMFB | glia maturation factor beta |
|  | UBXN8 | UBX domain protein 8 |
|  | PGAP1 | post-GPI attachment to proteins inositol deacylase 1 |
|  | QRSL1 | glutaminyl-tRNA amidotransferase subunit QRSL1 |
|  | THSD7A | thrombospondin type 1 domain containing 7A |
|  | C1QBP | complement C1q binding protein |
|  | C12orf29 | chromosome 12 open reading frame 29 |
|  | CREBBP | CREB binding protein |
|  | NUDT15 | nudix hydrolase 15 |
|  | NEDD8 | NEDD8 ubiquitin like modifier |
|  | ZNF329 | zinc finger protein 329 |
|  | NAXD | NAD(P)HX dehydratase |
|  | LCMT1 | leucine carboxyl methyltransferase 1 |
|  | ERO1B | endoplasmic reticulum oxidoreductase 1 beta |
|  | TCEAL4 | transcription elongation factor A like 4 |
|  | MYL6 | myosin light chain 6 |
|  | EBAG9 | estrogen receptor binding site associated antigen 9 |
|  | FNTA | farnesyltransferase, CAAX box, alpha |
|  | DELE1 | DAP3 binding cell death enhancer 1 |
|  | ANXA4 | annexin A4 |
|  | SIRT1 | sirtuin 1 |
|  | PPP1R8 | protein phosphatase 1 regulatory subunit 8 |
|  | CDH12 | cadherin 12 |
|  | PTRH2 | peptidyl-tRNA hydrolase 2 |
|  | ITGB8 | integrin subunit beta 8 |
|  | CSNK1G3 | casein kinase 1 gamma 3 |
|  | HACD1 | 3-hydroxyacyl-CoA dehydratase 1 |
|  | TSEN34 | tRNA splicing endonuclease subunit 34 |
|  | ALDH9A1 | aldehyde dehydrogenase 9 family member A1 |
|  | MAPK1IP1L | mitogen-activated protein kinase 1 interacting protein 1 like |
|  | PDCD2 | programmed cell death 2 |
|  | ARF4 | ADP ribosylation factor 4 |
|  | STAT4 | signal transducer and activator of transcription 4 |
|  | LANCL2 | LanC like 2 |
|  | MAP9 | microtubule associated protein 9 |
|  | MTRR | 5-methyltetrahydrofolate-homocysteine methyltransferase reductase |
|  | ATP5PF | ATP synthase peripheral stalk subunit F6 |
|  | ATG2B | autophagy related 2B |
|  | LAPTM4A | lysosomal protein transmembrane 4 alpha |
|  | DNAJB14 | DnaJ heat shock protein family (Hsp40) member B14 |
|  | TTC37 | tetratricopeptide repeat domain 37 |
|  | PIK3C3 | phosphatidylinositol 3-kinase catalytic subunit type 3 |
|  | PIGF | phosphatidylinositol glycan anchor biosynthesis class F |
|  | SNX4 | sorting nexin 4 |
|  | SEC24D | SEC24 homolog D, COPII coat complex component |
|  | ETFDH | electron transfer flavoprotein dehydrogenase |
|  | PPM1H | protein phosphatase, Mg2+/Mn2+ dependent 1H |
|  | TRIM13 | tripartite motif containing 13 |
|  | CCNH | cyclin H |
|  | RNF170 | ring finger protein 170 |
|  | KANSL2 | KAT8 regulatory NSL complex subunit 2 |
|  | PMF1 | polyamine modulated factor 1 |
|  | ZNF571 | zinc finger protein 571 |
|  | SCFD1 | sec1 family domain containing 1 |
|  | ATP6V1D | ATPase H+ transporting V1 subunit D |
|  | MRPL16 | mitochondrial ribosomal protein L16 |
|  | ARHGEF3 | Rho guanine nucleotide exchange factor 3 |
|  | ST3GAL6 | ST3 beta-galactoside alpha-2,3-sialyltransferase 6 |
|  | SRSF11 | serine and arginine rich splicing factor 11 |
|  | CD47 | CD47 molecule |
|  | PXDC1 | PX domain containing 1 |
|  | RRAGA | Ras related GTP binding A |
|  | RETREG2 | reticulophagy regulator family member 2 |
|  | HSPA4L | heat shock protein family A (Hsp70) member 4 like |
|  | IPO7 | importin 7 |
|  | PHLDA1 | pleckstrin homology like domain family A member 1 |
|  | GAREM1 | GRB2 associated regulator of MAPK1 subtype 1 |
|  | RANBP2 | RAN binding protein 2 |
|  | GYG1 | glycogenin 1 |
|  | ZNF75D | zinc finger protein 75D |
|  | VNN1 | vanin 1 |
|  | MRPL48 | mitochondrial ribosomal protein L48 |
|  | EGR3 | early growth response 3 |
|  | PPCS | phosphopantothenoylcysteine synthetase |
|  | RSRP1 | arginine and serine rich protein 1 |
|  | BEX4 | brain expressed X-linked 4 |
|  | N6AMT1 | N-6 adenine-specific DNA methyltransferase 1 |
|  | DLD | dihydrolipoamide dehydrogenase |
|  | TSEN2 | tRNA splicing endonuclease subunit 2 |
|  | NOL7 | nucleolar protein 7 |
|  | TMED5 | transmembrane p24 trafficking protein 5 |
|  | ACYP2 | acylphosphatase 2 |
|  | APOO | apolipoprotein O |
|  | PRKACB | protein kinase cAMP-activated catalytic subunit beta |
|  | TSPYL4 | TSPY like 4 |
|  | LYRM4 | LYR motif containing 4 |
|  | FKTN | fukutin |
|  | KHDC4 | KH domain containing 4, pre-mRNA splicing factor |
|  | HIVEP2 | HIVEP zinc finger 2 |
|  | CASP9 | caspase 9 |
|  | ELOVL6 | ELOVL fatty acid elongase 6 |
|  | KIFBP | kinesin family binding protein |
|  | MME | membrane metalloendopeptidase |
|  | PRKD1 | protein kinase D1 |
|  | NDUFAF1 | NADH:ubiquinone oxidoreductase complex assembly factor 1 |
|  | NDNF | neuron derived neurotrophic factor |
|  | MIR22HG | MIR22 host gene |
|  | MAGEH1 | MAGE family member H1 |
|  | OXR1 | oxidation resistance 1 |
|  | RPA2 | replication protein A2 |
|  | NDFIP1 | Nedd4 family interacting protein 1 |
|  | ECM2 | extracellular matrix protein 2 |
|  | ZNF23 | zinc finger protein 23 |
|  | WDR33 | WD repeat domain 33 |
|  | ZNF232 | zinc finger protein 232 |
|  | OSBPL2 | oxysterol binding protein like 2 |
|  | CILP | cartilage intermediate layer protein |
|  | DEFA4 | defensin alpha 4 |
|  | F5 | coagulation factor V |
|  | TBX21 | T-box transcription factor 21 |
|  | MED14 | mediator complex subunit 14 |
|  | MNS1 | meiosis specific nuclear structural 1 |
|  | REXO2 | RNA exonuclease 2 |
|  | EIF3J | eukaryotic translation initiation factor 3 subunit J |
|  | TUFT1 | tuftelin 1 |
|  | DNALI1 | dynein axonemal light intermediate chain 1 |
|  | AMD1 | adenosylmethionine decarboxylase 1 |
|  | HSPBAP1 | HSPB1 associated protein 1 |
|  | PLEKHA5 | pleckstrin homology domain containing A5 |
|  | MTM1 | myotubularin 1 |
|  | VCAM1 | vascular cell adhesion molecule 1 |
|  | NOVA1 | NOVA alternative splicing regulator 1 |
|  | TRAPPC13 | trafficking protein particle complex subunit 13 |
|  | STARD7 | StAR related lipid transfer domain containing 7 |
|  | RAD17 | RAD17 checkpoint clamp loader component |
|  | VPS11 | VPS11 core subunit of CORVET and HOPS complexes |
|  | CD2AP | CD2 associated protein |
|  | PAK1IP1 | PAK1 interacting protein 1 |
|  | TTI1 | TELO2 interacting protein 1 |
|  | WBP4 | WW domain binding protein 4 |
|  | ARHGEF12 | Rho guanine nucleotide exchange factor 12 |
|  | GPN3 | GPN-loop GTPase 3 |
|  | CREB3L2 | cAMP responsive element binding protein 3 like 2 |
|  | TRMT2B | tRNA methyltransferase 2 homolog B |
|  | ATXN3 | ataxin 3 |
|  | RPP38 | ribonuclease P/MRP subunit p38 |
|  | LRP10 | LDL receptor related protein 10 |
|  | BEAN1 | brain expressed associated with NEDD4 1 |
|  | ZKSCAN8 | zinc finger with KRAB and SCAN domains 8 |
|  | ARMCX5 | armadillo repeat containing X-linked 5 |
|  | UFL1 | UFM1 specific ligase 1 |
|  | KCNS3 | potassium voltage-gated channel modifier subfamily S member 3 |
|  | MKRN1 | makorin ring finger protein 1 |
|  | POLR1C | RNA polymerase I and III subunit C |
|  | HIBCH | 3-hydroxyisobutyryl-CoA hydrolase |
|  | ELOC | elongin C |
|  | LAMTOR5 | late endosomal/lysosomal adaptor, MAPK and MTOR activator 5 |
|  | MTERF1 | mitochondrial transcription termination factor 1 |
|  | NGLY1 | N-glycanase 1 |
|  | PLA2G4C | phospholipase A2 group IVC |
|  | RLF | RLF zinc finger |
|  | SRP14 | signal recognition particle 14 |
|  | GADD45A | growth arrest and DNA damage inducible alpha |
|  | DVL3 | dishevelled segment polarity protein 3 |
|  | KCNJ2 | potassium inwardly rectifying channel subfamily J member 2 |
|  | NRDC | nardilysin convertase |
|  | RFK | riboflavin kinase |
|  | KPNA2 | karyopherin subunit alpha 2 |
|  | HSD17B4 | hydroxysteroid 17-beta dehydrogenase 4 |
|  | RIOK2 | RIO kinase 2 |
|  | CCT6A | chaperonin containing TCP1 subunit 6A |
|  | B4GALT4 | beta-1,4-galactosyltransferase 4 |
|  | TCEAL9 | transcription elongation factor A like 9 |
|  | RHEB | Ras homolog, mTORC1 binding |
|  | MTPAP | mitochondrial poly(A) polymerase |
|  | PNMA1 | PNMA family member 1 |
|  | NR1D2 | nuclear receptor subfamily 1 group D member 2 |
|  | FGD6 | FYVE, RhoGEF and PH domain containing 6 |
|  | MARK3 | microtubule affinity regulating kinase 3 |
|  | TCTN3 | tectonic family member 3 |
|  | KDSR | 3-ketodihydrosphingosine reductase |
|  | ACADSB | acyl-CoA dehydrogenase short/branched chain |
|  | ZNF529 | zinc finger protein 529 |
|  | HSDL2 | hydroxysteroid dehydrogenase like 2 |
|  | PTPRO | protein tyrosine phosphatase receptor type O |
|  | HMGCR | 3-hydroxy-3-methylglutaryl-CoA reductase |
|  | SMUG1 | single-strand-selective monofunctional uracil-DNA glycosylase 1 |
|  | PCSK7 | proprotein convertase subtilisin/kexin type 7 |
|  | VPS26A | VPS26, retromer complex component A |
|  | C1orf109 | chromosome 1 open reading frame 109 |
|  | PELI2 | pellino E3 ubiquitin protein ligase family member 2 |
|  | MANSC1 | MANSC domain containing 1 |
|  | TEAD1 | TEA domain transcription factor 1 |
|  | HHLA3 | HERV-H LTR-associating 3 |
|  | MAPK9 | mitogen-activated protein kinase 9 |
|  | ALG13 | ALG13 UDP-N-acetylglucosaminyltransferase subunit |
|  | GCLM | glutamate-cysteine ligase modifier subunit |
|  | SAP18 | Sin3A associated protein 18 |
|  | PSMB5 | proteasome 20S subunit beta 5 |
|  | PPP4R1 | protein phosphatase 4 regulatory subunit 1 |
|  | TMOD3 | tropomodulin 3 |
|  | HADHB | hydroxyacyl-CoA dehydrogenase trifunctional multienzyme complex subunit beta |
|  | MEGF9 | multiple EGF like domains 9 |
|  | SLC25A32 | solute carrier family 25 member 32 |
|  | THUMPD2 | THUMP domain containing 2 |
|  | MED24 | mediator complex subunit 24 |
|  | TMOD1 | tropomodulin 1 |
|  | CAST | calpastatin |
|  | STXBP3 | syntaxin binding protein 3 |
|  | TUBB2A | tubulin beta 2A class IIa |
|  | ZHX2 | zinc fingers and homeoboxes 2 |
|  | H4C8 | H4 clustered histone 8 |
|  | TMEM134 | transmembrane protein 134 |
|  | DCTD | dCMP deaminase |
|  | PSMD9 | proteasome 26S subunit, non-ATPase 9 |
|  | ADO | 2-aminoethanethiol dioxygenase |
|  | TRIM32 | tripartite motif containing 32 |
|  | ZSCAN31 | zinc finger and SCAN domain containing 31 |
|  | SMARCA1 | SWI/SNF related, matrix associated, actin dependent regulator of chromatin, subfamily a, member 1 |
|  | ATP2C1 | ATPase secretory pathway Ca2+ transporting 1 |
|  | PDZD2 | PDZ domain containing 2 |
|  | SNX3 | sorting nexin 3 |
|  | PPP1R3C | protein phosphatase 1 regulatory subunit 3C |
|  | REEP5 | receptor accessory protein 5 |
|  | PHLPP2 | PH domain and leucine rich repeat protein phosphatase 2 |
|  | FOXK2 | forkhead box K2 |
|  | DKK3 | dickkopf WNT signaling pathway inhibitor 3 |
|  | MR1 | major histocompatibility complex, class I-related |
|  | PIN4 | peptidylprolyl cis/trans isomerase, NIMA-interacting 4 |
|  | ACTR8 | actin related protein 8 |
|  | FBXO38 | F-box protein 38 |
|  | CCT2 | chaperonin containing TCP1 subunit 2 |
|  | DDX1 | DEAD-box helicase 1 |
|  | ELANE | elastase, neutrophil expressed |
|  | SDC4 | syndecan 4 |
|  | POT1 | protection of telomeres 1 |
|  | RSRC2 | arginine and serine rich coiled-coil 2 |
|  | SLC12A7 | solute carrier family 12 member 7 |
|  | TRMT61B | tRNA methyltransferase 61B |
|  | N4BP2L2 | NEDD4 binding protein 2 like 2 |
|  | COLGALT2 | collagen beta(1-O)galactosyltransferase 2 |
|  | ZFYVE26 | zinc finger FYVE-type containing 26 |
|  | PIGO | phosphatidylinositol glycan anchor biosynthesis class O |
|  | C3orf52 | chromosome 3 open reading frame 52 |
|  | MIOS | meiosis regulator for oocyte development |
|  | ZNF587B | zinc finger protein 587B |
|  | CDK14 | cyclin dependent kinase 14 |
|  | EYA2 | EYA transcriptional coactivator and phosphatase 2 |
|  | SKP1 | S-phase kinase associated protein 1 |
|  | SLK | STE20 like kinase |
|  | PELO | pelota mRNA surveillance and ribosome rescue factor |
|  | EIF2B1 | eukaryotic translation initiation factor 2B subunit alpha |
|  | HS3ST2 | heparan sulfate-glucosamine 3-sulfotransferase 2 |
|  | SUCO | SUN domain containing ossification factor |
|  | FXYD1 | FXYD domain containing ion transport regulator 1 |
|  | TMX2 | thioredoxin related transmembrane protein 2 |
|  | OGFOD3 | 2-oxoglutarate and iron dependent oxygenase domain containing 3 |
|  | TGIF1 | TGFB induced factor homeobox 1 |
|  | HOXA1 | homeobox A1 |
|  | MYO1B | myosin IB |
|  | CDC42EP3 | CDC42 effector protein 3 |
|  | PIGH | phosphatidylinositol glycan anchor biosynthesis class H |
|  | HOMER1 | homer scaffold protein 1 |
|  | CTH | cystathionine gamma-lyase |
|  | DZANK1 | double zinc ribbon and ankyrin repeat domains 1 |
|  | HS3ST3A1 | heparan sulfate-glucosamine 3-sulfotransferase 3A1 |
|  | MAIP1 | matrix AAA peptidase interacting protein 1 |
|  | NAT1 | N-acetyltransferase 1 |
|  | ELP1 | elongator acetyltransferase complex subunit 1 |
|  | SGMS1 | sphingomyelin synthase 1 |
|  | PEX11B | peroxisomal biogenesis factor 11 beta |
|  | MID2 | midline 2 |
|  | PTPRD | protein tyrosine phosphatase receptor type D |
|  | MRAS | muscle RAS oncogene homolog |
|  | ADAMTS5 | ADAM metallopeptidase with thrombospondin type 1 motif 5 |
|  | HS2ST1 | heparan sulfate 2-O-sulfotransferase 1 |
|  | C1orf216 | chromosome 1 open reading frame 216 |
|  | DAAM2 | dishevelled associated activator of morphogenesis 2 |
|  | RRAGB | Ras related GTP binding B |
|  | POP4 | POP4 homolog, ribonuclease P/MRP subunit |
|  | UFSP2 | UFM1 specific peptidase 2 |
|  | EIF2B2 | eukaryotic translation initiation factor 2B subunit beta |
|  | ATP6V0E2 | ATPase H+ transporting V0 subunit e2 |
|  | MEX3C | mex-3 RNA binding family member C |
|  | MTR | 5-methyltetrahydrofolate-homocysteine methyltransferase |
|  | RWDD3 | RWD domain containing 3 |
|  | WDR5B | WD repeat domain 5B |
|  | ATP5IF1 | ATP synthase inhibitory factor subunit 1 |
|  | FOSB | FosB proto-oncogene, AP-1 transcription factor subunit |
|  | GRPEL1 | GrpE like 1, mitochondrial |
|  | TBCB | tubulin folding cofactor B |
|  | QTRT2 | queuine tRNA-ribosyltransferase accessory subunit 2 |
|  | CEP41 | centrosomal protein 41 |
|  | MED21 | mediator complex subunit 21 |
|  | BBS4 | Bardet-Biedl syndrome 4 |
|  | LRBA | LPS responsive beige-like anchor protein |
|  | NUDT9 | nudix hydrolase 9 |
|  | ERP29 | endoplasmic reticulum protein 29 |
|  | HAGH | hydroxyacylglutathione hydrolase |
|  | UBR7 | ubiquitin protein ligase E3 component n-recognin 7 |
|  | ATXN10 | ataxin 10 |
|  | BIRC2 | baculoviral IAP repeat containing 2 |
|  | INVS | inversin |
|  | CTC1 | CST telomere replication complex component 1 |
|  | CCDC28A | coiled-coil domain containing 28A |
|  | ARMCX4 | armadillo repeat containing X-linked 4 |
|  | PLAA | phospholipase A2 activating protein |
|  | TMEM126B | transmembrane protein 126B |
|  | EID1 | EP300 interacting inhibitor of differentiation 1 |
|  | ESD | esterase D |
|  | HSPA14 | heat shock protein family A (Hsp70) member 14 |
|  | CAPN2 | calpain 2 |
|  | TSFM | Ts translation elongation factor, mitochondrial |
|  | MPC2 | mitochondrial pyruvate carrier 2 |
|  | PDGFRB | platelet derived growth factor receptor beta |
|  | DYNC1I1 | dynein cytoplasmic 1 intermediate chain 1 |
|  | CFDP1 | craniofacial development protein 1 |
|  | CFHR2 | complement factor H related 2 |
|  | PTDSS1 | phosphatidylserine synthase 1 |
|  | CRELD2 | cysteine rich with EGF like domains 2 |
|  | SIRT7 | sirtuin 7 |
|  | MRPS15 | mitochondrial ribosomal protein S15 |
|  | NOP14 | NOP14 nucleolar protein |
|  | SSBP1 | single stranded DNA binding protein 1 |
|  | INTS6 | integrator complex subunit 6 |
|  | ZNF8 | zinc finger protein 8 |
|  | ABITRAM | actin binding transcription modulator |
|  | MUC16 | mucin 16, cell surface associated |
|  | NAA35 | N-alpha-acetyltransferase 35, NatC auxiliary subunit |
|  | INTS13 | integrator complex subunit 13 |
|  | CMAS | cytidine monophosphate N-acetylneuraminic acid synthetase |
|  | GGNBP2 | gametogenetin binding protein 2 |
|  | SLC30A9 | solute carrier family 30 member 9 |
|  | TRIT1 | tRNA isopentenyltransferase 1 |
|  | ALDH7A1 | aldehyde dehydrogenase 7 family member A1 |
|  | SDC2 | syndecan 2 |
|  | STIMATE | STIM activating enhancer |
|  | STK39 | serine/threonine kinase 39 |
|  | AQP3 | aquaporin 3 (Gill blood group) |
|  | ELMO2 | engulfment and cell motility 2 |
|  | IDH1 | isocitrate dehydrogenase (NADP(+)) 1 |
|  | PTPRG | protein tyrosine phosphatase receptor type G |
|  | ESYT1 | extended synaptotagmin 1 |
|  | SOD1 | superoxide dismutase 1 |
|  | ENDOD1 | endonuclease domain containing 1 |
|  | KAZN | kazrin, periplakin interacting protein |
|  | ALAS1 | 5'-aminolevulinate synthase 1 |
|  | MAGI1 | membrane associated guanylate kinase, WW and PDZ domain containing 1 |
|  | CYCS | cytochrome c, somatic |
|  | KCNB1 | potassium voltage-gated channel subfamily B member 1 |
|  | WASHC5 | WASH complex subunit 5 |
|  | YARS2 | tyrosyl-tRNA synthetase 2 |
|  | EMP1 | epithelial membrane protein 1 |
|  | BACH2 | BTB domain and CNC homolog 2 |
|  | HDAC9 | histone deacetylase 9 |
|  | DOK5 | docking protein 5 |
|  | DDX41 | DEAD-box helicase 41 |
|  | CHPT1 | choline phosphotransferase 1 |
|  | TMEM165 | transmembrane protein 165 |
|  | BDH2 | 3-hydroxybutyrate dehydrogenase 2 |
|  | RBKS | ribokinase |
|  | BAZ2B | bromodomain adjacent to zinc finger domain 2B |
|  | MGLL | monoglyceride lipase |
|  | TXNDC15 | thioredoxin domain containing 15 |
|  | WDR47 | WD repeat domain 47 |
|  | MLH1 | mutL homolog 1 |
|  | CHD9 | chromodomain helicase DNA binding protein 9 |
|  | SFPQ | splicing factor proline and glutamine rich |
|  | CGGBP1 | CGG triplet repeat binding protein 1 |
|  | GMDS | GDP-mannose 4,6-dehydratase |
|  | CRY2 | cryptochrome circadian regulator 2 |
|  | RHOT1 | ras homolog family member T1 |
|  | VRK2 | VRK serine/threonine kinase 2 |
|  | ENTPD4 | ectonucleoside triphosphate diphosphohydrolase 4 |
|  | ZNF638 | zinc finger protein 638 |
|  | WLS | Wnt ligand secretion mediator |
|  | RGL1 | ral guanine nucleotide dissociation stimulator like 1 |
|  | RNF11 | ring finger protein 11 |
|  | BBS10 | Bardet-Biedl syndrome 10 |
|  | MRPS18C | mitochondrial ribosomal protein S18C |
|  | FBXW2 | F-box and WD repeat domain containing 2 |
|  | RCHY1 | ring finger and CHY zinc finger domain containing 1 |
|  | DENND4A | DENN domain containing 4A |
|  | FAM50B | family with sequence similarity 50 member B |
|  | TMEM45A | transmembrane protein 45A |
|  | IBTK | inhibitor of Bruton tyrosine kinase |
|  | BTBD1 | BTB domain containing 1 |
|  | FNBP1L | formin binding protein 1 like |
|  | MCAM | melanoma cell adhesion molecule |
|  | PAPOLA | poly(A) polymerase alpha |
|  | DHRS7 | dehydrogenase/reductase 7 |
|  | PLCL1 | phospholipase C like 1 (inactive) |
|  | NDUFAF7 | NADH:ubiquinone oxidoreductase complex assembly factor 7 |
|  | KYAT3 | kynurenine aminotransferase 3 |
|  | TMBIM4 | transmembrane BAX inhibitor motif containing 4 |
|  | TEX10 | testis expressed 10 |
|  | COMMD8 | COMM domain containing 8 |
|  | ELOA | elongin A |
|  | SACM1L | SAC1 like phosphatidylinositide phosphatase |
|  | PIGG | phosphatidylinositol glycan anchor biosynthesis class G |
|  | ANKMY2 | ankyrin repeat and MYND domain containing 2 |
|  | ZNF804A | zinc finger protein 804A |
|  | GLT8D2 | glycosyltransferase 8 domain containing 2 |
|  | MAP2K3 | mitogen-activated protein kinase kinase 3 |
|  | PGM3 | phosphoglucomutase 3 |
|  | UBE2G1 | ubiquitin conjugating enzyme E2 G1 |
|  | ZRSR2 | zinc finger CCCH-type, RNA binding motif and serine/arginine rich 2 |
|  | RBM39 | RNA binding motif protein 39 |
|  | TAF1A | TATA-box binding protein associated factor, RNA polymerase I subunit A |
|  | NDUFB2 | NADH:ubiquinone oxidoreductase subunit B2 |
|  | CRY1 | cryptochrome circadian regulator 1 |
|  | FUCA1 | alpha-L-fucosidase 1 |
|  | NFATC1 | nuclear factor of activated T cells 1 |
|  | UBAP1 | ubiquitin associated protein 1 |
|  | LDAH | lipid droplet associated hydrolase |
|  | MAPK6 | mitogen-activated protein kinase 6 |
|  | BTAF1 | B-TFIID TATA-box binding protein associated factor 1 |
|  | NFS1 | NFS1 cysteine desulfurase |
|  | AGFG1 | ArfGAP with FG repeats 1 |
|  | ABCE1 | ATP binding cassette subfamily E member 1 |
|  | ARHGAP44 | Rho GTPase activating protein 44 |
|  | MARCHF8 | membrane associated ring-CH-type finger 8 |
|  | PSMG1 | proteasome assembly chaperone 1 |
|  | PCDH17 | protocadherin 17 |
|  | CSAD | cysteine sulfinic acid decarboxylase |
|  | DYNC2LI1 | dynein cytoplasmic 2 light intermediate chain 1 |
|  | ZNF230 | zinc finger protein 230 |
|  | GPATCH2 | G-patch domain containing 2 |
|  | EPB41L5 | erythrocyte membrane protein band 4.1 like 5 |
|  | SLC5A3 | solute carrier family 5 member 3 |
|  | HS3ST3B1 | heparan sulfate-glucosamine 3-sulfotransferase 3B1 |
|  | FBXO28 | F-box protein 28 |
|  | MRPS30 | mitochondrial ribosomal protein S30 |
|  | HK2 | hexokinase 2 |
|  | GAK | cyclin G associated kinase |
|  | ANKHD1 | ankyrin repeat and KH domain containing 1 |
|  | ELL3 | elongation factor for RNA polymerase II 3 |
|  | CLK2 | CDC like kinase 2 |
|  | GABARAPL2 | GABA type A receptor associated protein like 2 |
|  | BICD1 | BICD cargo adaptor 1 |
|  | PSMD14 | proteasome 26S subunit, non-ATPase 14 |
|  | STAT6 | signal transducer and activator of transcription 6 |
|  | SLC35B1 | solute carrier family 35 member B1 |
|  | IDO1 | indoleamine 2,3-dioxygenase 1 |
|  | MEAK7 | MTOR associated protein, eak-7 homolog |
|  | ENTPD7 | ectonucleoside triphosphate diphosphohydrolase 7 |
|  | ARMCX3 | armadillo repeat containing X-linked 3 |
|  | TPD52 | tumor protein D52 |
|  | MSANTD2 | Myb/SANT DNA binding domain containing 2 |
|  | NDUFS3 | NADH:ubiquinone oxidoreductase core subunit S3 |
|  | OLFML1 | olfactomedin like 1 |
|  | PHKB | phosphorylase kinase regulatory subunit beta |
|  | AGO3 | argonaute RISC catalytic component 3 |
|  | AUNIP | aurora kinase A and ninein interacting protein |
|  | BRIX1 | biogenesis of ribosomes BRX1 |
|  | PDE4DIP | phosphodiesterase 4D interacting protein |
|  | TEP1 | telomerase associated protein 1 |
|  | PPP2R5A | protein phosphatase 2 regulatory subunit B'alpha |
|  | SDR39U1 | short chain dehydrogenase/reductase family 39U member 1 |
|  | NUBP1 | NUBP iron-sulfur cluster assembly factor 1, cytosolic |
|  | CFH | complement factor H |
|  | TM2D3 | TM2 domain containing 3 |
|  | FNBP1 | formin binding protein 1 |
|  | SPAG9 | sperm associated antigen 9 |
|  | HIGD1A | HIG1 hypoxia inducible domain family member 1A |
|  | TOM1L1 | target of myb1 like 1 membrane trafficking protein |
|  | CDC16 | cell division cycle 16 |
|  | RBFA | ribosome binding factor A |
|  | CTDSPL | CTD small phosphatase like |
|  | HMGN3 | high mobility group nucleosomal binding domain 3 |
|  | XPO4 | exportin 4 |
|  | ZFAND1 | zinc finger AN1-type containing 1 |
|  | PTER | phosphotriesterase related |
|  | DNAAF11 | dynein axonemal assembly factor 11 |
|  | CASQ1 | calsequestrin 1 |
|  | MPC1 | mitochondrial pyruvate carrier 1 |
|  | WDR44 | WD repeat domain 44 |
|  | KLHL24 | kelch like family member 24 |
|  | MYLIP | myosin regulatory light chain interacting protein |
|  | CEP68 | centrosomal protein 68 |
|  | XK | X-linked Kx blood group |
|  | TOMM70 | translocase of outer mitochondrial membrane 70 |
|  | UBR4 | ubiquitin protein ligase E3 component n-recognin 4 |
|  | NDUFS2 | NADH:ubiquinone oxidoreductase core subunit S2 |
|  | HNRNPA1 | heterogeneous nuclear ribonucleoprotein A1 |
|  | RMC1 | regulator of MON1-CCZ1 |
|  | GMNN | geminin DNA replication inhibitor |
|  | NRIP2 | nuclear receptor interacting protein 2 |
|  | DENND1A | DENN domain containing 1A |
|  | TOGARAM1 | TOG array regulator of axonemal microtubules 1 |
|  | NAV3 | neuron navigator 3 |
|  | CRYL1 | crystallin lambda 1 |
|  | POGLUT1 | protein O-glucosyltransferase 1 |
|  | MARK1 | microtubule affinity regulating kinase 1 |
|  | ELOA-AS1 | ELOA antisense RNA 1 |
|  | CYP1B1 | cytochrome P450 family 1 subfamily B member 1 |
|  | CCDC59 | coiled-coil domain containing 59 |
|  | PEX3 | peroxisomal biogenesis factor 3 |
|  | TRMT112 | tRNA methyltransferase activator subunit 11-2 |
|  | GGPS1 | geranylgeranyl diphosphate synthase 1 |
|  | SCG2 | secretogranin II |
|  | DNAJB4 | DnaJ heat shock protein family (Hsp40) member B4 |
|  | CEP76 | centrosomal protein 76 |
|  | ZNF112 | zinc finger protein 112 |
|  | NAP1L2 | nucleosome assembly protein 1 like 2 |
|  | PARP2 | poly(ADP-ribose) polymerase 2 |
|  | NDRG2 | NDRG family member 2 |
|  | NUP43 | nucleoporin 43 |
|  | ACAD8 | acyl-CoA dehydrogenase family member 8 |
|  | VBP1 | VHL binding protein 1 |
|  | ENC1 | ectodermal-neural cortex 1 |
|  | PTP4A1 | protein tyrosine phosphatase 4A1 |
|  | ZNF222 | zinc finger protein 222 |
|  | LRPAP1 | LDL receptor related protein associated protein 1 |
|  | OAT | ornithine aminotransferase |
|  | CDKL3 | cyclin dependent kinase like 3 |
|  | PCNX4 | pecanex 4 |
|  | EP400 | E1A binding protein p400 |
|  | POLR3E | RNA polymerase III subunit E |
|  | FBXL5 | F-box and leucine rich repeat protein 5 |
|  | LUC7L | LUC7 like |
|  | ZNF117 | zinc finger protein 117 |
|  | RPRD1A | regulation of nuclear pre-mRNA domain containing 1A |
|  | RMDN3 | regulator of microtubule dynamics 3 |
|  | MYOZ1 | myozenin 1 |
|  | AREL1 | apoptosis resistant E3 ubiquitin protein ligase 1 |
|  | HOXA5 | homeobox A5 |
|  | RBM34 | RNA binding motif protein 34 |
|  | SC5D | sterol-C5-desaturase |
|  | HIVEP1 | HIVEP zinc finger 1 |
|  | ZKSCAN7 | zinc finger with KRAB and SCAN domains 7 |
|  | COPB1 | COPI coat complex subunit beta 1 |
|  | NME6 | NME/NM23 nucleoside diphosphate kinase 6 |
|  | DECR1 | 2,4-dienoyl-CoA reductase 1 |
|  | CNDP2 | carnosine dipeptidase 2 |
|  | EXTL2 | exostosin like glycosyltransferase 2 |
|  | CNGA1 | cyclic nucleotide gated channel subunit alpha 1 |
|  | MRPS28 | mitochondrial ribosomal protein S28 |
|  | GUCY1B1 | guanylate cyclase 1 soluble subunit beta 1 |
|  | GABRA2 | gamma-aminobutyric acid type A receptor subunit alpha2 |
|  | MATN3 | matrilin 3 |
|  | RRAS | RAS related |
|  | RUNX1T1 | RUNX1 partner transcriptional co-repressor 1 |
|  | VAPB | VAMP associated protein B and C |
|  | DYRK1A | dual specificity tyrosine phosphorylation regulated kinase 1A |
|  | SENP6 | SUMO specific peptidase 6 |
|  | TNFRSF10B | TNF receptor superfamily member 10b |
|  | SLC25A14 | solute carrier family 25 member 14 |
|  | CYLD | CYLD lysine 63 deubiquitinase |
|  | SPATA2 | spermatogenesis associated 2 |
|  | SEC63 | SEC63 homolog, protein translocation regulator |
|  | SEC24A | SEC24 homolog A, COPII coat complex component |
|  | ANGPT1 | angiopoietin 1 |
|  | SPEN | spen family transcriptional repressor |
|  | TP53BP1 | tumor protein p53 binding protein 1 |
|  | GNE | glucosamine (UDP-N-acetyl)-2-epimerase/N-acetylmannosamine kinase |
|  | HEATR1 | HEAT repeat containing 1 |
|  | GPR107 | G protein-coupled receptor 107 |
|  | ESF1 | ESF1 nucleolar pre-rRNA processing protein homolog |
|  | FASTKD5 | FAST kinase domains 5 |
|  | PPP6C | protein phosphatase 6 catalytic subunit |
|  | ERLIN2 | ER lipid raft associated 2 |
|  | TBCE | tubulin folding cofactor E |
|  | PPM1B | protein phosphatase, Mg2+/Mn2+ dependent 1B |
|  | TBC1D2B | TBC1 domain family member 2B |
|  | DIAPH2 | diaphanous related formin 2 |
|  | SFMBT1 | Scm like with four mbt domains 1 |
|  | BYSL | bystin like |
|  | C2CD3 | C2 domain containing 3 centriole elongation regulator |
|  | ACVR1 | activin A receptor type 1 |
|  | PAAF1 | proteasomal ATPase associated factor 1 |
|  | IRF6 | interferon regulatory factor 6 |
|  | SP2 | Sp2 transcription factor |
|  | EPS15 | epidermal growth factor receptor pathway substrate 15 |
|  | EIF3M | eukaryotic translation initiation factor 3 subunit M |
|  | HCP5 | HLA complex P5 |
|  | CDH17 | cadherin 17 |
|  | SRP9 | signal recognition particle 9 |
|  | PCDH9 | protocadherin 9 |
|  | MLLT11 | MLLT11 transcription factor 7 cofactor |
|  | RANBP9 | RAN binding protein 9 |
|  | MED23 | mediator complex subunit 23 |
|  | LEPROT | leptin receptor overlapping transcript |
|  | HTRA1 | HtrA serine peptidase 1 |
|  | ZNF394 | zinc finger protein 394 |
|  | PIGC | phosphatidylinositol glycan anchor biosynthesis class C |
|  | ZNF304 | zinc finger protein 304 |
|  | SAMD4A | sterile alpha motif domain containing 4A |
|  | RAB3GAP1 | RAB3 GTPase activating protein catalytic subunit 1 |
|  | NUP205 | nucleoporin 205 |
|  | H2BC5 | H2B clustered histone 5 |
|  | DNAJC13 | DnaJ heat shock protein family (Hsp40) member C13 |
|  | PDPN | podoplanin |
|  | ALG8 | ALG8 alpha-1,3-glucosyltransferase |
|  | RNF38 | ring finger protein 38 |
|  | MBIP | MAP3K12 binding inhibitory protein 1 |
|  | ATXN1 | ataxin 1 |
|  | OBSL1 | obscurin like cytoskeletal adaptor 1 |
|  | ABHD14A | abhydrolase domain containing 14A |
|  | NMRK1 | nicotinamide riboside kinase 1 |
|  | VEZF1 | vascular endothelial zinc finger 1 |
|  | C1orf50 | chromosome 1 open reading frame 50 |
|  | NARS1 | asparaginyl-tRNA synthetase 1 |
|  | PSMD12 | proteasome 26S subunit, non-ATPase 12 |
|  | RECK | reversion inducing cysteine rich protein with kazal motifs |
|  | PRORP | protein only RNase P catalytic subunit |
|  | FAM174B | family with sequence similarity 174 member B |
|  | MRPL58 | mitochondrial ribosomal protein L58 |
|  | SETD4 | SET domain containing 4 |
|  | PRMT3 | protein arginine methyltransferase 3 |
|  | TMEM260 | transmembrane protein 260 |
|  | ATF2 | activating transcription factor 2 |
|  | IGFBP1 | insulin like growth factor binding protein 1 |
|  | DYRK2 | dual specificity tyrosine phosphorylation regulated kinase 2 |
|  | SEPHS2 | selenophosphate synthetase 2 |
|  | BTD | biotinidase |
|  | SLC20A2 | solute carrier family 20 member 2 |
|  | PTPN21 | protein tyrosine phosphatase non-receptor type 21 |
|  | H2BC12 | H2B clustered histone 12 |
|  | FAT1 | FAT atypical cadherin 1 |
|  | TMEM231 | transmembrane protein 231 |
|  | TERF2IP | TERF2 interacting protein |
|  | PUS7 | pseudouridine synthase 7 |
|  | ASPA | aspartoacylase |
|  | TRIP11 | thyroid hormone receptor interactor 11 |
|  | BICD2 | BICD cargo adaptor 2 |
|  | MAK16 | MAK16 homolog |
|  | MEP1B | meprin A subunit beta |
|  | DPH2 | diphthamide biosynthesis 2 |
|  | MPHOSPH9 | M-phase phosphoprotein 9 |
|  | MAGEF1 | MAGE family member F1 |
|  | CHGB | chromogranin B |
|  | PROSER1 | proline and serine rich 1 |
|  | COMT | catechol-O-methyltransferase |
|  | PSENEN | presenilin enhancer, gamma-secretase subunit |
|  | UHRF1BP1L | UHRF1 binding protein 1 like |
|  | ARGLU1 | arginine and glutamate rich 1 |
|  | IQGAP2 | IQ motif containing GTPase activating protein 2 |
|  | CA10 | carbonic anhydrase 10 |
|  | STS | steroid sulfatase |
|  | SYNM | synemin |
|  | NR4A1 | nuclear receptor subfamily 4 group A member 1 |
|  | DERA | deoxyribose-phosphate aldolase |
|  | GPC5 | glypican 5 |
|  | SOCS5 | suppressor of cytokine signaling 5 |
|  | GALNT11 | polypeptide N-acetylgalactosaminyltransferase 11 |
|  | CRIM1 | cysteine rich transmembrane BMP regulator 1 |
|  | ABL1 | ABL proto-oncogene 1, non-receptor tyrosine kinase |
|  | ZNF302 | zinc finger protein 302 |
|  | EIF2B4 | eukaryotic translation initiation factor 2B subunit delta |
|  | CBX5 | chromobox 5 |
|  | TOMM6 | translocase of outer mitochondrial membrane 6 |
|  | PSMC2 | proteasome 26S subunit, ATPase 2 |
|  | UGGT2 | UDP-glucose glycoprotein glucosyltransferase 2 |
|  | RNFT2 | ring finger protein, transmembrane 2 |
|  | ATP6V1G1 | ATPase H+ transporting V1 subunit G1 |
|  | POLDIP2 | DNA polymerase delta interacting protein 2 |
|  | ZBTB7C | zinc finger and BTB domain containing 7C |
|  | CTNNAL1 | catenin alpha like 1 |
|  | NPC2 | NPC intracellular cholesterol transporter 2 |
|  | MRPL33 | mitochondrial ribosomal protein L33 |
|  | TOPBP1 | DNA topoisomerase II binding protein 1 |
|  | MCTP2 | multiple C2 and transmembrane domain containing 2 |
|  | TRMT11 | tRNA methyltransferase 11 homolog |
|  | EIF2S2 | eukaryotic translation initiation factor 2 subunit beta |
|  | PACRG | parkin coregulated |
|  | PDPR | pyruvate dehydrogenase phosphatase regulatory subunit |
|  | ZSCAN18 | zinc finger and SCAN domain containing 18 |
|  | TRIM2 | tripartite motif containing 2 |
|  | ZNF197 | zinc finger protein 197 |
|  | TMEM242 | transmembrane protein 242 |
|  | VAMP7 | vesicle associated membrane protein 7 |
|  | CCT8 | chaperonin containing TCP1 subunit 8 |
|  | GABARAPL1 | GABA type A receptor associated protein like 1 |
|  | H2AZ1 | H2A.Z variant histone 1 |
|  | ROCK1 | Rho associated coiled-coil containing protein kinase 1 |
|  | YPEL5 | yippee like 5 |
|  | CIAO2B | cytosolic iron-sulfur assembly component 2B |
|  | LAPTM4B | lysosomal protein transmembrane 4 beta |
|  | TMEM39A | transmembrane protein 39A |
|  | CHST1 | carbohydrate sulfotransferase 1 |
|  | BANK1 | B cell scaffold protein with ankyrin repeats 1 |
|  | ZNF266 | zinc finger protein 266 |
|  | NR2C1 | nuclear receptor subfamily 2 group C member 1 |
|  | TOX3 | TOX high mobility group box family member 3 |
|  | RNF111 | ring finger protein 111 |
|  | NUP98 | nucleoporin 98 and 96 precursor |
|  | EED | embryonic ectoderm development |
|  | CAP2 | cyclase associated actin cytoskeleton regulatory protein 2 |
|  | HLA-F-AS1 | HLA-F antisense RNA 1 |
|  | TASOR | transcription activation suppressor |
|  | TFB2M | transcription factor B2, mitochondrial |
|  | TTC1 | tetratricopeptide repeat domain 1 |
|  | NDUFAF3 | NADH:ubiquinone oxidoreductase complex assembly factor 3 |
|  | DHRS1 | dehydrogenase/reductase 1 |
|  | PERP | p53 apoptosis effector related to PMP22 |
|  | SPATA5L1 | spermatogenesis associated 5 like 1 |
|  | METAP1 | methionyl aminopeptidase 1 |
|  | SUMO1 | small ubiquitin like modifier 1 |
|  | MAN2A2 | mannosidase alpha class 2A member 2 |
|  | RAB3GAP2 | RAB3 GTPase activating non-catalytic protein subunit 2 |
|  | HCFC2 | host cell factor C2 |
|  | MT1F | metallothionein 1F |
|  | PLOD2 | procollagen-lysine,2-oxoglutarate 5-dioxygenase 2 |
|  | RGS7 | regulator of G protein signaling 7 |
|  | ARHGEF40 | Rho guanine nucleotide exchange factor 40 |
|  | TMEM39B | transmembrane protein 39B |
|  | ORC4 | origin recognition complex subunit 4 |
|  | BACE1 | beta-secretase 1 |
|  | ZNF586 | zinc finger protein 586 |
|  | IL6R | interleukin 6 receptor |
|  | LHFPL6 | LHFPL tetraspan subfamily member 6 |
|  | RGS4 | regulator of G protein signaling 4 |
|  | PRRC1 | proline rich coiled-coil 1 |
|  | ECT2 | epithelial cell transforming 2 |
|  | APOC3 | apolipoprotein C3 |
|  | ZNHIT6 | zinc finger HIT-type containing 6 |
|  | ASB6 | ankyrin repeat and SOCS box containing 6 |
|  | ELK4 | ETS transcription factor ELK4 |
|  | LRCH1 | leucine rich repeats and calponin homology domain containing 1 |
|  | VIPAS39 | VPS33B interacting protein, apical-basolateral polarity regulator, spe-39 homolog |
|  | PON2 | paraoxonase 2 |
|  | CAMLG | calcium modulating ligand |
|  | RGSL1 | regulator of G protein signaling like 1 |
|  | TMEM184C | transmembrane protein 184C |
|  | TXNDC9 | thioredoxin domain containing 9 |
|  | KIF2A | kinesin family member 2A |
|  | R3HDM1 | R3H domain containing 1 |
|  | KPNA4 | karyopherin subunit alpha 4 |
|  | RPP30 | ribonuclease P/MRP subunit p30 |
|  | DSTN | destrin, actin depolymerizing factor |
|  | MFSD11 | major facilitator superfamily domain containing 11 |
|  | ATP2A2 | ATPase sarcoplasmic/endoplasmic reticulum Ca2+ transporting 2 |
|  | LGR4 | leucine rich repeat containing G protein-coupled receptor 4 |
|  | ABCA5 | ATP binding cassette subfamily A member 5 |
|  | AGGF1 | angiogenic factor with G-patch and FHA domains 1 |
|  | KLK7 | kallikrein related peptidase 7 |
|  | CLIC1 | chloride intracellular channel 1 |
|  | GOLPH3L | golgi phosphoprotein 3 like |
|  | TM9SF1 | transmembrane 9 superfamily member 1 |
|  | COQ6 | coenzyme Q6, monooxygenase |
|  | LYST | lysosomal trafficking regulator |
|  | GIN1 | gypsy retrotransposon integrase 1 |
|  | MCMBP | minichromosome maintenance complex binding protein |
|  | ZNF451 | zinc finger protein 451 |
|  | SLC25A38 | solute carrier family 25 member 38 |
|  | NIPSNAP2 | nipsnap homolog 2 |
|  | UQCRB | ubiquinol-cytochrome c reductase binding protein |
|  | NHEJ1 | non-homologous end joining factor 1 |
|  | FANCF | FA complementation group F |
|  | TXNL1 | thioredoxin like 1 |
|  | OXSM | 3-oxoacyl-ACP synthase, mitochondrial |
|  | ANKRD46 | ankyrin repeat domain 46 |
|  | THADA | THADA armadillo repeat containing |
|  | FHL2 | four and a half LIM domains 2 |
|  | CYTH2 | cytohesin 2 |
|  | VLDLR | very low density lipoprotein receptor |
|  | ZNF557 | zinc finger protein 557 |
|  | C17orf75 | chromosome 17 open reading frame 75 |
|  | INHBC | inhibin subunit beta C |
|  | RYR3 | ryanodine receptor 3 |
|  | MTERF3 | mitochondrial transcription termination factor 3 |
|  | NDUFAF4 | NADH:ubiquinone oxidoreductase complex assembly factor 4 |
|  | SMIM10L1 | small integral membrane protein 10 like 1 |
|  | KCNE4 | potassium voltage-gated channel subfamily E regulatory subunit 4 |
|  | DCAF8 | DDB1 and CUL4 associated factor 8 |
|  | STAU1 | staufen double-stranded RNA binding protein 1 |
|  | SLC2A1 | solute carrier family 2 member 1 |
|  | HDDC2 | HD domain containing 2 |
|  | CCDC85C | coiled-coil domain containing 85C |
|  | TSKU | tsukushi, small leucine rich proteoglycan |
|  | CREB1 | cAMP responsive element binding protein 1 |
|  | NBEA | neurobeachin |
|  | ETAA1 | ETAA1 activator of ATR kinase |
|  | TIMM17A | translocase of inner mitochondrial membrane 17A |
|  | TUBB6 | tubulin beta 6 class V |
|  | AUH | AU RNA binding methylglutaconyl-CoA hydratase |
|  | PODXL | podocalyxin like |
|  | MFSD5 | major facilitator superfamily domain containing 5 |
| up-regulated DEGs in only LN | IFITM1 | interferon induced transmembrane protein 1 |
|  | IFI16 | interferon gamma inducible protein 16 |
|  | MS4A4A | membrane spanning 4-domains A4A |
|  | CD163 | CD163 molecule |
|  | C1QA | complement C1q A chain |
|  | LIPA | lipase A, lysosomal acid type |
|  | LY6E | lymphocyte antigen 6 family member E |
|  | C3AR1 | complement C3a receptor 1 |
|  | IFI27 | interferon alpha inducible protein 27 |
|  | PTPRC | protein tyrosine phosphatase receptor type C |
|  | TRANK1 | tetratricopeptide repeat and ankyrin repeat containing 1 |
|  | MS4A6A | membrane spanning 4-domains A6A |
|  | ADAP2 | ArfGAP with dual PH domains 2 |
|  | LYN | LYN proto-oncogene, Src family tyrosine kinase |
|  | TCF4 | transcription factor 4 |
|  | CD53 | CD53 molecule |
|  | ISG15 | ISG15 ubiquitin like modifier |
|  | LY86 | lymphocyte antigen 86 |
|  | HCLS1 | hematopoietic cell-specific Lyn substrate 1 |
|  | C1QB | complement C1q B chain |
|  | CCR1 | C-C motif chemokine receptor 1 |
|  | NCKAP1L | NCK associated protein 1 like |
|  | CD14 | CD14 molecule |
|  | CHST15 | carbohydrate sulfotransferase 15 |
|  | ITGB2 | integrin subunit beta 2 |
|  | IFI30 | IFI30 lysosomal thiol reductase |
|  | ENTPD1 | ectonucleoside triphosphate diphosphohydrolase 1 |
|  | SLC1A3 | solute carrier family 1 member 3 |
|  | TYROBP | transmembrane immune signaling adaptor TYROBP |
|  | IRF9 | interferon regulatory factor 9 |
|  | CD300A | CD300a molecule |
|  | IRF7 | interferon regulatory factor 7 |
|  | CASP1 | caspase 1 |
|  | TLR2 | toll like receptor 2 |
|  | VSIG4 | V-set and immunoglobulin domain containing 4 |
|  | CLEC7A | C-type lectin domain containing 7A |
|  | LY96 | lymphocyte antigen 96 |
|  | THEMIS2 | thymocyte selection associated family member 2 |
|  | APOBEC3G | apolipoprotein B mRNA editing enzyme catalytic subunit 3G |
|  | DHRS9 | dehydrogenase/reductase 9 |
|  | APOBEC3A | apolipoprotein B mRNA editing enzyme catalytic subunit 3A |
|  | PLEK | pleckstrin |
|  | RNASE6 | ribonuclease A family member k6 |
|  | LCP1 | lymphocyte cytosolic protein 1 |
|  | ADGRL2 | adhesion G protein-coupled receptor L2 |
|  | A2M | alpha-2-macroglobulin |
|  | PTPRE | protein tyrosine phosphatase receptor type E |
|  | FCER1G | Fc epsilon receptor Ig |
|  | CTSS | cathepsin S |
|  | SERPING1 | serpin family G member 1 |
|  | HCK | HCK proto-oncogene, Src family tyrosine kinase |
|  | SAMSN1 | SAM domain, SH3 domain and nuclear localization signals 1 |
|  | RHOG | ras homolog family member G |
|  | ZNF267 | zinc finger protein 267 |
|  | NAGK | N-acetylglucosamine kinase |
|  | LGALS3BP | galectin 3 binding protein |
|  | EBI3 | Epstein-Barr virus induced 3 |
|  | IL10RA | interleukin 10 receptor subunit alpha |
|  | LHFPL2 | LHFPL tetraspan subfamily member 2 |
|  | LAIR1 | leukocyte associated immunoglobulin like receptor 1 |
|  | GBP2 | guanylate binding protein 2 |
|  | ADA | adenosine deaminase |
|  | CYBB | cytochrome b-245 beta chain |
|  | MPP1 | MAGUK p55 scaffold protein 1 |
|  | GPR65 | G protein-coupled receptor 65 |
|  | C1S | complement C1s |
|  | LCP2 | lymphocyte cytosolic protein 2 |
|  | EVI2B | ecotropic viral integration site 2B |
|  | CD86 | CD86 molecule |
|  | ZNF217 | zinc finger protein 217 |
|  | CNP | 2',3'-cyclic nucleotide 3' phosphodiesterase |
|  | CCR5 | C-C motif chemokine receptor 5 |
|  | PECAM1 | platelet and endothelial cell adhesion molecule 1 |
|  | FHL5 | four and a half LIM domains 5 |
|  | CD36 | CD36 molecule |
|  | FPR3 | formyl peptide receptor 3 |
|  | PSMB9 | proteasome 20S subunit beta 9 |
|  | SRGN | serglycin |
|  | CLEC2B | C-type lectin domain family 2 member B |
|  | TATDN2 | TatD DNase domain containing 2 |
|  | DENR | density regulated re-initiation and release factor |
|  | BID | BH3 interacting domain death agonist |
|  | HMOX1 | heme oxygenase 1 |
|  | EMP3 | epithelial membrane protein 3 |
|  | PYCARD | PYD and CARD domain containing |
|  | MCUB | mitochondrial calcium uniporter dominant negative subunit beta |
|  | CNOT8 | CCR4-NOT transcription complex subunit 8 |
|  | SLC15A3 | solute carrier family 15 member 3 |
|  | CD300C | CD300c molecule |
|  | CPVL | carboxypeptidase vitellogenic like |
|  | HNRNPD | heterogeneous nuclear ribonucleoprotein D |
|  | TUT7 | terminal uridylyl transferase 7 |
|  | PIEZO2 | piezo type mechanosensitive ion channel component 2 |
|  | PAK2 | p21 (RAC1) activated kinase 2 |
|  | CORO1A | coronin 1A |
|  | DUSP2 | dual specificity phosphatase 2 |
|  | AK2 | adenylate kinase 2 |
|  | NCF4 | neutrophil cytosolic factor 4 |
|  | CTSL | cathepsin L |
|  | PELI1 | pellino E3 ubiquitin protein ligase 1 |
|  | CD83 | CD83 molecule |
|  | ARHGAP25 | Rho GTPase activating protein 25 |
|  | RNASET2 | ribonuclease T2 |
|  | CKLF | chemokine like factor |
|  | CYTIP | cytohesin 1 interacting protein |
|  | AOAH | acyloxyacyl hydrolase |
|  | SWAP70 | switching B cell complex subunit SWAP70 |
|  | PSAP | prosaposin |
|  | ARID4B | AT-rich interaction domain 4B |
|  | AGO1 | argonaute RISC component 1 |
|  | NETO2 | neuropilin and tolloid like 2 |
|  | CCRL2 | C-C motif chemokine receptor like 2 |
|  | GLIPR1 | GLI pathogenesis related 1 |
|  | LIMS1 | LIM zinc finger domain containing 1 |
|  | DOCK2 | dedicator of cytokinesis 2 |
|  | CRYBG1 | crystallin beta-gamma domain containing 1 |
|  | SLC1A4 | solute carrier family 1 member 4 |
|  | TREM2 | triggering receptor expressed on myeloid cells 2 |
|  | TBC1D12 | TBC1 domain family member 12 |
|  | LILRB1 | leukocyte immunoglobulin like receptor B1 |
|  | REV3L | REV3 like, DNA directed polymerase zeta catalytic subunit |
|  | ACSL5 | acyl-CoA synthetase long chain family member 5 |
|  | RB1 | RB transcriptional corepressor 1 |
|  | TMEM30A | transmembrane protein 30A |
|  | NPL | N-acetylneuraminate pyruvate lyase |
|  | FRZB | frizzled related protein |
|  | FRAT2 | FRAT regulator of WNT signaling pathway 2 |
|  | ADCY7 | adenylate cyclase 7 |
|  | PILRA | paired immunoglobin like type 2 receptor alpha |
|  | RASSF2 | Ras association domain family member 2 |
|  | MBNL1 | muscleblind like splicing regulator 1 |
|  | ATF1 | activating transcription factor 1 |
|  | CHFR | checkpoint with forkhead and ring finger domains |
|  | BNIP2 | BCL2 interacting protein 2 |
|  | HERC1 | HECT and RLD domain containing E3 ubiquitin protein ligase family member 1 |
|  | TRAFD1 | TRAF-type zinc finger domain containing 1 |
|  | HLA-DPA1 | major histocompatibility complex, class II, DP alpha 1 |
|  | MMRN2 | multimerin 2 |
|  | LPXN | leupaxin |
|  | ARHGEF6 | Rac/Cdc42 guanine nucleotide exchange factor 6 |
|  | FGL2 | fibrinogen like 2 |
|  | ZC3HAV1 | zinc finger CCCH-type containing, antiviral 1 |
|  | SMCHD1 | structural maintenance of chromosomes flexible hinge domain containing 1 |
|  | PSMD7 | proteasome 26S subunit, non-ATPase 7 |
|  | DOK2 | docking protein 2 |
|  | SLC26A2 | solute carrier family 26 member 2 |
|  | NAMPT | nicotinamide phosphoribosyltransferase |
|  | CASP3 | caspase 3 |
|  | ANP32E | acidic nuclear phosphoprotein 32 family member E |
|  | CEP350 | centrosomal protein 350 |
|  | LGMN | legumain |
|  | RAB8B | RAB8B, member RAS oncogene family |
|  | CASP8 | caspase 8 |
|  | NCF2 | neutrophil cytosolic factor 2 |
|  | CLIC2 | chloride intracellular channel 2 |
|  | TMEM268 | transmembrane protein 268 |
|  | GLG1 | golgi glycoprotein 1 |
|  | SOD2 | superoxide dismutase 2 |
|  | ADGRL4 | adhesion G protein-coupled receptor L4 |
|  | VMP1 | vacuole membrane protein 1 |
|  | BCL2A1 | BCL2 related protein A1 |
|  | MACROH2A1 | macroH2A.1 histone |
|  | PTGS1 | prostaglandin-endoperoxide synthase 1 |
|  | RGCC | regulator of cell cycle |
|  | IRF8 | interferon regulatory factor 8 |
|  | AGPS | alkylglycerone phosphate synthase |
|  | SLC43A3 | solute carrier family 43 member 3 |
|  | CFLAR | CASP8 and FADD like apoptosis regulator |
|  | LAMA3 | laminin subunit alpha 3 |
|  | POSTN | periostin |
|  | ADORA3 | adenosine A3 receptor |
|  | CD48 | CD48 molecule |
|  | TFRC | transferrin receptor |
|  | EPB41L3 | erythrocyte membrane protein band 4.1 like 3 |
|  | SERPINB8 | serpin family B member 8 |
|  | NIBAN1 | niban apoptosis regulator 1 |
|  | SYNRG | synergin gamma |
|  | APOL3 | apolipoprotein L3 |
|  | GAR1 | GAR1 ribonucleoprotein |
|  | GCNT1 | glucosaminyl (N-acetyl) transferase 1 |
|  | M6PR | mannose-6-phosphate receptor, cation dependent |
|  | PTPN6 | protein tyrosine phosphatase non-receptor type 6 |
|  | ATAD2B | ATPase family AAA domain containing 2B |
|  | SNTB2 | syntrophin beta 2 |
|  | ACAP2 | ArfGAP with coiled-coil, ankyrin repeat and PH domains 2 |
|  | RCOR1 | REST corepressor 1 |
|  | PSME1 | proteasome activator subunit 1 |
|  | ADIPOR2 | adiponectin receptor 2 |
|  | USP15 | ubiquitin specific peptidase 15 |
|  | CXCR4 | C-X-C motif chemokine receptor 4 |
|  | MSN | moesin |
|  | CYRIB | CYFIP related Rac1 interactor B |
|  | GRN | granulin precursor |
|  | SLC39A6 | solute carrier family 39 member 6 |
|  | NCK1 | NCK adaptor protein 1 |
|  | ACTL6A | actin like 6A |
|  | TAP1 | transporter 1, ATP binding cassette subfamily B member |
|  | PRKCB | protein kinase C beta |
|  | ITGAM | integrin subunit alpha M |
|  | PPM1D | protein phosphatase, Mg2+/Mn2+ dependent 1D |
|  | EVI2A | ecotropic viral integration site 2A |
|  | RPF1 | ribosome production factor 1 homolog |
|  | OSBPL11 | oxysterol binding protein like 11 |
|  | RAC2 | Rac family small GTPase 2 |
|  | MEF2C | myocyte enhancer factor 2C |
|  | FCGR3B | Fc gamma receptor IIIb |
|  | HLA-B | major histocompatibility complex, class I, B |
|  | ME2 | malic enzyme 2 |
|  | RGS19 | regulator of G protein signaling 19 |
|  | OBI1 | ORC ubiquitin ligase 1 |
|  | PID1 | phosphotyrosine interaction domain containing 1 |
|  | NECAP2 | NECAP endocytosis associated 2 |
|  | RAPGEF5 | Rap guanine nucleotide exchange factor 5 |
|  | NAGA | alpha-N-acetylgalactosaminidase |
|  | STK10 | serine/threonine kinase 10 |
|  | EPHA4 | EPH receptor A4 |
|  | PPP1R2 | protein phosphatase 1 regulatory inhibitor subunit 2 |
|  | CCL4 | C-C motif chemokine ligand 4 |
|  | TIMP2 | TIMP metallopeptidase inhibitor 2 |
|  | IFNGR1 | interferon gamma receptor 1 |
|  | IFI35 | interferon induced protein 35 |
|  | SECTM1 | secreted and transmembrane 1 |
|  | HK3 | hexokinase 3 |
|  | JPT1 | Jupiter microtubule associated homolog 1 |
|  | SP140L | SP140 nuclear body protein like |
|  | TMEM131L | transmembrane 131 like |
|  | GMIP | GEM interacting protein |
|  | CTSB | cathepsin B |
|  | AQP9 | aquaporin 9 |
|  | WASHC4 | WASH complex subunit 4 |
|  | MTHFD2 | methylenetetrahydrofolate dehydrogenase (NADP+ dependent) 2, methenyltetrahydrofolate cyclohydrolase |
|  | MAPKAPK5 | MAPK activated protein kinase 5 |
|  | FTH1 | ferritin heavy chain 1 |
|  | SLC39A8 | solute carrier family 39 member 8 |
|  | TNFRSF1B | TNF receptor superfamily member 1B |
|  | RESF1 | retroelement silencing factor 1 |
|  | PSTPIP2 | proline-serine-threonine phosphatase interacting protein 2 |
|  | GLUL | glutamate-ammonia ligase |
|  | COQ2 | coenzyme Q2, polyprenyltransferase |
|  | APP | amyloid beta precursor protein |
|  | ADAM10 | ADAM metallopeptidase domain 10 |
|  | PPARG | peroxisome proliferator activated receptor gamma |
|  | MOB1A | MOB kinase activator 1A |
|  | CNOT7 | CCR4-NOT transcription complex subunit 7 |
|  | CALM3 | calmodulin 3 |
|  | PTEN | phosphatase and tensin homolog |
|  | WIPF1 | WAS/WASL interacting protein family member 1 |
|  | CYTH4 | cytohesin 4 |
|  | IRAG2 | inositol 1,4,5-triphosphate receptor associated 2 |
|  | THUMPD1 | THUMP domain containing 1 |
|  | TRAF6 | TNF receptor associated factor 6 |
|  | ELF1 | E74 like ETS transcription factor 1 |
|  | FPR1 | formyl peptide receptor 1 |
|  | JAK1 | Janus kinase 1 |
|  | RAP2B | RAP2B, member of RAS oncogene family |
|  | C5orf22 | chromosome 5 open reading frame 22 |
|  | GRB2 | growth factor receptor bound protein 2 |
|  | BAZ1A | bromodomain adjacent to zinc finger domain 1A |
|  | CD44 | CD44 molecule (Indian blood group) |
|  | PLAUR | plasminogen activator, urokinase receptor |
|  | GNAI3 | G protein subunit alpha i3 |
|  | CHRDL1 | chordin like 1 |
|  | TAP2 | transporter 2, ATP binding cassette subfamily B member |
|  | KYNU | kynureninase |
|  | NADK | NAD kinase |
|  | PPT1 | palmitoyl-protein thioesterase 1 |
|  | FPR2 | formyl peptide receptor 2 |
|  | CSF1R | colony stimulating factor 1 receptor |
|  | FBXO5 | F-box protein 5 |
|  | BTK | Bruton tyrosine kinase |
|  | FTL | ferritin light chain |
|  | EPB41L2 | erythrocyte membrane protein band 4.1 like 2 |
|  | ZNF146 | zinc finger protein 146 |
|  | KCTD5 | potassium channel tetramerization domain containing 5 |
|  | SRPX | sushi repeat containing protein X-linked |
|  | RPS6KA5 | ribosomal protein S6 kinase A5 |
|  | ARMT1 | acidic residue methyltransferase 1 |
|  | UBE2E1 | ubiquitin conjugating enzyme E2 E1 |
|  | HECA | hdc homolog, cell cycle regulator |
|  | CSTA | cystatin A |
|  | LYZ | lysozyme |
|  | RHBDF2 | rhomboid 5 homolog 2 |
|  | UCP2 | uncoupling protein 2 |
|  | SDS | serine dehydratase |
|  | SH3BGRL3 | SH3 domain binding glutamate rich protein like 3 |
|  | CMTM6 | CKLF like MARVEL transmembrane domain containing 6 |
|  | KLHL7 | kelch like family member 7 |
|  | CBFB | core-binding factor subunit beta |
|  | SELENOF | selenoprotein F |
|  | RFC3 | replication factor C subunit 3 |
|  | ATP6V1C1 | ATPase H+ transporting V1 subunit C1 |
|  | FOLR2 | folate receptor beta |
|  | SLCO4A1 | solute carrier organic anion transporter family member 4A1 |
|  | MED1 | mediator complex subunit 1 |
|  | SCARB2 | scavenger receptor class B member 2 |
|  | LAT2 | linker for activation of T cells family member 2 |
|  | CYB5R4 | cytochrome b5 reductase 4 |
|  | TIPRL | TOR signaling pathway regulator |
|  | TNKS2 | tankyrase 2 |
|  | FGR | FGR proto-oncogene, Src family tyrosine kinase |
|  | CCDC88A | coiled-coil domain containing 88A |
|  | WAPL | WAPL cohesin release factor |
|  | SCML1 | Scm polycomb group protein like 1 |
|  | LGALS3 | galectin 3 |
|  | DDX21 | DExD-box helicase 21 |
|  | SLC25A28 | solute carrier family 25 member 28 |
|  | GMFG | glia maturation factor gamma |
|  | ACSL1 | acyl-CoA synthetase long chain family member 1 |
|  | TREM1 | triggering receptor expressed on myeloid cells 1 |
|  | SPHK1 | sphingosine kinase 1 |
|  | CHCHD3 | coiled-coil-helix-coiled-coil-helix domain containing 3 |
|  | MAN2B1 | mannosidase alpha class 2B member 1 |
|  | GLA | galactosidase alpha |
|  | NINJ2 | ninjurin 2 |
|  | PLSCR4 | phospholipid scramblase 4 |
|  | C5AR1 | complement C5a receptor 1 |
|  | CALCRL | calcitonin receptor like receptor |
|  | RHOA | ras homolog family member A |
|  | PRKX | protein kinase X-linked |
|  | MYCBP2 | MYC binding protein 2 |
|  | CHST7 | carbohydrate sulfotransferase 7 |
|  | PIK3R1 | phosphoinositide-3-kinase regulatory subunit 1 |
|  | BTN3A3 | butyrophilin subfamily 3 member A3 |
|  | COL21A1 | collagen type XXI alpha 1 chain |
|  | ZNF45 | zinc finger protein 45 |
|  | NLRP3 | NLR family pyrin domain containing 3 |
|  | TRAM1 | translocation associated membrane protein 1 |
|  | PLA1A | phospholipase A1 member A |
|  | SELL | selectin L |
|  | BASP1 | brain abundant membrane attached signal protein 1 |
|  | RPE | ribulose-5-phosphate-3-epimerase |
|  | SPTLC2 | serine palmitoyltransferase long chain base subunit 2 |
|  | ARPC2 | actin related protein 2/3 complex subunit 2 |
|  | MARCKS | myristoylated alanine rich protein kinase C substrate |
|  | RNF13 | ring finger protein 13 |
|  | SLCO3A1 | solute carrier organic anion transporter family member 3A1 |
|  | TENT5A | terminal nucleotidyltransferase 5A |
|  | CELF2 | CUGBP Elav-like family member 2 |
|  | SMARCA2 | SWI/SNF related, matrix associated, actin dependent regulator of chromatin, subfamily a, member 2 |
|  | SLC35G2 | solute carrier family 35 member G2 |
|  | MRPL42 | mitochondrial ribosomal protein L42 |
|  | GNG11 | G protein subunit gamma 11 |
|  | SH2B3 | SH2B adaptor protein 3 |
|  | ATP11B | ATPase phospholipid transporting 11B (putative) |
|  | COL4A1 | collagen type IV alpha 1 chain |
|  | SLC25A24 | solute carrier family 25 member 24 |
|  | APOL1 | apolipoprotein L1 |
|  | TBC1D9 | TBC1 domain family member 9 |
|  | PYGL | glycogen phosphorylase L |
|  | TM6SF1 | transmembrane 6 superfamily member 1 |
|  | STAG2 | stromal antigen 2 |
|  | C2 | complement C2 |
|  | SPRY1 | sprouty RTK signaling antagonist 1 |
|  | ZNF148 | zinc finger protein 148 |
|  | RNF114 | ring finger protein 114 |
|  | PCLAF | PCNA clamp associated factor |
|  | HIF1A | hypoxia inducible factor 1 subunit alpha |
|  | CALHM2 | calcium homeostasis modulator family member 2 |
|  | CCL8 | C-C motif chemokine ligand 8 |
|  | B3GALNT1 | beta-1,3-N-acetylgalactosaminyltransferase 1 (globoside blood group) |
|  | CEBPB | CCAAT enhancer binding protein beta |
|  | PPP2R5C | protein phosphatase 2 regulatory subunit B'gamma |
|  | BLVRA | biliverdin reductase A |
|  | MT2A | metallothionein 2A |
|  | ABI1 | abl interactor 1 |
|  | PHF21A | PHD finger protein 21A |
|  | SMC1A | structural maintenance of chromosomes 1A |
|  | MAGOH | mago homolog, exon junction complex subunit |
|  | IL18R1 | interleukin 18 receptor 1 |
|  | FLVCR2 | FLVCR heme transporter 2 |
|  | CRTC3 | CREB regulated transcription coactivator 3 |
|  | NME1 | NME/NM23 nucleoside diphosphate kinase 1 |
|  | TRAF1 | TNF receptor associated factor 1 |
|  | TYMP | thymidine phosphorylase |
|  | IER5 | immediate early response 5 |
|  | ADPGK | ADP dependent glucokinase |
|  | NNMT | nicotinamide N-methyltransferase |
|  | CRLF3 | cytokine receptor like factor 3 |
|  | OGFRL1 | opioid growth factor receptor like 1 |
|  | POLE3 | DNA polymerase epsilon 3, accessory subunit |
|  | REEP4 | receptor accessory protein 4 |
|  | PRELID3B | PRELI domain containing 3B |
|  | SMCO4 | single-pass membrane protein with coiled-coil domains 4 |
|  | TANK | TRAF family member associated NFKB activator |
|  | SLAMF7 | SLAM family member 7 |
|  | DEK | DEK proto-oncogene |
|  | UBP1 | upstream binding protein 1 |
|  | HLA-E | major histocompatibility complex, class I, E |
|  | PRKCH | protein kinase C eta |
|  | GABPB1 | GA binding protein transcription factor subunit beta 1 |
|  | OSBPL8 | oxysterol binding protein like 8 |
|  | PDGFRA | platelet derived growth factor receptor alpha |
|  | PPM1G | protein phosphatase, Mg2+/Mn2+ dependent 1G |
|  | ARPC1B | actin related protein 2/3 complex subunit 1B |
|  | OPN3 | opsin 3 |
|  | NBN | nibrin |
|  | MATR3 | matrin 3 |
|  | IQCB1 | IQ motif containing B1 |
|  | ZFP36 | ZFP36 ring finger protein |
|  | DR1 | down-regulator of transcription 1 |
|  | OSBPL9 | oxysterol binding protein like 9 |
|  | PRKCD | protein kinase C delta |
|  | HESX1 | HESX homeobox 1 |
|  | TAOK3 | TAO kinase 3 |
|  | RAB20 | RAB20, member RAS oncogene family |
|  | LSM6 | LSM6 homolog, U6 small nuclear RNA and mRNA degradation associated |
|  | CCDC47 | coiled-coil domain containing 47 |
|  | RMI1 | RecQ mediated genome instability 1 |
|  | MFNG | MFNG O-fucosylpeptide 3-beta-N-acetylglucosaminyltransferase |
|  | LPL | lipoprotein lipase |
|  | SNIP1 | Smad nuclear interacting protein 1 |
|  | PRPF4B | pre-mRNA processing factor 4B |
|  | INPP1 | inositol polyphosphate-1-phosphatase |
|  | TASOR2 | transcription activation suppressor family member 2 |
|  | DOCK10 | dedicator of cytokinesis 10 |
|  | BCLAF1 | BCL2 associated transcription factor 1 |
|  | PROS1 | protein S |
|  | NIPBL | NIPBL cohesin loading factor |
|  | TMX1 | thioredoxin related transmembrane protein 1 |
|  | NOL11 | nucleolar protein 11 |
|  | CD72 | CD72 molecule |
|  | STK38L | serine/threonine kinase 38 like |
|  | EMG1 | EMG1 N1-specific pseudouridine methyltransferase |
|  | SASH3 | SAM and SH3 domain containing 3 |
|  | DDX39A | DExD-box helicase 39A |
|  | PLAT | plasminogen activator, tissue type |
|  | UTP25 | UTP25 small subunit processor component |
|  | PHACTR2 | phosphatase and actin regulator 2 |
|  | TCERG1 | transcription elongation regulator 1 |
|  | CASP4 | caspase 4 |
|  | TIMELESS | timeless circadian regulator |
|  | ZEB2 | zinc finger E-box binding homeobox 2 |
|  | ATP13A3 | ATPase 13A3 |
|  | PCOLCE | procollagen C-endopeptidase enhancer |
|  | UVRAG | UV radiation resistance associated |
|  | RNF141 | ring finger protein 141 |
| down-regulated DEGs in only LN | HIPK2 | homeodomain interacting protein kinase 2 |
|  | KIF1C | kinesin family member 1C |
|  | IQSEC3 | IQ motif and Sec7 domain ArfGEF 3 |
|  | SORBS3 | sorbin and SH3 domain containing 3 |
|  | KATNIP | katanin interacting protein |
|  | ACAD10 | acyl-CoA dehydrogenase family member 10 |
|  | FAAH | fatty acid amide hydrolase |
|  | SMAD6 | SMAD family member 6 |
|  | ATP9B | ATPase phospholipid transporting 9B (putative) |
|  | SPACA9 | sperm acrosome associated 9 |
|  | JMJD7 | jumonji domain containing 7 |
|  | GPAA1 | glycosylphosphatidylinositol anchor attachment 1 |
|  | NSMF | NMDA receptor synaptonuclear signaling and neuronal migration factor |
|  | AGBL5 | AGBL carboxypeptidase 5 |
|  | MYH9 | myosin heavy chain 9 |
|  | PARVA | parvin alpha |
|  | VILL | villin like |
|  | SLC9A3R1 | SLC9A3 regulator 1 |
|  | MYBPH | myosin binding protein H |
|  | ZNF91 | zinc finger protein 91 |
|  | MYOZ3 | myozenin 3 |
|  | MYF5 | myogenic factor 5 |
|  | IPO13 | importin 13 |
|  | PDZD7 | PDZ domain containing 7 |
|  | CHD3 | chromodomain helicase DNA binding protein 3 |
|  | FOXJ1 | forkhead box J1 |
|  | PDK2 | pyruvate dehydrogenase kinase 2 |
|  | CDK2AP2 | cyclin dependent kinase 2 associated protein 2 |
|  | PTPN3 | protein tyrosine phosphatase non-receptor type 3 |
|  | SNPH | syntaphilin |
|  | PTH1R | parathyroid hormone 1 receptor |
|  | EFNA2 | ephrin A2 |
|  | UBOX5 | U-box domain containing 5 |
|  | CDK16 | cyclin dependent kinase 16 |
|  | ZNHIT2 | zinc finger HIT-type containing 2 |
|  | SPTAN1 | spectrin alpha, non-erythrocytic 1 |
|  | FAM114A1 | family with sequence similarity 114 member A1 |
|  | ST3GAL1 | ST3 beta-galactoside alpha-2,3-sialyltransferase 1 |
|  | CHGA | chromogranin A |
|  | ZMYND10 | zinc finger MYND-type containing 10 |
|  | NR2F6 | nuclear receptor subfamily 2 group F member 6 |
|  | CFAP410 | cilia and flagella associated protein 410 |
|  | GRIN1 | glutamate ionotropic receptor NMDA type subunit 1 |
|  | EVX1 | even-skipped homeobox 1 |
|  | PMEPA1 | prostate transmembrane protein, androgen induced 1 |
|  | INPP5J | inositol polyphosphate-5-phosphatase J |
|  | HCFC1R1 | host cell factor C1 regulator 1 |
|  | ZMYM3 | zinc finger MYM-type containing 3 |
|  | B9D1 | B9 domain containing 1 |
|  | MYO15B | myosin XVB |
|  | ANKRD28 | ankyrin repeat domain 28 |
|  | NCOR2 | nuclear receptor corepressor 2 |
|  | CXCL14 | C-X-C motif chemokine ligand 14 |
|  | TNNC2 | troponin C2, fast skeletal type |
|  | S100A13 | S100 calcium binding protein A13 |
|  | SGSM2 | small G protein signaling modulator 2 |
|  | PPME1 | protein phosphatase methylesterase 1 |
|  | MYO1C | myosin IC |
|  | TPCN1 | two pore segment channel 1 |
|  | FGF14 | fibroblast growth factor 14 |
|  | SEMA3B | semaphorin 3B |
|  | IL11 | interleukin 11 |
|  | FAM3A | FAM3 metabolism regulating signaling molecule A |
|  | GAS1 | growth arrest specific 1 |
|  | CALCOCO1 | calcium binding and coiled-coil domain 1 |
|  | CACNB2 | calcium voltage-gated channel auxiliary subunit beta 2 |
|  | CYTH3 | cytohesin 3 |
|  | DHCR7 | 7-dehydrocholesterol reductase |
|  | GAB2 | GRB2 associated binding protein 2 |
|  | SLC7A4 | solute carrier family 7 member 4 |
|  | C1orf21 | chromosome 1 open reading frame 21 |
|  | CDC42EP1 | CDC42 effector protein 1 |
|  | CSRP1 | cysteine and glycine rich protein 1 |
|  | PPP2R5B | protein phosphatase 2 regulatory subunit B'beta |
|  | FKBP2 | FKBP prolyl isomerase 2 |
|  | DDN | dendrin |
|  | ACAA2 | acetyl-CoA acyltransferase 2 |
|  | EXTL3 | exostosin like glycosyltransferase 3 |
|  | PHYHIP | phytanoyl-CoA 2-hydroxylase interacting protein |
|  | HDAC6 | histone deacetylase 6 |
|  | HECTD3 | HECT domain E3 ubiquitin protein ligase 3 |
|  | MAN1A2 | mannosidase alpha class 1A member 2 |
|  | SHC2 | SHC adaptor protein 2 |
|  | EPS8L1 | EPS8 like 1 |
|  | LRRC2 | leucine rich repeat containing 2 |
|  | SSH3 | slingshot protein phosphatase 3 |
|  | MFSD12 | major facilitator superfamily domain containing 12 |
|  | ARHGAP32 | Rho GTPase activating protein 32 |
|  | ABCA3 | ATP binding cassette subfamily A member 3 |
|  | TMEM214 | transmembrane protein 214 |
|  | ASB1 | ankyrin repeat and SOCS box containing 1 |
|  | JUP | junction plakoglobin |
|  | MYL3 | myosin light chain 3 |
|  | LMF1 | lipase maturation factor 1 |
|  | GTF3C1 | general transcription factor IIIC subunit 1 |
|  | GNB5 | G protein subunit beta 5 |
|  | PDE4C | phosphodiesterase 4C |
|  | SCAMP4 | secretory carrier membrane protein 4 |
|  | UNC13B | unc-13 homolog B |
|  | IGF2-AS | IGF2 antisense RNA |
|  | ACOT11 | acyl-CoA thioesterase 11 |
|  | HIGD2A | HIG1 hypoxia inducible domain family member 2A |
|  | POLD2 | DNA polymerase delta 2, accessory subunit |
|  | CYB5R3 | cytochrome b5 reductase 3 |
|  | ANAPC2 | anaphase promoting complex subunit 2 |
|  | CA11 | carbonic anhydrase 11 |
|  | COG7 | component of oligomeric golgi complex 7 |
|  | RGS9 | regulator of G protein signaling 9 |
|  | TMEM222 | transmembrane protein 222 |
|  | AK1 | adenylate kinase 1 |
|  | YIPF2 | Yip1 domain family member 2 |
|  | CADM4 | cell adhesion molecule 4 |
|  | SPINT1 | serine peptidase inhibitor, Kunitz type 1 |
|  | KLK1 | kallikrein 1 |
|  | ACTN4 | actinin alpha 4 |
|  | CACTIN | cactin, spliceosome C complex subunit |
|  | ATP10A | ATPase phospholipid transporting 10A (putative) |
|  | GAS8 | growth arrest specific 8 |
|  | TOLLIP | toll interacting protein |
|  | PSKH1 | protein serine kinase H1 |
|  | NAT9 | N-acetyltransferase 9 (putative) |
|  | DMPK | DM1 protein kinase |
|  | STK16 | serine/threonine kinase 16 |
|  | HUWE1 | HECT, UBA and WWE domain containing E3 ubiquitin protein ligase 1 |
|  | INF2 | inverted formin 2 |
|  | RNF126 | ring finger protein 126 |
|  | PAK4 | p21 (RAC1) activated kinase 4 |
|  | FXR2 | FMR1 autosomal homolog 2 |
|  | FUZ | fuzzy planar cell polarity protein |
|  | KANSL3 | KAT8 regulatory NSL complex subunit 3 |
|  | DTX4 | deltex E3 ubiquitin ligase 4 |
|  | KRT7 | keratin 7 |
|  | PEX19 | peroxisomal biogenesis factor 19 |
|  | PC | pyruvate carboxylase |
|  | POU3F1 | POU class 3 homeobox 1 |
|  | TRPV4 | transient receptor potential cation channel subfamily V member 4 |
|  | GLB1L | galactosidase beta 1 like |
|  | PLXNB1 | plexin B1 |
|  | TMEM161A | transmembrane protein 161A |
|  | FAM162A | family with sequence similarity 162 member A |
|  | MYO5C | myosin VC |
|  | HOXC8 | homeobox C8 |
|  | INPPL1 | inositol polyphosphate phosphatase like 1 |
|  | TNS2 | tensin 2 |
|  | ANK1 | ankyrin 1 |
|  | ATXN2 | ataxin 2 |
|  | HOXD1 | homeobox D1 |
|  | VPS13D | vacuolar protein sorting 13 homolog D |
|  | FOCAD | focadhesin |
|  | OPLAH | 5-oxoprolinase, ATP-hydrolysing |
|  | HNF1A | HNF1 homeobox A |
|  | JMJD4 | jumonji domain containing 4 |
|  | REEP2 | receptor accessory protein 2 |
|  | TAOK2 | TAO kinase 2 |
|  | ZMYND11 | zinc finger MYND-type containing 11 |
|  | NELL1 | neural EGFL like 1 |
|  | PPP2R2B | protein phosphatase 2 regulatory subunit Bbeta |
|  | HSPB2 | heat shock protein family B (small) member 2 |
|  | RUSC2 | RUN and SH3 domain containing 2 |
|  | LGI2 | leucine rich repeat LGI family member 2 |
|  | CABP1 | calcium binding protein 1 |
|  | TEAD3 | TEA domain transcription factor 3 |
|  | COBL | cordon-bleu WH2 repeat protein |
|  | SPTB | spectrin beta, erythrocytic |
|  | TRIP10 | thyroid hormone receptor interactor 10 |
|  | GRM4 | glutamate metabotropic receptor 4 |
|  | TMPRSS6 | transmembrane serine protease 6 |
|  | HMG20B | high mobility group 20B |
|  | BRS3 | bombesin receptor subtype 3 |
|  | SLC25A4 | solute carrier family 25 member 4 |
|  | MYL4 | myosin light chain 4 |
|  | PLXNB2 | plexin B2 |
|  | ERBB3 | erb-b2 receptor tyrosine kinase 3 |
|  | BMP1 | bone morphogenetic protein 1 |
|  | STUB1 | STIP1 homology and U-box containing protein 1 |
|  | BMP2 | bone morphogenetic protein 2 |
|  | CUEDC1 | CUE domain containing 1 |
|  | CLPTM1 | CLPTM1 regulator of GABA type A receptor forward trafficking |
|  | WFS1 | wolframin ER transmembrane glycoprotein |
|  | TEX261 | testis expressed 261 |
|  | AGXT | alanine--glyoxylate and serine--pyruvate aminotransferase |
|  | GDI1 | GDP dissociation inhibitor 1 |
|  | ICMT | isoprenylcysteine carboxyl methyltransferase |
|  | SEMA7A | semaphorin 7A (John Milton Hagen blood group) |
|  | CRAT | carnitine O-acetyltransferase |
|  | PKD1 | polycystin 1, transient receptor potential channel interacting |
|  | GOLGB1 | golgin B1 |
|  | GTF3C5 | general transcription factor IIIC subunit 5 |
|  | ATP8A2 | ATPase phospholipid transporting 8A2 |
|  | MZF1 | myeloid zinc finger 1 |
|  | ROBO4 | roundabout guidance receptor 4 |
|  | MOK | MOK protein kinase |
|  | NOVA2 | NOVA alternative splicing regulator 2 |
|  | SMARCD3 | SWI/SNF related, matrix associated, actin dependent regulator of chromatin, subfamily d, member 3 |
|  | CEND1 | cell cycle exit and neuronal differentiation 1 |
|  | ZNF747 | zinc finger protein 747 |
|  | RBM10 | RNA binding motif protein 10 |
|  | TBCEL | tubulin folding cofactor E like |
|  | SLC48A1 | solute carrier family 48 member 1 |
|  | DRG2 | developmentally regulated GTP binding protein 2 |
|  | ACACA | acetyl-CoA carboxylase alpha |
|  | KIF3B | kinesin family member 3B |
|  | PACSIN3 | protein kinase C and casein kinase substrate in neurons 3 |
|  | RAD23A | RAD23 homolog A, nucleotide excision repair protein |
|  | FARP1 | FERM, ARH/RhoGEF and pleckstrin domain protein 1 |
|  | CD151 | CD151 molecule (Raph blood group) |
|  | VEGFA | vascular endothelial growth factor A |
|  | ROGDI | rogdi atypical leucine zipper |
|  | ITIH3 | inter-alpha-trypsin inhibitor heavy chain 3 |
|  | TGDS | TDP-glucose 4,6-dehydratase |
|  | CLEC16A | C-type lectin domain containing 16A |
|  | TRMT2A | tRNA methyltransferase 2 homolog A |
|  | SLC29A1 | solute carrier family 29 member 1 (Augustine blood group) |
|  | CDH16 | cadherin 16 |
|  | AKAP3 | A-kinase anchoring protein 3 |
|  | KDM5D | lysine demethylase 5D |
|  | NTHL1 | nth like DNA glycosylase 1 |
|  | LFNG | LFNG O-fucosylpeptide 3-beta-N-acetylglucosaminyltransferase |
|  | SPHK2 | sphingosine kinase 2 |
|  | PYCR3 | pyrroline-5-carboxylate reductase 3 |
|  | HYOU1 | hypoxia up-regulated 1 |
|  | NLGN4Y | neuroligin 4 Y-linked |
|  | RNF123 | ring finger protein 123 |
|  | ARHGEF17 | Rho guanine nucleotide exchange factor 17 |
|  | TMEM63A | transmembrane protein 63A |
|  | GPR153 | G protein-coupled receptor 153 |
|  | HSPB7 | heat shock protein family B (small) member 7 |
|  | MAPK8IP3 | mitogen-activated protein kinase 8 interacting protein 3 |
|  | ARHGEF5 | Rho guanine nucleotide exchange factor 5 |
|  | CREB3 | cAMP responsive element binding protein 3 |
|  | TMCO3 | transmembrane and coiled-coil domains 3 |
|  | ARHGAP28 | Rho GTPase activating protein 28 |
|  | NOL3 | nucleolar protein 3 |
|  | NDUFA3 | NADH:ubiquinone oxidoreductase subunit A3 |
|  | CTDP1 | CTD phosphatase subunit 1 |
|  | GPT | glutamic--pyruvic transaminase |
|  | NCKIPSD | NCK interacting protein with SH3 domain |
|  | CDK10 | cyclin dependent kinase 10 |
|  | TXN2 | thioredoxin 2 |
|  | BCS1L | BCS1 homolog, ubiquinol-cytochrome c reductase complex chaperone |
|  | SPEF1 | sperm flagellar 1 |
|  | TACC2 | transforming acidic coiled-coil containing protein 2 |
|  | OPRL1 | opioid related nociceptin receptor 1 |
|  | RUSF1 | RUS family member 1 |
|  | NR2E3 | nuclear receptor subfamily 2 group E member 3 |
|  | RAB11FIP3 | RAB11 family interacting protein 3 |
|  | HADHA | hydroxyacyl-CoA dehydrogenase trifunctional multienzyme complex subunit alpha |
|  | SNCG | synuclein gamma |
|  | RBFOX1 | RNA binding fox-1 homolog 1 |
|  | SIX5 | SIX homeobox 5 |
|  | UROS | uroporphyrinogen III synthase |
|  | SNHG32 | small nucleolar RNA host gene 32 |
|  | EFNB1 | ephrin B1 |
|  | SARS2 | seryl-tRNA synthetase 2, mitochondrial |
|  | PCYT2 | phosphate cytidylyltransferase 2, ethanolamine |
|  | PIGQ | phosphatidylinositol glycan anchor biosynthesis class Q |
|  | HBB | hemoglobin subunit beta |
|  | MAGI2 | membrane associated guanylate kinase, WW and PDZ domain containing 2 |
|  | ADORA1 | adenosine A1 receptor |
|  | CYP26B1 | cytochrome P450 family 26 subfamily B member 1 |
|  | SAMD4B | sterile alpha motif domain containing 4B |
|  | SHB | SH2 domain containing adaptor protein B |
|  | EPHX2 | epoxide hydrolase 2 |
|  | FAH | fumarylacetoacetate hydrolase |
|  | AMHR2 | anti-Mullerian hormone receptor type 2 |
|  | TBL3 | transducin beta like 3 |
|  | FBXL18 | F-box and leucine rich repeat protein 18 |
|  | SLC5A5 | solute carrier family 5 member 5 |
|  | RHOD | ras homolog family member D |
|  | DCUN1D2 | defective in cullin neddylation 1 domain containing 2 |
|  | PMM1 | phosphomannomutase 1 |
|  | ABHD4 | abhydrolase domain containing 4, N-acyl phospholipase B |
|  | TRIM10 | tripartite motif containing 10 |
|  | HAPLN2 | hyaluronan and proteoglycan link protein 2 |
|  | PLEKHG3 | pleckstrin homology and RhoGEF domain containing G3 |
|  | ARFIP2 | ADP ribosylation factor interacting protein 2 |
|  | SIK3 | SIK family kinase 3 |
|  | LZTS3 | leucine zipper tumor suppressor family member 3 |
|  | CSDC2 | cold shock domain containing C2 |
|  | GPD1 | glycerol-3-phosphate dehydrogenase 1 |
|  | NDUFS8 | NADH:ubiquinone oxidoreductase core subunit S8 |
|  | NLRX1 | NLR family member X1 |
|  | MLF2 | myeloid leukemia factor 2 |
|  | FUT6 | fucosyltransferase 6 |
|  | MYLK3 | myosin light chain kinase 3 |
|  | CSTPP1 | centriolar satellite-associated tubulin polyglutamylase complex regulator 1 |
|  | POMT2 | protein O-mannosyltransferase 2 |
|  | HSPB3 | heat shock protein family B (small) member 3 |
|  | PHOX2A | paired like homeobox 2A |
|  | CPZ | carboxypeptidase Z |
|  | USP46 | ubiquitin specific peptidase 46 |
|  | IFT140 | intraflagellar transport 140 |
|  | GNL1 | G protein nucleolar 1 (putative) |
|  | MST1 | macrophage stimulating 1 |
|  | PVR | PVR cell adhesion molecule |
|  | EEF1E1 | eukaryotic translation elongation factor 1 epsilon 1 |
|  | AQP5 | aquaporin 5 |
|  | PITPNA | phosphatidylinositol transfer protein alpha |
|  | PPP1R37 | protein phosphatase 1 regulatory subunit 37 |
|  | RPS6KA6 | ribosomal protein S6 kinase A6 |
|  | BCAM | basal cell adhesion molecule (Lutheran blood group) |
|  | PHACTR4 | phosphatase and actin regulator 4 |
|  | ACADS | acyl-CoA dehydrogenase short chain |
|  | CCDC40 | coiled-coil domain containing 40 |
|  | LZTR1 | leucine zipper like transcription regulator 1 |
|  | PGAP4 | post-GPI attachment to proteins GalNAc transferase 4 |
|  | SLC16A5 | solute carrier family 16 member 5 |
|  | GOLGA2P5 | GOLGA2 pseudogene 5 |
|  | POLA2 | DNA polymerase alpha 2, accessory subunit |
|  | ABCB9 | ATP binding cassette subfamily B member 9 |
|  | FNDC4 | fibronectin type III domain containing 4 |
|  | RPS6KA4 | ribosomal protein S6 kinase A4 |
|  | ABR | ABR activator of RhoGEF and GTPase |
|  | INO80D | INO80 complex subunit D |
|  | EPS8L2 | EPS8 like 2 |
|  | CDKN1C | cyclin dependent kinase inhibitor 1C |
|  | NENF | neudesin neurotrophic factor |
|  | PGM1 | phosphoglucomutase 1 |
|  | HOXA6 | homeobox A6 |
|  | EIF3L | eukaryotic translation initiation factor 3 subunit L |
|  | GPR27 | G protein-coupled receptor 27 |
|  | UTF1 | undifferentiated embryonic cell transcription factor 1 |
|  | CCDC106 | coiled-coil domain containing 106 |
|  | RALGPS1 | Ral GEF with PH domain and SH3 binding motif 1 |
|  | WDR13 | WD repeat domain 13 |
|  | PPFIA3 | PTPRF interacting protein alpha 3 |
|  | CNPPD1 | cyclin Pas1/PHO80 domain containing 1 |
|  | NCAN | neurocan |
|  | PYY2 | peptide YY 2 (pseudogene) |
|  | TULP3 | TUB like protein 3 |
|  | ELMO3 | engulfment and cell motility 3 |
|  | CENPX | centromere protein X |
|  | PEX5 | peroxisomal biogenesis factor 5 |
|  | PDZK1IP1 | PDZK1 interacting protein 1 |
|  | DHRS12 | dehydrogenase/reductase 12 |
|  | SPECC1L | sperm antigen with calponin homology and coiled-coil domains 1 like |
|  | TECTA | tectorin alpha |
|  | NRSN2 | neurensin 2 |
|  | TESK1 | testis associated actin remodelling kinase 1 |
|  | AURKAIP1 | aurora kinase A interacting protein 1 |
|  | SENP3 | SUMO specific peptidase 3 |
|  | SIRT3 | sirtuin 3 |
|  | BMP4 | bone morphogenetic protein 4 |
|  | ZNF576 | zinc finger protein 576 |
|  | MAP3K12 | mitogen-activated protein kinase kinase kinase 12 |
|  | FADS3 | fatty acid desaturase 3 |
|  | DMTN | dematin actin binding protein |
|  | SCNN1A | sodium channel epithelial 1 subunit alpha |
|  | DNAH9 | dynein axonemal heavy chain 9 |
|  | ADCK2 | aarF domain containing kinase 2 |
|  | SLC6A4 | solute carrier family 6 member 4 |
|  | TPGS2 | tubulin polyglutamylase complex subunit 2 |
|  | MUL1 | mitochondrial E3 ubiquitin protein ligase 1 |
|  | BFSP1 | beaded filament structural protein 1 |
|  | PLEKHB1 | pleckstrin homology domain containing B1 |
|  | KAT5 | lysine acetyltransferase 5 |
|  | ADGRA3 | adhesion G protein-coupled receptor A3 |
|  | CUL7 | cullin 7 |
|  | SLC22A17 | solute carrier family 22 member 17 |
|  | CDHR2 | cadherin related family member 2 |
|  | B3GALT4 | beta-1,3-galactosyltransferase 4 |
|  | REM1 | RRAD and GEM like GTPase 1 |
|  | HAAO | 3-hydroxyanthranilate 3,4-dioxygenase |
|  | CNNM2 | cyclin and CBS domain divalent metal cation transport mediator 2 |
|  | MGMT | O-6-methylguanine-DNA methyltransferase |
|  | RHOBTB2 | Rho related BTB domain containing 2 |
|  | PHF1 | PHD finger protein 1 |
|  | THEM6 | thioesterase superfamily member 6 |
|  | FCRL2 | Fc receptor like 2 |
|  | BCL2L10 | BCL2 like 10 |
|  | LUZP1 | leucine zipper protein 1 |
|  | PGAM2 | phosphoglycerate mutase 2 |
|  | ZNF771 | zinc finger protein 771 |
|  | RARA | retinoic acid receptor alpha |
|  | ZNF629 | zinc finger protein 629 |
|  | DNAJB12 | DnaJ heat shock protein family (Hsp40) member B12 |
|  | TMEM120B | transmembrane protein 120B |
|  | LMOD1 | leiomodin 1 |
|  | SH3GL1 | SH3 domain containing GRB2 like 1, endophilin A2 |
|  | ADAM5 | ADAM metallopeptidase domain 5 (pseudogene) |
|  | RAB6B | RAB6B, member RAS oncogene family |
|  | BBLN | bublin coiled coil protein |
|  | FSTL1 | follistatin like 1 |
|  | WIZ | WIZ zinc finger |
|  | C1orf159 | chromosome 1 open reading frame 159 |
|  | ATG4B | autophagy related 4B cysteine peptidase |
|  | ZC3H7B | zinc finger CCCH-type containing 7B |
|  | ZNF253 | zinc finger protein 253 |
|  | TBC1D17 | TBC1 domain family member 17 |
|  | PROC | protein C, inactivator of coagulation factors Va and VIIIa |
|  | LARP6 | La ribonucleoprotein 6, translational regulator |
|  | PLEKHA4 | pleckstrin homology domain containing A4 |
|  | PLA2R1 | phospholipase A2 receptor 1 |
|  | KATNB1 | katanin regulatory subunit B1 |
|  | RTEL1 | regulator of telomere elongation helicase 1 |
|  | STN1 | STN1 subunit of CST complex |
|  | PICALM | phosphatidylinositol binding clathrin assembly protein |
|  | HDAC5 | histone deacetylase 5 |
|  | POU6F1 | POU class 6 homeobox 1 |
|  | CABP2 | calcium binding protein 2 |
|  | ETV2 | ETS variant transcription factor 2 |
|  | ASIC4 | acid sensing ion channel subunit family member 4 |
|  | ASB13 | ankyrin repeat and SOCS box containing 13 |
|  | CLASRP | CLK4 associating serine/arginine rich protein |
|  | IVD | isovaleryl-CoA dehydrogenase |
|  | EHMT2 | euchromatic histone lysine methyltransferase 2 |
|  | ITFG2 | integrin alpha FG-GAP repeat containing 2 |
|  | GTPBP6 | GTP binding protein 6 (putative) |
|  | EIF5A2 | eukaryotic translation initiation factor 5A2 |
|  | MEG3 | maternally expressed 3 |
|  | GPR135 | G protein-coupled receptor 135 |
|  | TYRO3 | TYRO3 protein tyrosine kinase |
|  | GFER | growth factor, augmenter of liver regeneration |
|  | CSDE1 | cold shock domain containing E1 |
|  | BMP3 | bone morphogenetic protein 3 |
|  | DTX2P1-UPK3BP1-PMS2P11 | DTX2P1-UPK3BP1-PMS2P11 readthrough, transcribed pseudogene |
|  | URI1 | URI1 prefoldin like chaperone |
|  | ATP1A1 | ATPase Na+/K+ transporting subunit alpha 1 |
|  | RIPK4 | receptor interacting serine/threonine kinase 4 |
|  | TTLL5 | tubulin tyrosine ligase like 5 |
|  | RAB40C | RAB40C, member RAS oncogene family |
|  | FAM172A | family with sequence similarity 172 member A |
|  | CYP2A6 | cytochrome P450 family 2 subfamily A member 6 |
|  | WNT8B | Wnt family member 8B |
|  | FAM214B | family with sequence similarity 214 member B |
|  | MINK1 | misshapen like kinase 1 |
|  | PYY | peptide YY |
|  | DCTN2 | dynactin subunit 2 |
|  | TMEM8B | transmembrane protein 8B |
|  | KRI1 | KRI1 homolog |
|  | MRPL2 | mitochondrial ribosomal protein L2 |
|  | ZNF343 | zinc finger protein 343 |
|  | HOXA7 | homeobox A7 |
|  | ZCWPW1 | zinc finger CW-type and PWWP domain containing 1 |
|  | TUBG2 | tubulin gamma 2 |
|  | EMD | emerin |
|  | STRA6 | signaling receptor and transporter of retinol STRA6 |
|  | ARHGAP35 | Rho GTPase activating protein 35 |
|  | SFSWAP | splicing factor SWAP |
|  | PCDHB12 | protocadherin beta 12 |
|  | ARMH3 | armadillo like helical domain containing 3 |
|  | SRPK3 | SRSF protein kinase 3 |
|  | CPLANE2 | ciliogenesis and planar polarity effector complex subunit 2 |
|  | SLC25A1 | solute carrier family 25 member 1 |
|  | BGN | biglycan |
|  | MYH11 | myosin heavy chain 11 |
|  | PHKG2 | phosphorylase kinase catalytic subunit gamma 2 |
|  | NOP53 | NOP53 ribosome biogenesis factor |
|  | HDAC11 | histone deacetylase 11 |
|  | GRB7 | growth factor receptor bound protein 7 |
|  | TRAM2 | translocation associated membrane protein 2 |
|  | BMERB1 | bMERB domain containing 1 |
|  | CACNA1S | calcium voltage-gated channel subunit alpha1 S |
|  | FOXD2 | forkhead box D2 |
|  | FBXL15 | F-box and leucine rich repeat protein 15 |
|  | SCAP | SREBF chaperone |
|  | FOXC2 | forkhead box C2 |
|  | APEH | acylaminoacyl-peptide hydrolase |
|  | PCBP2 | poly(rC) binding protein 2 |
|  | TST | thiosulfate sulfurtransferase |
|  | OR1D2 | olfactory receptor family 1 subfamily D member 2 |
|  | NBAS | NBAS subunit of NRZ tethering complex |
|  | NXN | nucleoredoxin |
|  | SLC44A4 | solute carrier family 44 member 4 |
|  | RBM42 | RNA binding motif protein 42 |
|  | POMT1 | protein O-mannosyltransferase 1 |
|  | PIP4K2B | phosphatidylinositol-5-phosphate 4-kinase type 2 beta |
|  | TUSC2 | tumor suppressor 2, mitochondrial calcium regulator |
|  | TRAP1 | TNF receptor associated protein 1 |
|  | GALNT8 | polypeptide N-acetylgalactosaminyltransferase 8 |
|  | ZP2 | zona pellucida glycoprotein 2 |
|  | SRGAP2 | SLIT-ROBO Rho GTPase activating protein 2 |
|  | SLC25A22 | solute carrier family 25 member 22 |
|  | ASXL3 | ASXL transcriptional regulator 3 |
|  | TCF15 | transcription factor 15 |
|  | MLXIPL | MLX interacting protein like |
|  | ZNF335 | zinc finger protein 335 |
|  | ITGA2B | integrin subunit alpha 2b |
|  | IMMT | inner membrane mitochondrial protein |
|  | MLEC | malectin |
|  | FXR1 | FMR1 autosomal homolog 1 |
|  | AHCYL1 | adenosylhomocysteinase like 1 |
|  | TXNRD2 | thioredoxin reductase 2 |
|  | STAC | SH3 and cysteine rich domain |
|  | IRF2BP1 | interferon regulatory factor 2 binding protein 1 |
|  | KIF25 | kinesin family member 25 |
|  | MOGS | mannosyl-oligosaccharide glucosidase |
|  | DUSP9 | dual specificity phosphatase 9 |
|  | JPH2 | junctophilin 2 |
|  | CTTN | cortactin |
|  | CAMK2A | calcium/calmodulin dependent protein kinase II alpha |
|  | GYS1 | glycogen synthase 1 |
|  | SALL1 | spalt like transcription factor 1 |
|  | LRRC23 | leucine rich repeat containing 23 |
|  | IP6K1 | inositol hexakisphosphate kinase 1 |
|  | DNAJB5 | DnaJ heat shock protein family (Hsp40) member B5 |
|  | MMP24OS | MMP24 opposite strand |
|  | SLC5A2 | solute carrier family 5 member 2 |
|  | SYNJ2 | synaptojanin 2 |
|  | POLD4 | DNA polymerase delta 4, accessory subunit |
|  | PCNX2 | pecanex 2 |
|  | NCAPH2 | non-SMC condensin II complex subunit H2 |
| IgAN up-regulated DEGs |LN up-regulated DEGs | TRPV2 | transient receptor potential cation channel subfamily V member 2 |
|  | LAPTM5 | lysosomal protein transmembrane 5 |
|  | FXYD5 | FXYD domain containing ion transport regulator 5 |
|  | ITPKB | inositol-trisphosphate 3-kinase B |
| IgAN up-regulated DEGs |LN down-regulated DEGs | DCT | dopachrome tautomerase |
|  | TYR | tyrosinase |
|  | HBE1 | hemoglobin subunit epsilon 1 |
|  | AHSG | alpha 2-HS glycoprotein |
|  | RHAG | Rh associated glycoprotein |
|  | SOX2 | SRY-box transcription factor 2 |
|  | TFF1 | trefoil factor 1 |
|  | NOC2L | NOC2 like nucleolar associated transcriptional repressor |
|  | USP5 | ubiquitin specific peptidase 5 |
|  | HNRNPL | heterogeneous nuclear ribonucleoprotein L |
|  | GINS4 | GINS complex subunit 4 |
|  | SEC61A1 | SEC61 translocon subunit alpha 1 |
|  | INTS3 | integrator complex subunit 3 |
|  | BBC3 | BCL2 binding component 3 |
|  | CHAF1A | chromatin assembly factor 1 subunit A |
|  | AP2M1 | adaptor related protein complex 2 subunit mu 1 |
|  | RTL8C | retrotransposon Gag like 8C |
|  | PRKCSH | protein kinase C substrate 80K-H |
|  | NOTCH1 | notch receptor 1 |
|  | A4GALT | alpha 1,4-galactosyltransferase (P blood group) |
|  | RANGAP1 | Ran GTPase activating protein 1 |
|  | DEAF1 | DEAF1 transcription factor |
|  | RPS20 | ribosomal protein S20 |
|  | CRIP2 | cysteine rich protein 2 |
|  | URM1 | ubiquitin related modifier 1 |
|  | KLHDC3 | kelch domain containing 3 |
|  | RNF167 | ring finger protein 167 |
|  | LRP3 | LDL receptor related protein 3 |
|  | EML3 | EMAP like 3 |
|  | COPS7B | COP9 signalosome subunit 7B |
|  | PPP2R1A | protein phosphatase 2 scaffold subunit Aalpha |
|  | LMAN1 | lectin, mannose binding 1 |
|  | MGAT3 | beta-1,4-mannosyl-glycoprotein 4-beta-N-acetylglucosaminyltransferase |
|  | ARHGEF1 | Rho guanine nucleotide exchange factor 1 |
|  | EIF5A | eukaryotic translation initiation factor 5A |
|  | BCAT2 | branched chain amino acid transaminase 2 |
|  | STK11 | serine/threonine kinase 11 |
|  | ZFPL1 | zinc finger protein like 1 |
|  | SNRPA | small nuclear ribonucleoprotein polypeptide A |
|  | TLE5 | TLE family member 5, transcriptional modulator |
|  | SH3GLB2 | SH3 domain containing GRB2 like, endophilin B2 |
|  | UBTF | upstream binding transcription factor |
|  | NT5C | 5', 3'-nucleotidase, cytosolic |
|  | FGFR4 | fibroblast growth factor receptor 4 |
|  | RAB6A | RAB6A, member RAS oncogene family |
|  | NR1H2 | nuclear receptor subfamily 1 group H member 2 |
|  | SSTR3 | somatostatin receptor 3 |
|  | GPS1 | G protein pathway suppressor 1 |
|  | EFNA3 | ephrin A3 |
|  | PRKAR2A | protein kinase cAMP-dependent type II regulatory subunit alpha |
|  | ELAVL3 | ELAV like RNA binding protein 3 |
|  | HDAC7 | histone deacetylase 7 |
|  | H2AX | H2A.X variant histone |
|  | WDR62 | WD repeat domain 62 |
|  | CACNG1 | calcium voltage-gated channel auxiliary subunit gamma 1 |
|  | CHMP6 | charged multivesicular body protein 6 |
|  | PITPNM1 | phosphatidylinositol transfer protein membrane associated 1 |
|  | PIWIL2 | piwi like RNA-mediated gene silencing 2 |
|  | POLR2E | RNA polymerase II, I and III subunit E |
|  | ADM2 | adrenomedullin 2 |
|  | APOA1 | apolipoprotein A1 |
|  | HP1BP3 | heterochromatin protein 1 binding protein 3 |
|  | HIP1R | huntingtin interacting protein 1 related |
|  | MAPK3 | mitogen-activated protein kinase 3 |
|  | PRMT8 | protein arginine methyltransferase 8 |
|  | FURIN | furin, paired basic amino acid cleaving enzyme |
|  | AGPAT2 | 1-acylglycerol-3-phosphate O-acyltransferase 2 |
|  | MYOG | myogenin |
|  | AP1S1 | adaptor related protein complex 1 subunit sigma 1 |
|  | FKBP8 | FKBP prolyl isomerase 8 |
|  | PTMS | parathymosin |
|  | GLYR1 | glyoxylate reductase 1 homolog |
|  | MYL9 | myosin light chain 9 |
|  | TRIOBP | TRIO and F-actin binding protein |
|  | RARG | retinoic acid receptor gamma |
|  | AVPR2 | arginine vasopressin receptor 2 |
|  | PNPLA2 | patatin like phospholipase domain containing 2 |
|  | PRB3 | proline rich protein BstNI subfamily 3 |
|  | SLC12A9 | solute carrier family 12 member 9 |
|  | PPP6R2 | protein phosphatase 6 regulatory subunit 2 |
|  | ZNF358 | zinc finger protein 358 |
|  | VIPR1 | vasoactive intestinal peptide receptor 1 |
|  | PRAF2 | PRA1 domain family member 2 |
|  | YWHAE | tyrosine 3-monooxygenase/tryptophan 5-monooxygenase activation protein epsilon |
|  | SLC12A4 | solute carrier family 12 member 4 |
|  | SIRT2 | sirtuin 2 |
|  | YIPF5 | Yip1 domain family member 5 |
|  | ADAM15 | ADAM metallopeptidase domain 15 |
|  | PTDSS2 | phosphatidylserine synthase 2 |
|  | PTGER1 | prostaglandin E receptor 1 |
|  | MPPED1 | metallophosphoesterase domain containing 1 |
|  | ZBTB7B | zinc finger and BTB domain containing 7B |
|  | ICAM5 | intercellular adhesion molecule 5 |
|  | DNAJC4 | DnaJ heat shock protein family (Hsp40) member C4 |
|  | RANBP1 | RAN binding protein 1 |
|  | MAP3K3 | mitogen-activated protein kinase kinase kinase 3 |
|  | GNG4 | G protein subunit gamma 4 |
|  | TNPO2 | transportin 2 |
|  | C2orf72 | chromosome 2 open reading frame 72 |
|  | OR3A3 | olfactory receptor family 3 subfamily A member 3 |
|  | TF | transferrin |
|  | PLK1 | polo like kinase 1 |
|  | PAX1 | paired box 1 |
|  | TRMU | tRNA mitochondrial 2-thiouridylase |
|  | CDK2 | cyclin dependent kinase 2 |
|  | VARS1 | valyl-tRNA synthetase 1 |
|  | CD70 | CD70 molecule |
|  | PRLH | prolactin releasing hormone |
|  | AVP | arginine vasopressin |
|  | RABL6 | RAB, member RAS oncogene family like 6 |
|  | PTCRA | pre T cell antigen receptor alpha |
|  | TCEA2 | transcription elongation factor A2 |
|  | ERI3 | ERI1 exoribonuclease family member 3 |
|  | CAPNS1 | calpain small subunit 1 |
|  | MRPS34 | mitochondrial ribosomal protein S34 |
|  | CELF3 | CUGBP Elav-like family member 3 |
|  | GDF2 | growth differentiation factor 2 |
|  | RFXAP | regulatory factor X associated protein |
|  | SRCAP | Snf2 related CREBBP activator protein |
|  | GRIK5 | glutamate ionotropic receptor kainate type subunit 5 |
|  | NMRK2 | nicotinamide riboside kinase 2 |
|  | IGFALS | insulin like growth factor binding protein acid labile subunit |
|  | DNAJC11 | DnaJ heat shock protein family (Hsp40) member C11 |
|  | RAX | retina and anterior neural fold homeobox |
|  | CABIN1 | calcineurin binding protein 1 |
|  | ARVCF | ARVCF delta catenin family member |
|  | ATG13 | autophagy related 13 |
|  | BRME1 | break repair meiotic recombinase recruitment factor 1 |
|  | MMP25 | matrix metallopeptidase 25 |
|  | CYP11B2 | cytochrome P450 family 11 subfamily B member 2 |
|  | NFKBIL1 | NFKB inhibitor like 1 |
|  | MNX1 | motor neuron and pancreas homeobox 1 |
|  | PRR14 | proline rich 14 |
|  | L2HGDH | L-2-hydroxyglutarate dehydrogenase |
|  | AQP6 | aquaporin 6 |
|  | SPDEF | SAM pointed domain containing ETS transcription factor |
|  | SDK2 | sidekick cell adhesion molecule 2 |
|  | MMP14 | matrix metallopeptidase 14 |
|  | DCTN1 | dynactin subunit 1 |
|  | GLTP | glycolipid transfer protein |
|  | ZNF787 | zinc finger protein 787 |
|  | DES | desmin |
|  | CDH15 | cadherin 15 |
|  | BRF1 | BRF1 RNA polymerase III transcription initiation factor subunit |
|  | NSUN5P1 | NSUN5 pseudogene 1 |
|  | LHB | luteinizing hormone subunit beta |
|  | FH | fumarate hydratase |
|  | FHIP2B | FHF complex subunit HOOK interacting protein 2B |
|  | FBRS | fibrosin |
|  | CPTP | ceramide-1-phosphate transfer protein |
|  | ADCY1 | adenylate cyclase 1 |
|  | SYT5 | synaptotagmin 5 |
|  | FLOT2 | flotillin 2 |
|  | TIMM22 | translocase of inner mitochondrial membrane 22 |
|  | NUP188 | nucleoporin 188 |
|  | C1QTNF1 | C1q and TNF related 1 |
|  | SHC3 | SHC adaptor protein 3 |
|  | CIZ1 | CDKN1A interacting zinc finger protein 1 |
|  | PGGHG | protein-glucosylgalactosylhydroxylysine glucosidase |
|  | TRAPPC2L | trafficking protein particle complex subunit 2L |
|  | NUMA1 | nuclear mitotic apparatus protein 1 |
|  | BORCS6 | BLOC-1 related complex subunit 6 |
|  | PFKL | phosphofructokinase, liver type |
|  | KCNH4 | potassium voltage-gated channel subfamily H member 4 |
|  | NOX5 | NADPH oxidase 5 |
|  | ASMTL | acetylserotonin O-methyltransferase like |
|  | ADAMTSL2 | ADAMTS like 2 |
|  | GLP1R | glucagon like peptide 1 receptor |
|  | SEMA6B | semaphorin 6B |
|  | NTN1 | netrin 1 |
|  | MCM7 | minichromosome maintenance complex component 7 |
|  | TCOF1 | treacle ribosome biogenesis factor 1 |
|  | ARFRP1 | ADP ribosylation factor related protein 1 |
|  | CA9 | carbonic anhydrase 9 |
|  | CRTC1 | CREB regulated transcription coactivator 1 |
|  | ZER1 | zyg-11 related cell cycle regulator |
|  | CIAO3 | cytosolic iron-sulfur assembly component 3 |
|  | GJA8 | gap junction protein alpha 8 |
|  | SMARCB1 | SWI/SNF related, matrix associated, actin dependent regulator of chromatin, subfamily b, member 1 |
|  | VPS51 | VPS51 subunit of GARP complex |
|  | BICDL1 | BICD family like cargo adaptor 1 |
|  | WNT11 | Wnt family member 11 |
|  | SH3BP1 | SH3 domain binding protein 1 |
|  | SGTA | small glutamine rich tetratricopeptide repeat co-chaperone alpha |
|  | APOBEC3C | apolipoprotein B mRNA editing enzyme catalytic subunit 3C |
|  | PDCD5 | programmed cell death 5 |
|  | PTGES2 | prostaglandin E synthase 2 |
|  | ACTL8 | actin like 8 |
|  | DNAAF8 | dynein axonemal assembly factor 8 |
|  | RANBP3 | RAN binding protein 3 |
|  | ERN2 | endoplasmic reticulum to nucleus signaling 2 |
|  | GNRH2 | gonadotropin releasing hormone 2 |
|  | WNT10B | Wnt family member 10B |
|  | EEF2 | eukaryotic translation elongation factor 2 |
|  | MAPK8IP2 | mitogen-activated protein kinase 8 interacting protein 2 |
|  | MOSPD3 | motile sperm domain containing 3 |
|  | WBP11 | WW domain binding protein 11 |
|  | ZNF671 | zinc finger protein 671 |
|  | TCAP | titin-cap |
|  | WNT7B | Wnt family member 7B |
|  | RNF187 | ring finger protein 187 |
|  | FUT7 | fucosyltransferase 7 |
|  | LLGL1 | LLGL scribble cell polarity complex component 1 |
|  | CLSTN3 | calsyntenin 3 |
|  | THAP4 | THAP domain containing 4 |
|  | TMEM259 | transmembrane protein 259 |
|  | TEX13A | testis expressed 13A |
|  | APOA4 | apolipoprotein A4 |
|  | HHLA1 | HERV-H LTR-associating 1 |
|  | TOP3A | DNA topoisomerase III alpha |
|  | PLCH2 | phospholipase C eta 2 |
|  | ADRM1 | ADRM1 26S proteasome ubiquitin receptor |
|  | MORN1 | MORN repeat containing 1 |
|  | PRKAR1B | protein kinase cAMP-dependent type I regulatory subunit beta |
|  | ZNF768 | zinc finger protein 768 |
|  | TSC2 | TSC complex subunit 2 |
|  | PCNT | pericentrin |
|  | ACAP1 | ArfGAP with coiled-coil, ankyrin repeat and PH domains 1 |
|  | FASTK | Fas activated serine/threonine kinase |
|  | TRAPPC14 | trafficking protein particle complex subunit 14 |
|  | KCTD2 | potassium channel tetramerization domain containing 2 |
|  | INTS11 | integrator complex subunit 11 |
|  | KRT81 | keratin 81 |
|  | PCDH1 | protocadherin 1 |
|  | SERPINF2 | serpin family F member 2 |
|  | EMILIN1 | elastin microfibril interfacer 1 |
|  | MATN4 | matrilin 4 |
|  | DCAKD | dephospho-CoA kinase domain containing |
|  | PRSS22 | serine protease 22 |
|  | PADI1 | peptidyl arginine deiminase 1 |
|  | RPS4Y1 | ribosomal protein S4 Y-linked 1 |
|  | NECTIN1 | nectin cell adhesion molecule 1 |
|  | HDLBP | high density lipoprotein binding protein |
|  | SLC18A3 | solute carrier family 18 member A3 |
|  | MIF | macrophage migration inhibitory factor |
|  | DLG4 | discs large MAGUK scaffold protein 4 |
|  | MLST8 | MTOR associated protein, LST8 homolog |
|  | SHARPIN | SHANK associated RH domain interactor |
|  | MVK | mevalonate kinase |
|  | BCAN | brevican |
|  | USP11 | ubiquitin specific peptidase 11 |
|  | NPAS1 | neuronal PAS domain protein 1 |
|  | CENPB | centromere protein B |
|  | ZNF205 | zinc finger protein 205 |
|  | PODXL2 | podocalyxin like 2 |
|  | ANKRD11 | ankyrin repeat domain containing 11 |
|  | MXD4 | MAX dimerization protein 4 |
|  | SH3BP4 | SH3 domain binding protein 4 |
|  | E2F2 | E2F transcription factor 2 |
|  | COPG1 | COPI coat complex subunit gamma 1 |
|  | PTPA | protein phosphatase 2 phosphatase activator |
|  | PLD2 | phospholipase D2 |
|  | KIF22 | kinesin family member 22 |
|  | PKP4 | plakophilin 4 |
|  | CHRNB2 | cholinergic receptor nicotinic beta 2 subunit |
|  | CYP4F12 | cytochrome P450 family 4 subfamily F member 12 |
|  | ONECUT2 | one cut homeobox 2 |
|  | CAPN1 | calpain 1 |
|  | TTLL12 | tubulin tyrosine ligase like 12 |
|  | AKAP1 | A-kinase anchoring protein 1 |
|  | EPN1 | epsin 1 |
|  | TRPV6 | transient receptor potential cation channel subfamily V member 6 |
|  | WDR18 | WD repeat domain 18 |
|  | VWA7 | von Willebrand factor A domain containing 7 |
|  | TCTN2 | tectonic family member 2 |
|  | HSF1 | heat shock transcription factor 1 |
|  | RSPH6A | radial spoke head 6 homolog A |
|  | RASSF7 | Ras association domain family member 7 |
|  | PNMA3 | PNMA family member 3 |
|  | PRRC2A | proline rich coiled-coil 2A |
|  | TUBGCP2 | tubulin gamma complex associated protein 2 |
|  | PRRX2 | paired related homeobox 2 |
|  | PDCD1 | programmed cell death 1 |
|  | G6PC3 | glucose-6-phosphatase catalytic subunit 3 |
|  | TMEM94 | transmembrane protein 94 |
|  | DOK4 | docking protein 4 |
|  | NDUFS5 | NADH:ubiquinone oxidoreductase subunit S5 |
|  | DSCAM | DS cell adhesion molecule |
|  | NPFFR1 | neuropeptide FF receptor 1 |
|  | PPP2R5D | protein phosphatase 2 regulatory subunit B'delta |
|  | KIAA1614 | KIAA1614 |
|  | TOM1L2 | target of myb1 like 2 membrane trafficking protein |
|  | COQ7 | coenzyme Q7, hydroxylase |
|  | GCK | glucokinase |
|  | RHOT2 | ras homolog family member T2 |
|  | SOX17 | SRY-box transcription factor 17 |
|  | CYP2A13 | cytochrome P450 family 2 subfamily A member 13 |
|  | COASY | Coenzyme A synthase |
|  | PLEC | plectin |
|  | PRKCZ | protein kinase C zeta |
|  | PSD | pleckstrin and Sec7 domain containing |
|  | ZNF219 | zinc finger protein 219 |
|  | ZNF506 | zinc finger protein 506 |
|  | MPST | mercaptopyruvate sulfurtransferase |
|  | PATZ1 | POZ/BTB and AT hook containing zinc finger 1 |
|  | FRMPD4 | FERM and PDZ domain containing 4 |
|  | TPSG1 | tryptase gamma 1 |
|  | DUSP26 | dual specificity phosphatase 26 |
|  | IZUMO4 | IZUMO family member 4 |
|  | THAP3 | THAP domain containing 3 |
|  | IQCC | IQ motif containing C |
|  | OGFR | opioid growth factor receptor |
|  | LIMS2 | LIM zinc finger domain containing 2 |
|  | ZNF428 | zinc finger protein 428 |
|  | NT5M | 5',3'-nucleotidase, mitochondrial |
|  | ERF | ETS2 repressor factor |
|  | ST3GAL4 | ST3 beta-galactoside alpha-2,3-sialyltransferase 4 |
|  | HCG9 | HLA complex group 9 |
|  | MRPL4 | mitochondrial ribosomal protein L4 |
|  | TONSL | tonsoku like, DNA repair protein |
|  | FOXH1 | forkhead box H1 |
|  | MBD3 | methyl-CpG binding domain protein 3 |
|  | ART1 | ADP-ribosyltransferase 1 |
|  | GNAT1 | G protein subunit alpha transducin 1 |
|  | HTR5A | 5-hydroxytryptamine receptor 5A |
|  | FABP6 | fatty acid binding protein 6 |
|  | GCAT | glycine C-acetyltransferase |
|  | B3GNT4 | UDP-GlcNAc:betaGal beta-1,3-N-acetylglucosaminyltransferase 4 |
|  | GDAP1L1 | ganglioside induced differentiation associated protein 1 like 1 |
|  | ACBD4 | acyl-CoA binding domain containing 4 |
|  | CARS2 | cysteinyl-tRNA synthetase 2, mitochondrial |
|  | TMEM59L | transmembrane protein 59 like |
|  | HTR4 | 5-hydroxytryptamine receptor 4 |
|  | FZR1 | fizzy and cell division cycle 20 related 1 |
|  | SLC38A3 | solute carrier family 38 member 3 |
|  | POLL | DNA polymerase lambda |
|  | CDC42BPB | CDC42 binding protein kinase beta |
|  | SIPA1L3 | signal induced proliferation associated 1 like 3 |
|  | NDST2 | N-deacetylase and N-sulfotransferase 2 |
|  | ELOB | elongin B |
|  | TRPV5 | transient receptor potential cation channel subfamily V member 5 |
|  | LMF2 | lipase maturation factor 2 |
|  | ANKEF1 | ankyrin repeat and EF-hand domain containing 1 |
|  | SRPRA | SRP receptor subunit alpha |
|  | TP73 | tumor protein p73 |
|  | TSPYL2 | TSPY like 2 |
|  | FBXO24 | F-box protein 24 |
|  | ALDH3B1 | aldehyde dehydrogenase 3 family member B1 |
|  | FLNA | filamin A |
|  | LSM3 | LSM3 homolog, U6 small nuclear RNA and mRNA degradation associated |
|  | KLK8 | kallikrein related peptidase 8 |
|  | HSF4 | heat shock transcription factor 4 |
|  | SPSB3 | splA/ryanodine receptor domain and SOCS box containing 3 |
|  | MUC6 | mucin 6, oligomeric mucus/gel-forming |
|  | ATXN2L | ataxin 2 like |
|  | BAD | BCL2 associated agonist of cell death |
|  | PLCD1 | phospholipase C delta 1 |
|  | MMP24 | matrix metallopeptidase 24 |
|  | HR | HR lysine demethylase and nuclear receptor corepressor |
|  | GPR162 | G protein-coupled receptor 162 |
|  | SETD1A | SET domain containing 1A, histone lysine methyltransferase |
|  | BCKDHA | branched chain keto acid dehydrogenase E1 subunit alpha |
|  | PRRG2 | proline rich and Gla domain 2 |
|  | ARHGEF2 | Rho/Rac guanine nucleotide exchange factor 2 |
|  | BDKRB1 | bradykinin receptor B1 |
|  | ABHD11 | abhydrolase domain containing 11 |
|  | SNAPC2 | small nuclear RNA activating complex polypeptide 2 |
|  | EFCAB6 | EF-hand calcium binding domain 6 |
|  | TOMM7 | translocase of outer mitochondrial membrane 7 |
|  | PCBP4 | poly(rC) binding protein 4 |
|  | PDLIM7 | PDZ and LIM domain 7 |
|  | THRAP3 | thyroid hormone receptor associated protein 3 |
|  | ARMC6 | armadillo repeat containing 6 |
|  | GNAZ | G protein subunit alpha z |
|  | DHTKD1 | dehydrogenase E1 and transketolase domain containing 1 |
|  | ARMC7 | armadillo repeat containing 7 |
|  | PIH1D1 | PIH1 domain containing 1 |
|  | NXF3 | nuclear RNA export factor 3 |
|  | HNRNPUL2 | heterogeneous nuclear ribonucleoprotein U like 2 |
|  | ZNF408 | zinc finger protein 408 |
|  | FGF17 | fibroblast growth factor 17 |
|  | CTF1 | cardiotrophin 1 |
|  | COX7A1 | cytochrome c oxidase subunit 7A1 |
|  | CITED1 | Cbp/p300 interacting transactivator with Glu/Asp rich carboxy-terminal domain 1 |
|  | ZNF446 | zinc finger protein 446 |
|  | HCFC1 | host cell factor C1 |
|  | SYDE1 | synapse defective Rho GTPase homolog 1 |
|  | ATP2C2 | ATPase secretory pathway Ca2+ transporting 2 |
|  | HOXB1 | homeobox B1 |
|  | DHX32 | DEAH-box helicase 32 (putative) |
|  | CAPN10 | calpain 10 |
|  | GCKR | glucokinase regulator |
|  | OSBP2 | oxysterol binding protein 2 |
|  | ABHD8 | abhydrolase domain containing 8 |
|  | RAB1B | RAB1B, member RAS oncogene family |
|  | MED16 | mediator complex subunit 16 |
|  | IQSEC2 | IQ motif and Sec7 domain ArfGEF 2 |
|  | PICK1 | protein interacting with PRKCA 1 |
|  | VPS52 | VPS52 subunit of GARP complex |
|  | KIAA0319L | KIAA0319 like |
|  | DDX3Y | DEAD-box helicase 3 Y-linked |
|  | CNGB1 | cyclic nucleotide gated channel subunit beta 1 |
| IgAN down-regulated DEGs|LN up-regulated DEGs | TMEM185B | transmembrane protein 185B |
|  | PAQR3 | progestin and adipoQ receptor family member 3 |
|  | HLA-A | major histocompatibility complex, class I, A |
|  | ATP6V0E1 | ATPase H+ transporting V0 subunit e1 |
|  | ATG4A | autophagy related 4A cysteine peptidase |
|  | SUCLA2 | succinate-CoA ligase ADP-forming subunit beta |
|  | MEAF6 | MYST/Esa1 associated factor 6 |
|  | GUCY1A1 | guanylate cyclase 1 soluble subunit alpha 1 |
|  | IFIT1 | interferon induced protein with tetratricopeptide repeats 1 |
|  | EFR3A | EFR3 homolog A |
|  | UBE2A | ubiquitin conjugating enzyme E2 A |
|  | HERC5 | HECT and RLD domain containing E3 ubiquitin protein ligase 5 |
|  | UBA3 | ubiquitin like modifier activating enzyme 3 |
|  | RNF125 | ring finger protein 125 |
|  | PDHX | pyruvate dehydrogenase complex component X |
|  | TEFM | transcription elongation factor, mitochondrial |
|  | TRIM21 | tripartite motif containing 21 |
|  | NDUFA5 | NADH:ubiquinone oxidoreductase subunit A5 |
|  | COG5 | component of oligomeric golgi complex 5 |
|  | ATF3 | activating transcription factor 3 |
|  | RIT1 | Ras like without CAAX 1 |
|  | IGFBP7 | insulin like growth factor binding protein 7 |
|  | NPC1 | NPC intracellular cholesterol transporter 1 |
|  | SPARC | secreted protein acidic and cysteine rich |
|  | COPS5 | COP9 signalosome subunit 5 |
|  | HERC6 | HECT and RLD domain containing E3 ubiquitin protein ligase family member 6 |
|  | TRIM38 | tripartite motif containing 38 |
|  | KLF10 | Kruppel like factor 10 |
|  | CHMP5 | charged multivesicular body protein 5 |
|  | YRDC | yrdC N6-threonylcarbamoyltransferase domain containing |
|  | CD81 | CD81 molecule |
|  | ARMCX1 | armadillo repeat containing X-linked 1 |
|  | EIF2AK2 | eukaryotic translation initiation factor 2 alpha kinase 2 |
|  | AP5M1 | adaptor related protein complex 5 subunit mu 1 |
|  | OAS1 | 2'-5'-oligoadenylate synthetase 1 |
|  | OAS2 | 2'-5'-oligoadenylate synthetase 2 |
|  | DDX47 | DEAD-box helicase 47 |
|  | PALMD | palmdelphin |
|  | RABIF | RAB interacting factor |
|  | GNL2 | G protein nucleolar 2 |
|  | TRMT12 | tRNA methyltransferase 12 homolog |
|  | IFIT2 | interferon induced protein with tetratricopeptide repeats 2 |
|  | MICU2 | mitochondrial calcium uptake 2 |
|  | VPS4B | vacuolar protein sorting 4 homolog B |
|  | STX18 | syntaxin 18 |
|  | EMC2 | ER membrane protein complex subunit 2 |
|  | IFNAR1 | interferon alpha and beta receptor subunit 1 |
|  | SH3BGRL | SH3 domain binding glutamate rich protein like |
|  | ARAP2 | ArfGAP with RhoGAP domain, ankyrin repeat and PH domain 2 |
|  | IFI44 | interferon induced protein 44 |
|  | MFF | mitochondrial fission factor |
|  | SLC25A13 | solute carrier family 25 member 13 |
|  | GMPR | guanosine monophosphate reductase |
|  | UNC50 | unc-50 inner nuclear membrane RNA binding protein |
|  | UBE2D2 | ubiquitin conjugating enzyme E2 D2 |
|  | VDAC3 | voltage dependent anion channel 3 |
|  | RTP4 | receptor transporter protein 4 |
|  | RPIA | ribose 5-phosphate isomerase A |
|  | NUP153 | nucleoporin 153 |
|  | NSL1 | NSL1 component of MIS12 kinetochore complex |
|  | PHF11 | PHD finger protein 11 |
|  | DHX29 | DExH-box helicase 29 |
|  | TMEM243 | transmembrane protein 243 |
|  | TMEM33 | transmembrane protein 33 |
|  | CDC73 | cell division cycle 73 |
|  | RNF7 | ring finger protein 7 |
|  | SLC35A1 | solute carrier family 35 member A1 |
|  | ING3 | inhibitor of growth family member 3 |
|  | SFT2D2 | SFT2 domain containing 2 |
|  | IFIH1 | interferon induced with helicase C domain 1 |
|  | MAP2K1 | mitogen-activated protein kinase kinase 1 |
|  | OSTM1 | osteoclastogenesis associated transmembrane protein 1 |
|  | ASNSD1 | asparagine synthetase domain containing 1 |
|  | SCPEP1 | serine carboxypeptidase 1 |
|  | SP100 | SP100 nuclear antigen |
|  | PCMT1 | protein-L-isoaspartate (D-aspartate) O-methyltransferase |
|  | SACS | sacsin molecular chaperone |
|  | LAMP2 | lysosomal associated membrane protein 2 |
|  | ASAH1 | N-acylsphingosine amidohydrolase 1 |
|  | PTGER2 | prostaglandin E receptor 2 |
|  | C12orf4 | chromosome 12 open reading frame 4 |
|  | MKNK1 | MAPK interacting serine/threonine kinase 1 |
|  | CEBPG | CCAAT enhancer binding protein gamma |
|  | SNX1 | sorting nexin 1 |
|  | IFI44L | interferon induced protein 44 like |
|  | EIF1AX | eukaryotic translation initiation factor 1A X-linked |
|  | MX1 | MX dynamin like GTPase 1 |
|  | PRPF18 | pre-mRNA processing factor 18 |
|  | CASP7 | caspase 7 |
|  | XAF1 | XIAP associated factor 1 |
|  | TJP2 | tight junction protein 2 |
|  | APOL6 | apolipoprotein L6 |
|  | GCA | grancalcin |
|  | C1GALT1C1 | C1GALT1 specific chaperone 1 |
|  | LARP4 | La ribonucleoprotein 4 |
|  | MKLN1 | muskelin 1 |
|  | TMEM62 | transmembrane protein 62 |
|  | CTSO | cathepsin O |
|  | UMPS | uridine monophosphate synthetase |
|  | GCLC | glutamate-cysteine ligase catalytic subunit |
|  | ASNS | asparagine synthetase (glutamine-hydrolyzing) |
|  | TIGAR | TP53 induced glycolysis regulatory phosphatase |
|  | PDCD10 | programmed cell death 10 |
|  | TAF2 | TATA-box binding protein associated factor 2 |
|  | TMEM50A | transmembrane protein 50A |
|  | IFIT5 | interferon induced protein with tetratricopeptide repeats 5 |
|  | KMT5B | lysine methyltransferase 5B |
|  | ATP6V0A2 | ATPase H+ transporting V0 subunit a2 |
|  | CDC37L1 | cell division cycle 37 like 1 |
|  | FAM114A2 | family with sequence similarity 114 member A2 |
|  | HNRNPA2B1 | heterogeneous nuclear ribonucleoprotein A2/B1 |
|  | UFM1 | ubiquitin fold modifier 1 |
|  | CTR9 | CTR9 homolog, Paf1/RNA polymerase II complex component |
|  | SPART | spartin |
|  | TRIM22 | tripartite motif containing 22 |
|  | SMNDC1 | survival motor neuron domain containing 1 |
|  | SELENOP | selenoprotein P |
|  | ZZZ3 | zinc finger ZZ-type containing 3 |
|  | ZMPSTE24 | zinc metallopeptidase STE24 |
|  | KIN | Kin17 DNA and RNA binding protein |
|  | ZBTB11 | zinc finger and BTB domain containing 11 |
|  | TLR3 | toll like receptor 3 |
|  | SRP54 | signal recognition particle 54 |
|  | UBFD1 | ubiquitin family domain containing 1 |
|  | DBF4 | DBF4 zinc finger |
|  | SHTN1 | shootin 1 |
|  | MARCHF5 | membrane associated ring-CH-type finger 5 |
|  | MX2 | MX dynamin like GTPase 2 |
|  | TAF7 | TATA-box binding protein associated factor 7 |
|  | MFSD1 | major facilitator superfamily domain containing 1 |
|  | SRRD | SRR1 domain containing |
|  | MDN1 | midasin AAA ATPase 1 |
|  | SEC24B | SEC24 homolog B, COPII coat complex component |
|  | TRIM14 | tripartite motif containing 14 |
|  | PLIN2 | perilipin 2 |
|  | RCBTB1 | RCC1 and BTB domain containing protein 1 |
|  | CTSK | cathepsin K |
|  | SYNCRIP | synaptotagmin binding cytoplasmic RNA interacting protein |
|  | PANK2 | pantothenate kinase 2 |
|  | FEZ2 | fasciculation and elongation protein zeta 2 |
|  | RIF1 | replication timing regulatory factor 1 |
|  | RSAD2 | radical S-adenosyl methionine domain containing 2 |
|  | MAGT1 | magnesium transporter 1 |
|  | ARL5A | ADP ribosylation factor like GTPase 5A |
|  | RRP15 | ribosomal RNA processing 15 homolog |
|  | HSD17B11 | hydroxysteroid 17-beta dehydrogenase 11 |
|  | DGLUCY | D-glutamate cyclase |
|  | IFI6 | interferon alpha inducible protein 6 |
|  | MRE11 | MRE11 homolog, double strand break repair nuclease |
|  | MRPL18 | mitochondrial ribosomal protein L18 |
|  | SART3 | spliceosome associated factor 3, U4/U6 recycling protein |
|  | PTBP2 | polypyrimidine tract binding protein 2 |
|  | DDX58 | DExD/H-box helicase 58 |
|  | PRCP | prolylcarboxypeptidase |
|  | TAF11 | TATA-box binding protein associated factor 11 |
|  | ZC3H15 | zinc finger CCCH-type containing 15 |
|  | GTPBP4 | GTP binding protein 4 |
|  | RBM5 | RNA binding motif protein 5 |
|  | RBM28 | RNA binding motif protein 28 |
|  | TRIB1 | tribbles pseudokinase 1 |
|  | SNX2 | sorting nexin 2 |
|  | IFIT3 | interferon induced protein with tetratricopeptide repeats 3 |
|  | YTHDF3 | YTH N6-methyladenosine RNA binding protein 3 |
|  | CORO1C | coronin 1C |
|  | GTF2E2 | general transcription factor IIE subunit 2 |
|  | B2M | beta-2-microglobulin |
|  | DENND4B | DENN domain containing 4B |
|  | MRPL15 | mitochondrial ribosomal protein L15 |
|  | CREG1 | cellular repressor of E1A stimulated genes 1 |
|  | RRN3 | RRN3 homolog, RNA polymerase I transcription factor |
|  | CLPX | caseinolytic mitochondrial matrix peptidase chaperone subunit X |
|  | ETNK1 | ethanolamine kinase 1 |
|  | NAA50 | N-alpha-acetyltransferase 50, NatE catalytic subunit |
|  | C9orf40 | chromosome 9 open reading frame 40 |
|  | TMEM123 | transmembrane protein 123 |
|  | RBM4B | RNA binding motif protein 4B |
|  | SAMD9 | sterile alpha motif domain containing 9 |
|  | SRBD1 | S1 RNA binding domain 1 |
|  | RBM7 | RNA binding motif protein 7 |
|  | AGA | aspartylglucosaminidase |
|  | FUT4 | fucosyltransferase 4 |
|  | CCND1 | cyclin D1 |
|  | OAS3 | 2'-5'-oligoadenylate synthetase 3 |
|  | DMXL2 | Dmx like 2 |
|  | PFDN2 | prefoldin subunit 2 |
|  | GBP1 | guanylate binding protein 1 |
|  | CDKN2AIP | CDKN2A interacting protein |
|  | CHUK | component of inhibitor of nuclear factor kappa B kinase complex |
|  | SAT1 | spermidine/spermine N1-acetyltransferase 1 |
|  | TM9SF3 | transmembrane 9 superfamily member 3 |
|  | ZCCHC8 | zinc finger CCHC-type containing 8 |
|  | TRIAP1 | TP53 regulated inhibitor of apoptosis 1 |
|  | STAT1 | signal transducer and activator of transcription 1 |
|  | RUBCN | rubicon autophagy regulator |
|  | ZNF143 | zinc finger protein 143 |
|  | MYD88 | MYD88 innate immune signal transduction adaptor |
|  | IQGAP1 | IQ motif containing GTPase activating protein 1 |
|  | NOC3L | NOC3 like DNA replication regulator |
|  | NRAS | NRAS proto-oncogene, GTPase |
|  | CHORDC1 | cysteine and histidine rich domain containing 1 |
|  | HAT1 | histone acetyltransferase 1 |
|  | TRIM5 | tripartite motif containing 5 |
|  | YLPM1 | YLP motif containing 1 |
|  | ISG20 | interferon stimulated exonuclease gene 20 |
|  | ARL6IP1 | ADP ribosylation factor like GTPase 6 interacting protein 1 |
|  | KCTD12 | potassium channel tetramerization domain containing 12 |
|  | LAP3 | leucine aminopeptidase 3 |
|  | UBE2D3 | ubiquitin conjugating enzyme E2 D3 |
|  | TNFAIP8 | TNF alpha induced protein 8 |
|  | RSF1 | remodeling and spacing factor 1 |
|  | OASL | 2'-5'-oligoadenylate synthetase like |
|  | CSGALNACT2 | chondroitin sulfate N-acetylgalactosaminyltransferase 2 |
|  | ZNF264 | zinc finger protein 264 |
|  | DUSP6 | dual specificity phosphatase 6 |
|  | IGF2R | insulin like growth factor 2 receptor |
|  | NSF | N-ethylmaleimide sensitive factor, vesicle fusing ATPase |
|  | ATP6V1B2 | ATPase H+ transporting V1 subunit B2 |
|  | NMI | N-myc and STAT interactor |
|  | DDX60 | DExD/H-box helicase 60 |
|  | LAGE3 | L antigen family member 3 |
|  | AZI2 | 5-azacytidine induced 2 |
|  | METTL4 | methyltransferase 4, N6-adenosine |
|  | DPYD | dihydropyrimidine dehydrogenase |
|  | ISOC1 | isochorismatase domain containing 1 |
|  | POLR2D | RNA polymerase II subunit D |
|  | TBCC | tubulin folding cofactor C |
|  | RPAP3 | RNA polymerase II associated protein 3 |
|  | TRMT13 | tRNA methyltransferase 13 homolog |
|  | GLRX | glutaredoxin |
|  | RALA | RAS like proto-oncogene A |
|  | RYBP | RING1 and YY1 binding protein |
|  | DENND1B | DENN domain containing 1B |
|  | SIGLEC1 | sialic acid binding Ig like lectin 1 |
|  | NFYB | nuclear transcription factor Y subunit beta |
|  | PGK1 | phosphoglycerate kinase 1 |
|  | GALNT1 | polypeptide N-acetylgalactosaminyltransferase 1 |
|  | CD38 | CD38 molecule |
|  | EIF4E | eukaryotic translation initiation factor 4E |
|  | TSC22D1 | TSC22 domain family member 1 |
|  | SLA | Src like adaptor |
|  | TINF2 | TERF1 interacting nuclear factor 2 |
|  | RCBTB2 | RCC1 and BTB domain containing protein 2 |
|  | KDM6A | lysine demethylase 6A |
|  | UBE2L6 | ubiquitin conjugating enzyme E2 L6 |
|  | DYNLT1 | dynein light chain Tctex-type 1 |
|  | GCH1 | GTP cyclohydrolase 1 |
|  | TMF1 | TATA element modulatory factor 1 |
|  | CHSY1 | chondroitin sulfate synthase 1 |
|  | SDCBP | syndecan binding protein |
|  | PSMD10 | proteasome 26S subunit, non-ATPase 10 |
|  | SLC38A6 | solute carrier family 38 member 6 |
|  | TTF2 | transcription termination factor 2 |
|  | KMO | kynurenine 3-monooxygenase |
|  | SPG11 | SPG11 vesicle trafficking associated, spatacsin |
|  | C6orf62 | chromosome 6 open reading frame 62 |
|  | HAUS3 | HAUS augmin like complex subunit 3 |
|  | UBE2K | ubiquitin conjugating enzyme E2 K |
|  | ZFAND5 | zinc finger AN1-type containing 5 |
|  | ZCCHC10 | zinc finger CCHC-type containing 10 |
|  | SPATS2L | spermatogenesis associated serine rich 2 like |
|  | SOAT1 | sterol O-acyltransferase 1 |
|  | PARP12 | poly(ADP-ribose) polymerase family member 12 |
|  | PKN2 | protein kinase N2 |
|  | USP3 | ubiquitin specific peptidase 3 |
|  | LEPROTL1 | leptin receptor overlapping transcript like 1 |
|  | SP110 | SP110 nuclear body protein |
|  | MFN1 | mitofusin 1 |
|  | MICB | MHC class I polypeptide-related sequence B |
|  | HSP90AA1 | heat shock protein 90 alpha family class A member 1 |
|  | LTN1 | listerin E3 ubiquitin protein ligase 1 |
|  | ZCCHC2 | zinc finger CCHC-type containing 2 |
|  | PPP2R3C | protein phosphatase 2 regulatory subunit B''gamma |
|  | KRAS | KRAS proto-oncogene, GTPase |
|  | UPF2 | UPF2 regulator of nonsense mediated mRNA decay |
|  | ATF7IP | activating transcription factor 7 interacting protein |
|  | ST3GAL5 | ST3 beta-galactoside alpha-2,3-sialyltransferase 5 |
|  | ANKRD12 | ankyrin repeat domain 12 |
|  | TMEM140 | transmembrane protein 140 |
|  | LARS1 | leucyl-tRNA synthetase 1 |
|  | SAMHD1 | SAM and HD domain containing deoxynucleoside triphosphate triphosphohydrolase 1 |
|  | SLFN12 | schlafen family member 12 |
|  | PLSCR1 | phospholipid scramblase 1 |
|  | HEPH | hephaestin |
|  | TLR1 | toll like receptor 1 |
|  | WDR11 | WD repeat domain 11 |
|  | KHNYN | KH and NYN domain containing |
|  | XIST | X inactive specific transcript |
|  | FCGRT | Fc gamma receptor and transporter |
|  | GNPDA1 | glucosamine-6-phosphate deaminase 1 |
|  | CNTRL | centriolin |
|  | SUN1 | Sad1 and UNC84 domain containing 1 |
|  | FOXJ3 | forkhead box J3 |
|  | SLC31A1 | solute carrier family 31 member 1 |
|  | RBM12 | RNA binding motif protein 12 |
|  | RAP2C | RAP2C, member of RAS oncogene family |
|  | ADAR | adenosine deaminase RNA specific |
|  | ATP6AP2 | ATPase H+ transporting accessory protein 2 |
|  | SDHD | succinate dehydrogenase complex subunit D |
|  | FCF1 | FCF1 rRNA-processing protein |
|  | FAR2 | fatty acyl-CoA reductase 2 |
|  | MPV17 | mitochondrial inner membrane protein MPV17 |
|  | GIMAP4 | GTPase, IMAP family member 4 |
|  | PPIP5K2 | diphosphoinositol pentakisphosphate kinase 2 |
|  | CAB39 | calcium binding protein 39 |
|  | SMARCA5 | SWI/SNF related, matrix associated, actin dependent regulator of chromatin, subfamily a, member 5 |
|  | SMG8 | SMG8 nonsense mediated mRNA decay factor |
|  | TAF5 | TATA-box binding protein associated factor 5 |
|  | MTO1 | mitochondrial tRNA translation optimization 1 |
|  | ATP2B1 | ATPase plasma membrane Ca2+ transporting 1 |
|  | TDRD7 | tudor domain containing 7 |
|  | NSMAF | neutral sphingomyelinase activation associated factor |
|  | RAN | RAN, member RAS oncogene family |
|  | STK24 | serine/threonine kinase 24 |
|  | SHFL | shiftless antiviral inhibitor of ribosomal frameshifting |
|  | DHX58 | DExH-box helicase 58 |
|  | ACTR3 | actin related protein 3 |
|  | TFEC | transcription factor EC |
|  | RAB11FIP1 | RAB11 family interacting protein 1 |
|  | THG1L | tRNA-histidine guanylyltransferase 1 like |
|  | AIMP1 | aminoacyl tRNA synthetase complex interacting multifunctional protein 1 |
|  | GNS | glucosamine (N-acetyl)-6-sulfatase |
|  | CYRIA | CYFIP related Rac1 interactor A |
|  | SIAH2 | siah E3 ubiquitin protein ligase 2 |
|  | MORC3 | MORC family CW-type zinc finger 3 |
|  | HPSE | heparanase |
|  | SPG21 | SPG21 abhydrolase domain containing, maspardin |
|  | TBL2 | transducin beta like 2 |
|  | DDX18 | DEAD-box helicase 18 |
|  | ZNF200 | zinc finger protein 200 |
|  | CD164 | CD164 molecule |
|  | MERTK | MER proto-oncogene, tyrosine kinase |
|  | UTP18 | UTP18 small subunit processome component |
| IgAN down-regulated DEGs|LN down-regulated DEGs | INSL4 | insulin like 4 |
|  | BDNF | brain derived neurotrophic factor |
|  | KIAA0040 | KIAA0040 |
|  | TSPAN6 | tetraspanin 6 |
|  | IL36G | interleukin 36 gamma |
|  | RCAN1 | regulator of calcineurin 1 |
|  | SRPX2 | sushi repeat containing protein X-linked 2 |

**Supplementary Table 3.** Different DEGs in IgAN and LN compared with HC and common DEGs of IgAN and LN compared with HC with the same or the opposite alterative trend.

DEG = Differentially Expressed Gene; IgAN = Immunoglobulin A Nephropathy; LN = Lupus Nephritis; HC = Healthy control.

| IgAN-salmon module | | LN-red module | | LN-green module | |
| --- | --- | --- | --- | --- | --- |
| Gene | Gene significance | Gene | Gene significance | Gene | Gene significance |
| RARG | 0.6171 | HERC5 | 0.8101 | SH3BGRL | 0.6376 |
| RAX | 0.5622 | HERC6 | 0.8034 | UBA3 | 0.6021 |
| PRLH | 0.5347 | MX1 | 0.7996 | GCA | 0.5955 |
| WNT10B | 0.4725 | OAS2 | 0.7943 | PAQR3 | 0.5889 |
| LLGL1 | 0.4724 | IFI44 | 0.7895 | CEBPG | 0.5867 |
|  |  | MX2 | 0.7702 | VPS4B | 0.5803 |
|  |  | EIF2AK2 | 0.7674 | YRDC | 0.5738 |
|  |  | IFI44L | 0.7671 | SMNDC1 | 0.5678 |
|  |  | IFI6 | 0.7590 | MICU2 | 0.5654 |
|  |  | IFIH1 | 0.7571 | CASP7 | 0.5602 |
|  |  | ISG20 | 0.7456 | NRAS | 0.5586 |
|  |  | IFIT1 | 0.7428 | PRPF18 | 0.5581 |
|  |  | OAS1 | 0.7317 | PDHX | 0.5568 |
|  |  | PLSCR1 | 0.7286 | RAP2C | 0.5430 |
|  |  | OAS3 | 0.7278 | ZZZ3 | 0.5345 |
|  |  | PARP12 | 0.7216 | UBE2A | 0.5226 |
|  |  | XAF1 | 0.7204 | ACTR3 | 0.5117 |
|  |  | RSAD2 | 0.7149 | EFR3A | 0.5004 |
|  |  | DDX60 | 0.7118 | CDC73 | 0.4887 |
|  |  | IFIT5 | 0.7007 | DHX29 | 0.4847 |
|  |  | SP110 | 0.6986 | KIN | 0.4828 |
|  |  | LAP3 | 0.6977 | HAT1 | 0.4795 |
|  |  | TRIM21 | 0.6920 | PPP2R3C | 0.4781 |
|  |  | RTP4 | 0.6918 | EIF4E | 0.4669 |
|  |  | SP100 | 0.6867 | SPART | 0.4600 |
|  |  | IFIT2 | 0.6845 | CDKN2AIP | 0.4508 |
|  |  | TRIM22 | 0.6840 | RPAP3 | 0.4145 |
|  |  | DDX58 | 0.6814 |  |  |
|  |  | PHF11 | 0.6684 |  |  |
|  |  | NMI | 0.6652 |  |  |
|  |  | UBE2L6 | 0.6570 |  |  |
|  |  | OASL | 0.6465 |  |  |
|  |  | IFIT3 | 0.6402 |  |  |
|  |  | STAT1 | 0.6291 |  |  |
|  |  | ADAR | 0.6070 |  |  |
|  |  | SAMD9 | 0.5903 |  |  |
|  |  | SHFL | 0.5501 |  |  |
|  |  | TMEM140 | 0.5332 |  |  |

**Supplementary Table 4.** DEGs mostly correlated to IgAN and LN.

DEG = Differentially Expressed Genes; IgAN = Immunoglobulin A Nephropathy; LN = Lupus Nephritis

| module | Ontology | ID | Description | Adj. p value | Count | geneID |
| --- | --- | --- | --- | --- | --- | --- |
| IgAN associated salmon module | BP | GO:0007399 | nervous system development | 0.014326295 | 5 | RARG/PRLH/RAX/WNT10B/LLGL1 |
|  | BP | GO:0007423 | sensory organ development | 0.030521742 | 3 | RARG/RAX/WNT10B |
|  | BP | GO:0002062 | chondrocyte differentiation | 0.030521742 | 2 | RARG/WNT10B |
|  | BP | GO:0032526 | response to retinoic acid | 0.030521742 | 2 | RARG/WNT10B |
|  | BP | GO:0048589 | developmental growth | 0.030521742 | 3 | RARG/PRLH/WNT10B |
|  | BP | GO:0035264 | multicellular organism growth | 0.030521742 | 2 | RARG/PRLH |
|  | BP | GO:0048736 | appendage development | 0.030521742 | 2 | RARG/RAX |
|  | BP | GO:0060173 | limb development | 0.030521742 | 2 | RARG/RAX |
|  | BP | GO:0006367 | transcription initiation from RNA polymerase II promoter | 0.030521742 | 2 | RARG/WNT10B |
|  | BP | GO:0051216 | cartilage development | 0.030521742 | 2 | RARG/WNT10B |
|  | CC | - | - | - | - | - |
|  | MF | GO:0046965 | retinoid X receptor binding | 0.041438734 | 1 | RARG |
|  | MF | GO:0005102 | signaling receptor binding | 0.041438734 | 3 | RARG/PRLH/WNT10B |
|  | MF | GO:0048018 | receptor ligand activity | 0.041438734 | 2 | PRLH/WNT10B |
|  | MF | GO:0098772 | molecular function regulator | 0.041438734 | 3 | PRLH/WNT10B/LLGL1 |
|  | MF | GO:0030545 | receptor regulator activity | 0.041438734 | 2 | PRLH/WNT10B |
|  | MF | GO:0005184 | neuropeptide hormone activity | 0.041438734 | 1 | PRLH |
|  | MF | GO:0071855 | neuropeptide receptor binding | 0.041438734 | 1 | PRLH |
|  | MF | GO:0042974 | retinoic acid receptor binding | 0.041438734 | 1 | RARG |
| LN associated red module | BP | GO:0009615 | response to virus | 3.64E-35 | 26 | IFIT1/HERC5/EIF2AK2/OAS1/OAS2/IFIT2/IFI44/RTP4/IFIH1/IFI44L/MX1/IFIT5/TRIM22/MX2/RSAD2/IFI6/DDX58/IFIT3/OAS3/STAT1/ISG20/OASL/DDX60/PLSCR1/ADAR/SHFL |
|  | BP | GO:0051607 | defense response to virus | 1.16E-32 | 23 | IFIT1/HERC5/EIF2AK2/OAS1/OAS2/RTP4/IFIH1/IFI44L/MX1/IFIT5/TRIM22/MX2/RSAD2/IFI6/DDX58/OAS3/STAT1/ISG20/OASL/DDX60/PLSCR1/ADAR/SHFL |
|  | BP | GO:0034340 | response to type I interferon | 1.24E-27 | 17 | IFIT1/OAS1/OAS2/IFIT2/SP100/MX1/XAF1/MX2/RSAD2/IFI6/IFIT3/OAS3/STAT1/ISG20/OASL/ADAR/SHFL |
|  | BP | GO:0045087 | innate immune response | 5.29E-26 | 27 | IFIT1/HERC5/TRIM21/EIF2AK2/OAS1/OAS2/IFIT2/IFIH1/SP100/MX1/XAF1/IFIT5/TRIM22/MX2/RSAD2/IFI6/DDX58/IFIT3/OAS3/STAT1/ISG20/OASL/NMI/DDX60/PLSCR1/ADAR/SHFL |
|  | BP | GO:0060337 | type I interferon signaling pathway | 5.29E-26 | 16 | IFIT1/OAS1/OAS2/IFIT2/SP100/MX1/XAF1/MX2/RSAD2/IFI6/IFIT3/OAS3/STAT1/ISG20/OASL/ADAR |
|  | BP | GO:0071357 | cellular response to type I interferon | 5.29E-26 | 16 | IFIT1/OAS1/OAS2/IFIT2/SP100/MX1/XAF1/MX2/RSAD2/IFI6/IFIT3/OAS3/STAT1/ISG20/OASL/ADAR |
|  | BP | GO:0051707 | response to other organism | 5.29E-26 | 27 | IFIT1/HERC5/HERC6/EIF2AK2/OAS1/OAS2/IFIT2/IFI44/RTP4/IFIH1/IFI44L/MX1/IFIT5/TRIM22/MX2/RSAD2/IFI6/DDX58/IFIT3/OAS3/STAT1/ISG20/OASL/DDX60/PLSCR1/ADAR/SHFL |
|  | BP | GO:0043207 | response to external biotic stimulus | 5.29E-26 | 27 | IFIT1/HERC5/HERC6/EIF2AK2/OAS1/OAS2/IFIT2/IFI44/RTP4/IFIH1/IFI44L/MX1/IFIT5/TRIM22/MX2/RSAD2/IFI6/DDX58/IFIT3/OAS3/STAT1/ISG20/OASL/DDX60/PLSCR1/ADAR/SHFL |
|  | BP | GO:0098542 | defense response to other organism | 8.31E-26 | 23 | IFIT1/HERC5/EIF2AK2/OAS1/OAS2/RTP4/IFIH1/IFI44L/MX1/IFIT5/TRIM22/MX2/RSAD2/IFI6/DDX58/OAS3/STAT1/ISG20/OASL/DDX60/PLSCR1/ADAR/SHFL |
|  | BP | GO:0009607 | response to biotic stimulus | 1.11E-25 | 27 | IFIT1/HERC5/HERC6/EIF2AK2/OAS1/OAS2/IFIT2/IFI44/RTP4/IFIH1/IFI44L/MX1/IFIT5/TRIM22/MX2/RSAD2/IFI6/DDX58/IFIT3/OAS3/STAT1/ISG20/OASL/DDX60/PLSCR1/ADAR/SHFL |
|  | CC | GO:0005829 | cytosol | 8.42E-06 | 26 | IFIT1/HERC5/TRIM21/HERC6/EIF2AK2/OAS1/OAS2/IFIT2/IFIH1/MX1/XAF1/IFIT5/TRIM22/MX2/DDX58/IFIT3/SAMD9/OAS3/STAT1/LAP3/OASL/NMI/DDX60/UBE2L6/PLSCR1/SHFL |
|  | MF | GO:0003725 | double-stranded RNA binding | 1.19E-10 | 8 | EIF2AK2/OAS1/OAS2/IFIH1/DDX58/OAS3/OASL/DDX60 |
|  | MF | GO:0001730 | 2'-5'-oligoadenylate synthetase activity | 8.02E-07 | 3 | OAS1/OAS2/OAS3 |
|  | MF | GO:0003723 | RNA binding | 4.24E-06 | 17 | IFIT1/HERC5/TRIM21/EIF2AK2/OAS1/OAS2/IFIT2/IFIH1/IFIT5/DDX58/OAS3/ISG20/OASL/DDX60/PARP12/ADAR/SHFL |
|  | MF | GO:0003676 | nucleic acid binding | 0.000473898 | 21 | IFIT1/HERC5/TRIM21/EIF2AK2/OAS1/OAS2/IFIT2/IFIH1/SP100/IFIT5/DDX58/OAS3/STAT1/ISG20/OASL/DDX60/PARP12/SP110/PLSCR1/ADAR/SHFL |
|  | MF | GO:0003727 | single-stranded RNA binding | 0.000473898 | 4 | IFIH1/IFIT5/DDX58/DDX60 |
|  | MF | GO:0070566 | adenylyltransferase activity | 0.000671348 | 3 | OAS1/OAS2/OAS3 |
|  | MF | GO:0035639 | purine ribonucleoside triphosphate binding | 0.019909011 | 11 | EIF2AK2/OAS1/OAS2/IFIH1/IFI44L/MX1/MX2/DDX58/OAS3/OASL/DDX60 |
|  | MF | GO:0032555 | purine ribonucleotide binding | 0.019909011 | 11 | EIF2AK2/OAS1/OAS2/IFIH1/IFI44L/MX1/MX2/DDX58/OAS3/OASL/DDX60 |
|  | MF | GO:0017076 | purine nucleotide binding | 0.019909011 | 11 | EIF2AK2/OAS1/OAS2/IFIH1/IFI44L/MX1/MX2/DDX58/OAS3/OASL/DDX60 |
|  | MF | GO:0032553 | ribonucleotide binding | 0.019909011 | 11 | EIF2AK2/OAS1/OAS2/IFIH1/IFI44L/MX1/MX2/DDX58/OAS3/OASL/DDX60 |

**Supplementary Table 5.** GO analysis results of DEGs mostly correlated to IgAN and LN in the associated modules (significant enrichment with top 10 terms in maximum of each category were listed).

GO=Gene ontology; DEG = Differentially Expressed Genes; IgAN=Immunoglobulin A nephropathy; LN=lupus nephritis.

| ID | Description | Adj. p value | Count | geneID |
| --- | --- | --- | --- | --- |
| hsa05164 | Influenza A | 4.37E-12 | 10 | EIF2AK2/OAS1/OAS2/IFIH1/MX1/RSAD2/DDX58/OAS3/STAT1/ADAR |
| hsa05162 | Measles | 2.25E-11 | 9 | EIF2AK2/OAS1/OAS2/IFIH1/MX1/DDX58/OAS3/STAT1/ADAR |
| hsa05160 | Hepatitis C | 4.33E-11 | 9 | IFIT1/EIF2AK2/OAS1/OAS2/MX1/RSAD2/DDX58/OAS3/STAT1 |
| hsa05169 | Epstein-Barr virus infection | 1.30E-05 | 6 | EIF2AK2/OAS1/OAS2/DDX58/OAS3/STAT1 |
| hsa05168 | Herpes simplex virus 1 infection | 1.30E-05 | 8 | EIF2AK2/OAS1/OAS2/IFIH1/SP100/DDX58/OAS3/STAT1 |
| hsa04621 | NOD-like receptor signaling pathway | 0.002459699 | 4 | OAS1/OAS2/OAS3/STAT1 |
| hsa05165 | Human papillomavirus infection | 0.018409857 | 4 | EIF2AK2/MX1/STAT1/OASL |
| hsa05161 | Hepatitis B | 0.018409857 | 3 | IFIH1/DDX58/STAT1 |
| hsa04623 | Cytosolic DNA-sensing pathway | 0.029410272 | 2 | DDX58/ADAR |
| hsa04622 | RIG-I-like receptor signaling pathway | 0.03246242 | 2 | IFIH1/DDX58 |

**Supplementary Table 6.** KEGG analysis results of DEGs mostly correlated to LN in the “red” module.

KEGG= Kyoto Encylopaedia of Genes and Genomes; LN=lupus nephritis.

| Immune cell type | Group | Group | Wilcox test | Kruskal-Wallis rank sum test |
| --- | --- | --- | --- | --- |
| B_cells_naive | IgAN(0.06±0.08) | LN(0.04±0.07) | 0.16 | 0.36 |
| IgAN(0.06±0.08) | HC(0.05±0.07) | 0.62 |
| LN(0.04±0.07) | HC(0.05±0.07) | 0.39 |
| B_cells_memory | IgAN(0.04±0.06) | LN(0.03±0.07) | 0.48 | 0.76 |
| IgAN(0.04±0.06) | HC(0.06±0.11) | 0.67 |
| LN(0.03±0.07) | HC(0.06±0.11) | 0.77 |
| Plasma_cells | IgAN(0.04±0.09) | LN(0.07±0.11) | 0.24 | 0.46 |
| IgAN(0.04±0.09) | HC(0.04±0.07) | 0.79 |
| LN(0.07±0.11) | HC(0.04±0.07) | 0.43 |
| T_cells_CD8 | IgAN(0.07±0.09) | LN(0.05±0.09) | 0.63 | 0.82 |
| IgAN(0.07±0.09) | HC(0.06±0.09) | 0.55 |
| LN(0.05±0.09) | HC(0.06±0.09) | 0.93 |
| T_cells_CD4_naive | IgAN(0.10±0.10) | LN(0.04±0.06) | 0.02 | 0.03 |
| IgAN(0.10±0.10) | HC(0.04±0.05) | 0.03 |
| LN(0.04±0.06) | HC(0.04±0.05) | 0.94 |
| T_cells_CD4_memory_resting | IgAN(0.03±0.05) | LN(0.05±0.10) | 0.21 | 0.38 |
| IgAN(0.03±0.05) | HC(0.05±0.08) | 0.25 |
| LN(0.05±0.10) | HC(0.05±0.08) | 1 |
| T_cells_CD4_memory_activated | IgAN(0.03±0.04) | LN(0.04±0.05) | 0.39 | 0.68 |
| IgAN(0.03±0.04) | HC(0.05±0.09) | 0.78 |
| LN(0.04±0.05) | HC(0.05±0.09) | 0.62 |
| T_cells_follicular_helper | IgAN(0.02±0.04) | LN(0.03±0.03) | 0.02 | 0.05 |
| IgAN(0.02±0.04) | HC(0.04±0.05) | 0.05 |
| LN(0.03±0.03) | HC(0.04±0.05) | 0.92 |
| T_cells_regulatory_(Tregs) | IgAN(0.07±0.08) | LN(0.01±0.05) | 5.20E-05 | 1.90E-04 |
| IgAN(0.07±0.08) | HC(0.04±0.08) | 0.02 |
| LN(0.01±0.05) | HC(0.04±0.08) | 0.17 |
| T_cells_gamma_delta | IgAN(0.03±0.05) | LN(0.05±0.06) | 0.01 | 0.04 |
| IgAN(0.03±0.05) | HC(0.04±0.05) | 0.4 |
| LN(0.05±0.06) | HC(0.04±0.05) | 0.14 |
| NK_cells_resting | IgAN(0.04±0.06) | LN(0.02±0.03) | 0.22 | 0.45 |
| IgAN(0.04±0.06) | HC(0.02±0.06) | 0.38 |
| LN(0.02±0.03) | HC(0.02±0.06) | 0.97 |
| NK_cells_activated | IgAN(0.02±0.04) | LN(0.04±0.04) | 3.50E-03 | 0.01 |
| IgAN(0.02±0.04) | HC(0.04±0.08) | 0.18 |
| LN(0.04±0.04) | HC(0.04±0.08) | 0.2 |
| Monocytes | IgAN(0.10±0.12) | LN(0.12±0.14) | 0.71 | 0.21 |
| IgAN(0.10±0.12) | HC(0.06±0.10) | 0.18 |
| LN(0.12±0.14) | HC(0.06±0.10) | 0.09 |
| Macrophages_M0 | IgAN(0.06±0.09) | LN(0.01±0.03) | 5.30E-03 | 0.01 |
| IgAN(0.06±0.09) | HC(0.07±0.11) | 0.97 |
| LN(0.01±0.03) | HC(0.07±0.11) | 0.01 |
| Macrophages_M1 | IgAN(0.03±0.04) | LN(0.03±0.04) | 0.44 | 0.71 |
| IgAN(0.03±0.04) | HC(0.03±0.05) | 0.66 |
| LN(0.03±0.04) | HC(0.03±0.05) | 0.68 |
| Macrophages_M2 | IgAN(0.05±0.08) | LN(0.14±0.14) | 5.20E-04 | 1.50E-05 |
| IgAN(0.05±0.08) | HC(0.02±0.05) | 0.59 |
| LN(0.14±0.14) | HC(0.02±0.05) | 2.00E-05 |
| Dendritic_cells_resting | IgAN(0.04±0.05) | LN(0.02±0.02) | 0.04 | 0.1 |
| IgAN(0.04±0.05) | HC(0.05±0.06) | 0.92 |
| LN(0.02±0.02) | HC(0.05±0.06) | 0.12 |
| Dendritic_cells_activated | IgAN(0.01±0.03) | LN(0.03±0.04) | 1.80E-03 | 6.50E-03 |
| IgAN(0.01±0.03) | HC(0.02±0.04) | 0.33 |
| LN(0.03±0.04) | HC(0.02±0.04) | 0.07 |
| Mast_cells_resting | IgAN(0.04±0.09) | LN(0.03±0.05) | 0.44 | 0.05 |
| IgAN(0.04±0.09) | HC(0.08±0.09) | 0.03 |
| LN(0.03±0.05) | HC(0.08±0.09) | 0.05 |
| Mast_cells_activated | IgAN(0.07±0.08) | LN(0.06±0.07) | 0.26 | 0.12 |
| IgAN(0.07±0.08) | HC(0.06±0.10) | 0.04 |
| LN(0.06±0.07) | HC(0.06±0.10) | 0.32 |
| Eosinophils | IgAN(0.02±0.03) | LN(0.04±0.05) | 0.01 | 0.06 |
| IgAN(0.02±0.03) | HC(0.05±0.07) | 0.11 |
| LN(0.04±0.05) | HC(0.05±0.07) | 0.77 |
| Neutrophils | IgAN(0.04±0.08) | LN(0.05±0.07) | 0.1 | 0.25 |
| IgAN(0.04±0.08) | HC(0.05±0.07) | 0.37 |
| LN(0.05±0.07) | HC(0.05±0.07) | 0.52 |
|  |  |  |  |  |

**Supplementary Table 7.** Result of immune infiltration analysis for IgAN and LN.

IgAN=Immunoglobulin A nephropathy; LN=lupus nephritis; HC=Healthy Control.


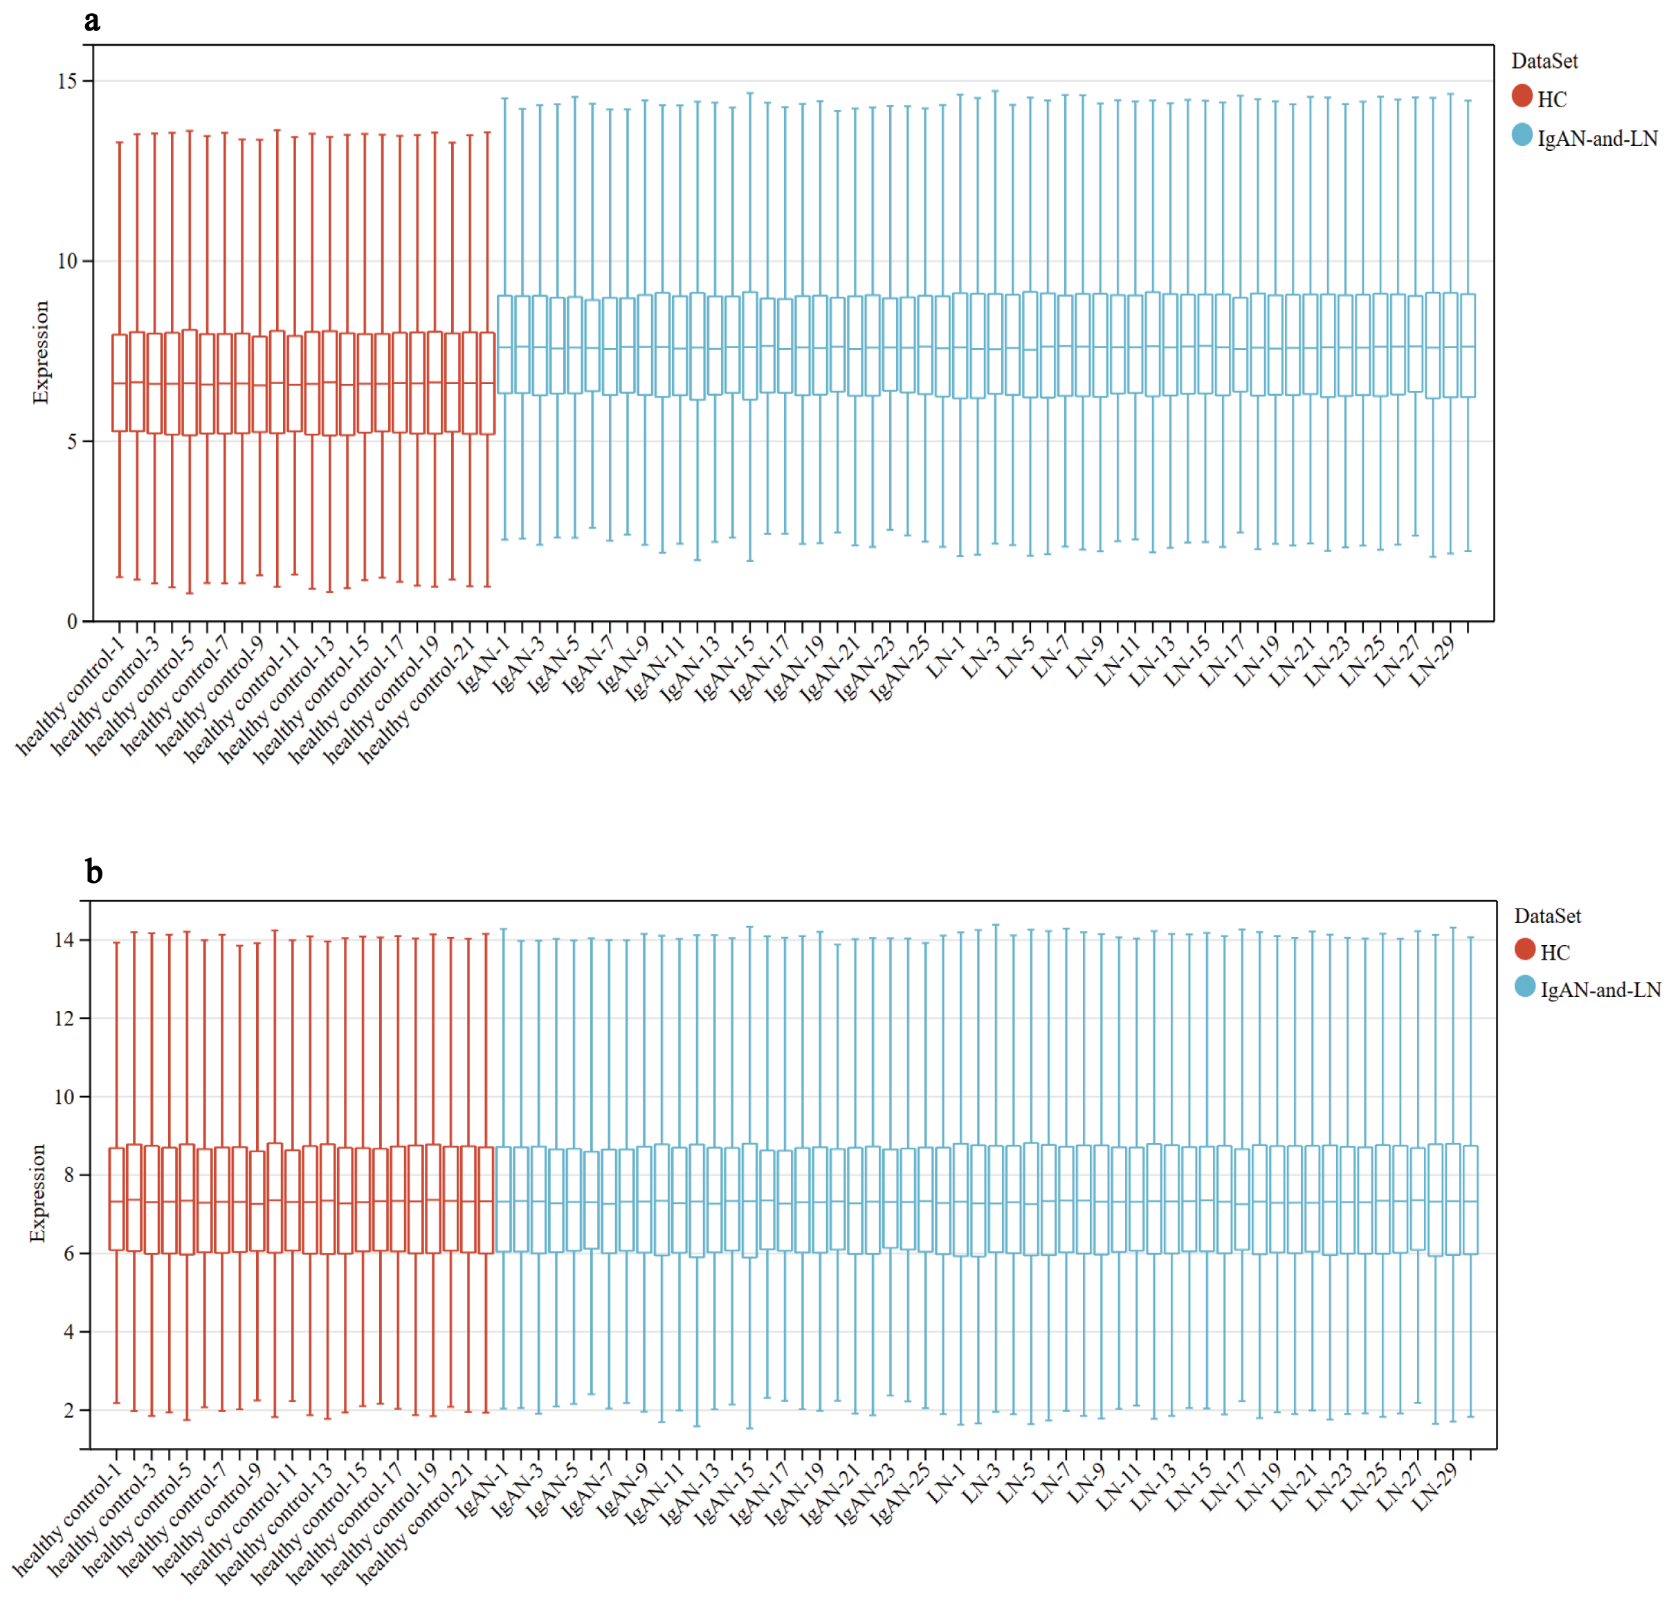


**Supplementary Figure 1.** Integration of gene expression data of HC, IgAN patients and LN patients from GSE99339 and GSE93798 datasets. **a** Integrated gene expression data before removal of batch effect; **b** Integrated gene expression data after removal of batch effect.

HC=healthy control; IgAN=Immunoglobulin A nephropathy; LN=Lupus nephritis.


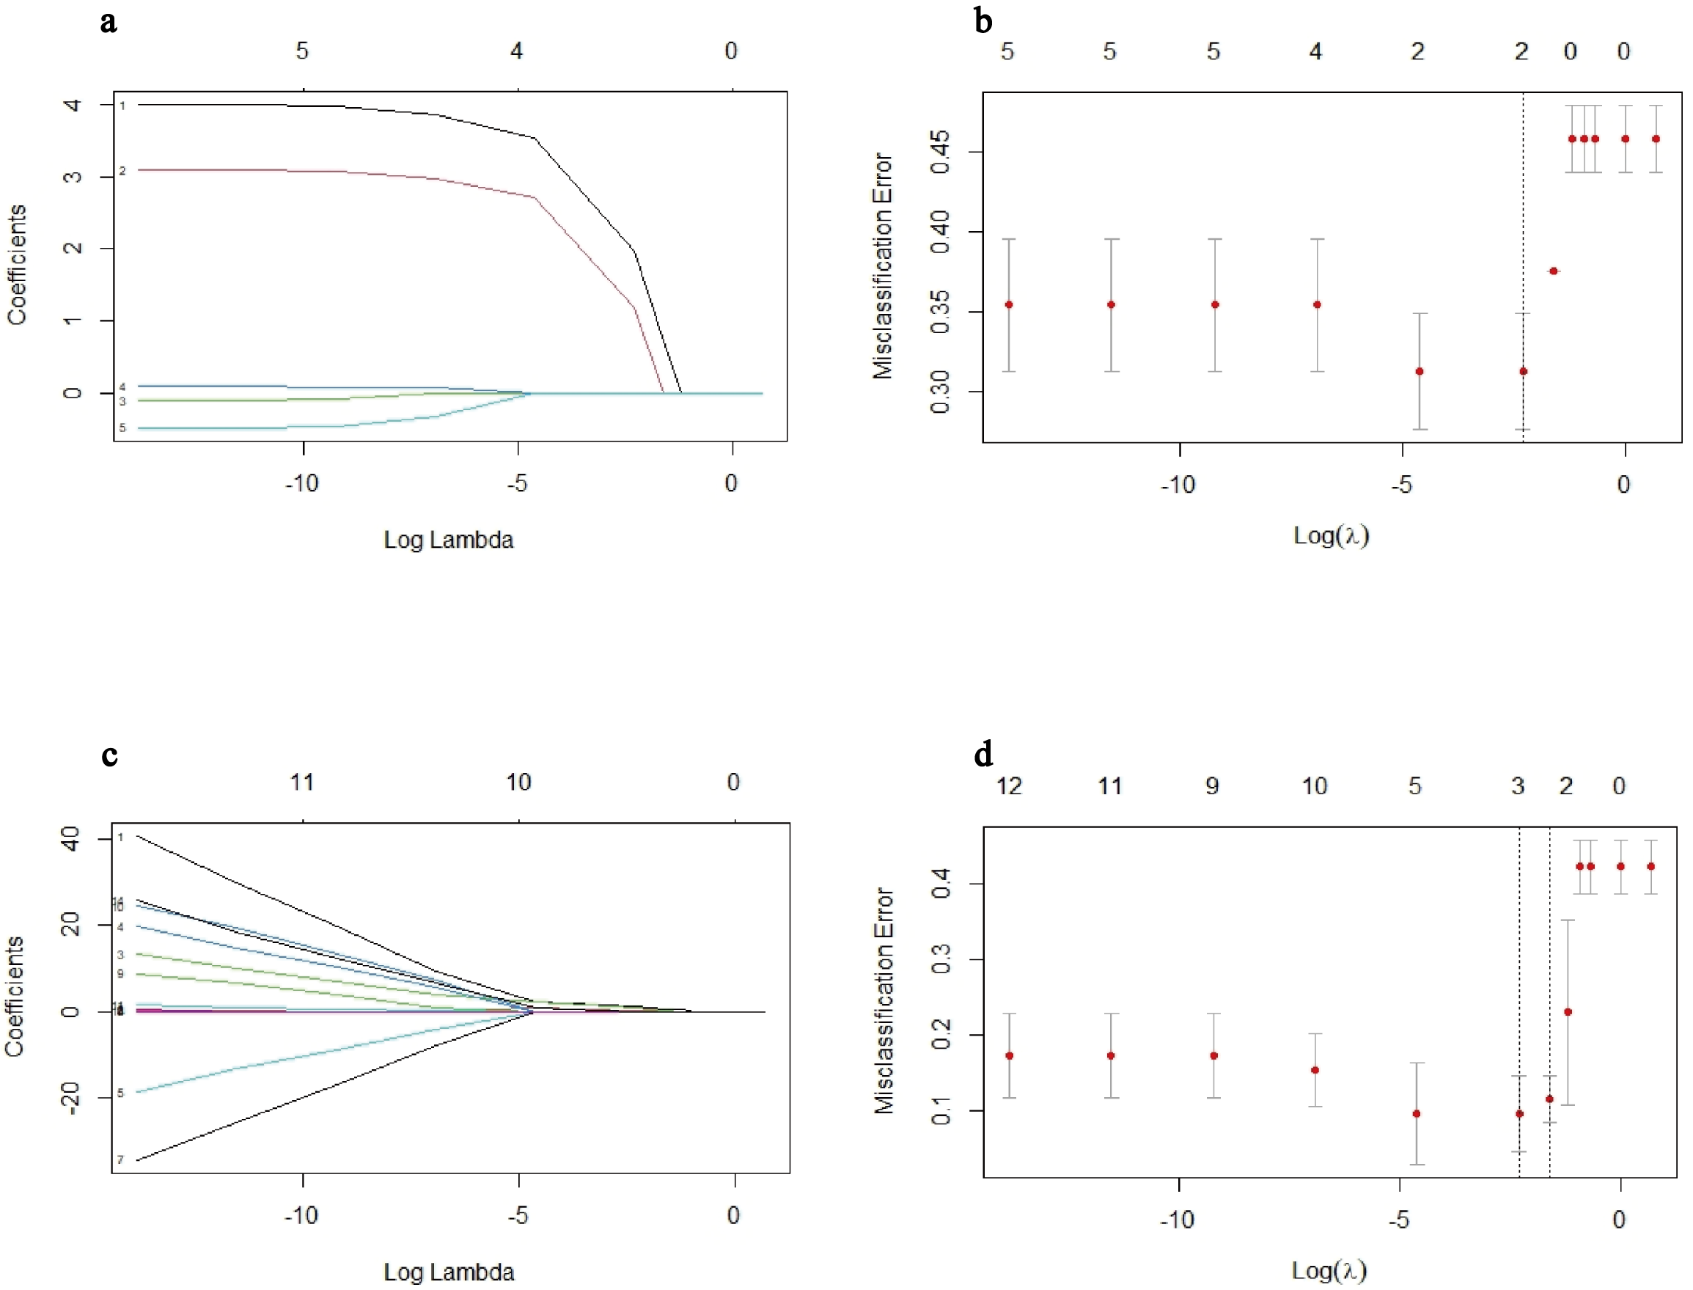


**Supplementary Figure 2.** Feature selection using the LASSO regression analysis for IgAN and LN. **a** LASSO coefficient profiles of the 5 DEGs mostly correlated to IgAN. **b** Tuning parameter (λ) selection in the LASSO model for IgAN used 10-fold cross-testing via minimum criteria. **c** LASSO coefficient profiles of the 15 DEGs mostly correlated to LN. **d** Tuning parameter (λ) selection in the LASSO model for LN used 10-fold cross-testing via minimum criteria.

LASSO=least absolute shrinkage and selection operator; DEG=Differentially Expressed Gene; IgAN=Immunoglobulin A nephropathy; LN=Lupus nephritis.


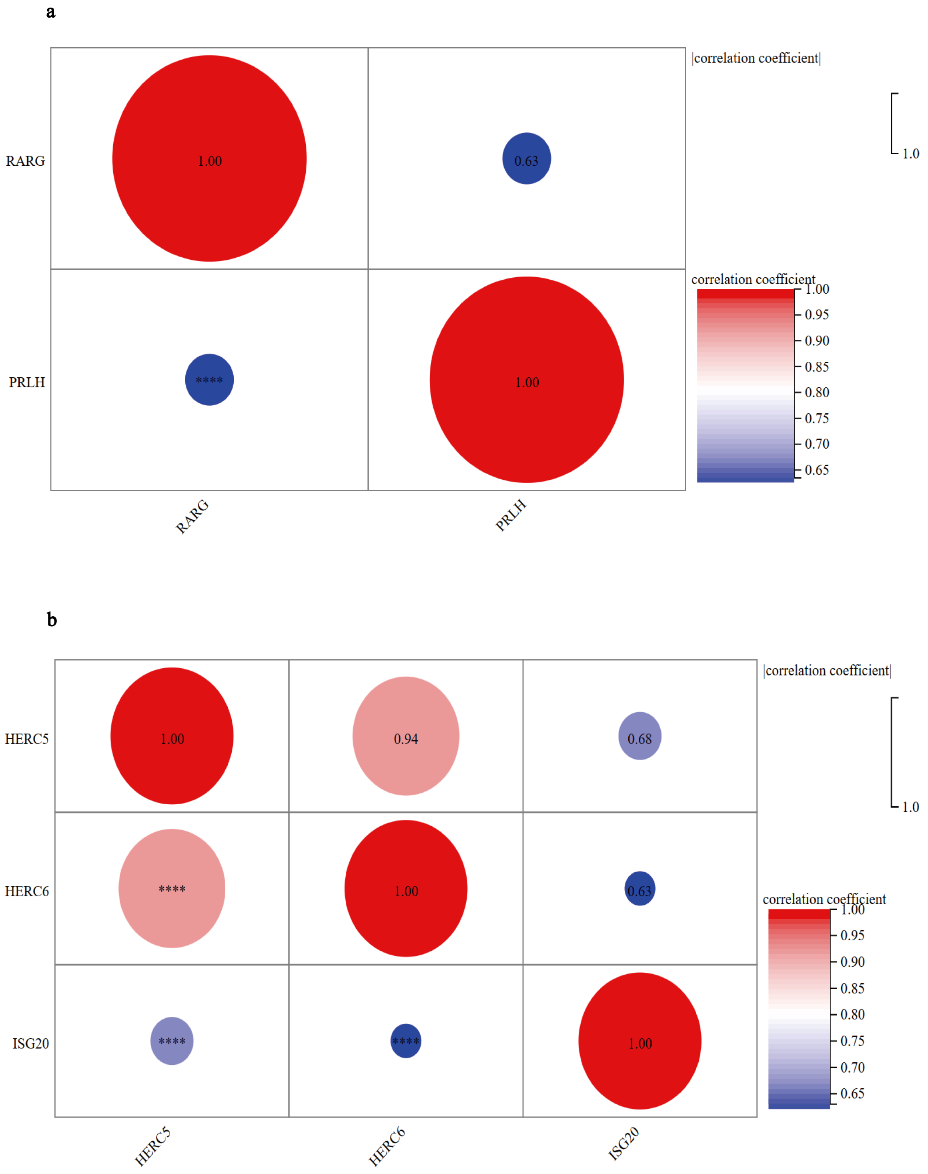


**Supplementary Figure 3.** Multicollinearity analysis among features selected by LASSO regression analysis for IgAN and LN. **a** Multicollinearity analysis between RARG and PRLH to predict IgAN; **b** Multicollinearity analysis among HERC5, HERC6 and ISG20 to predict LN.

LASSO=least absolute shrinkage and selection operator; IgAN=Immunoglobulin A nephropathy; LN=Lupus nephritis.


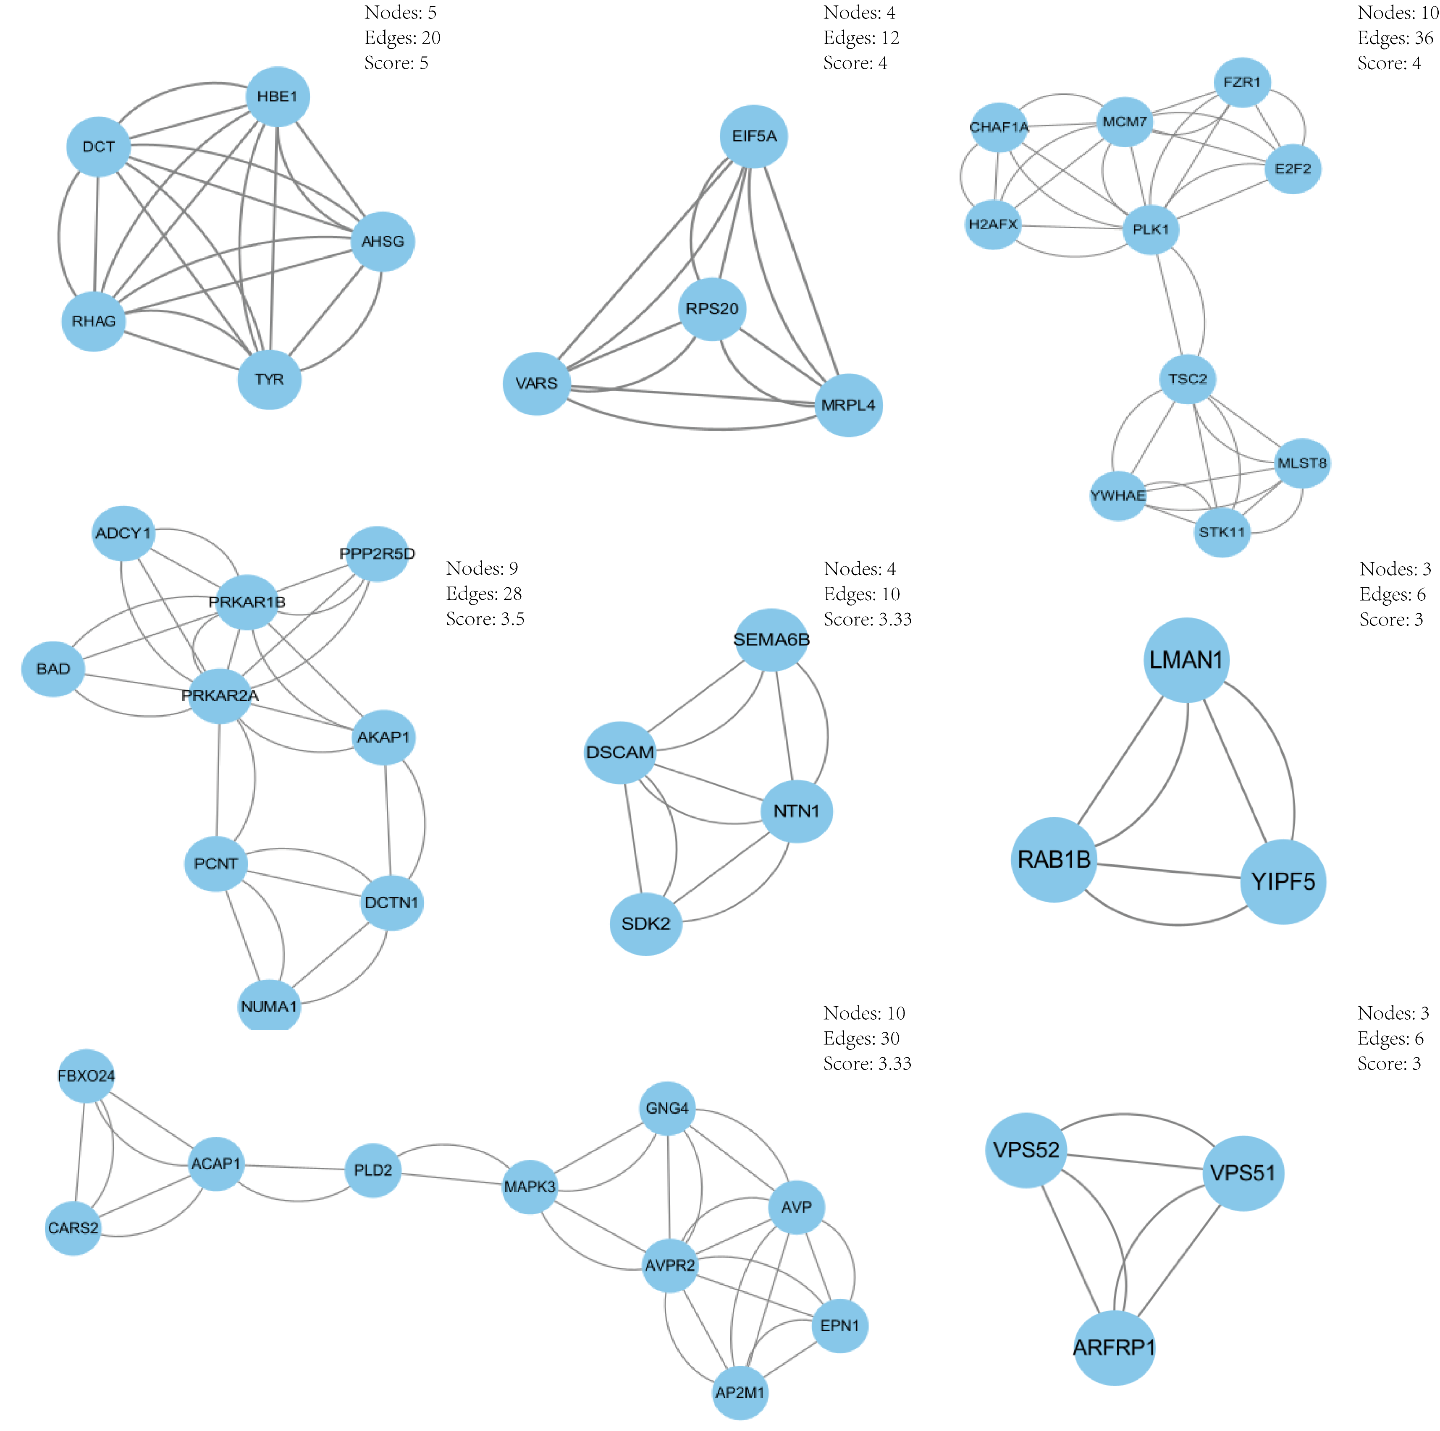


**Supplementary Figure 4.** Siginificant clustering modules for IgAN by MCODE based on up-regulated DEGs in IgAN in the common DEGs with opposite alterative trend in IgAN and LN.

MCODE=Molecular Complex Detection Technology; DEG= Differentially Expressed Genes; IgAN=Immunoglobulin A nephropathy; LN=lupus nephritis.


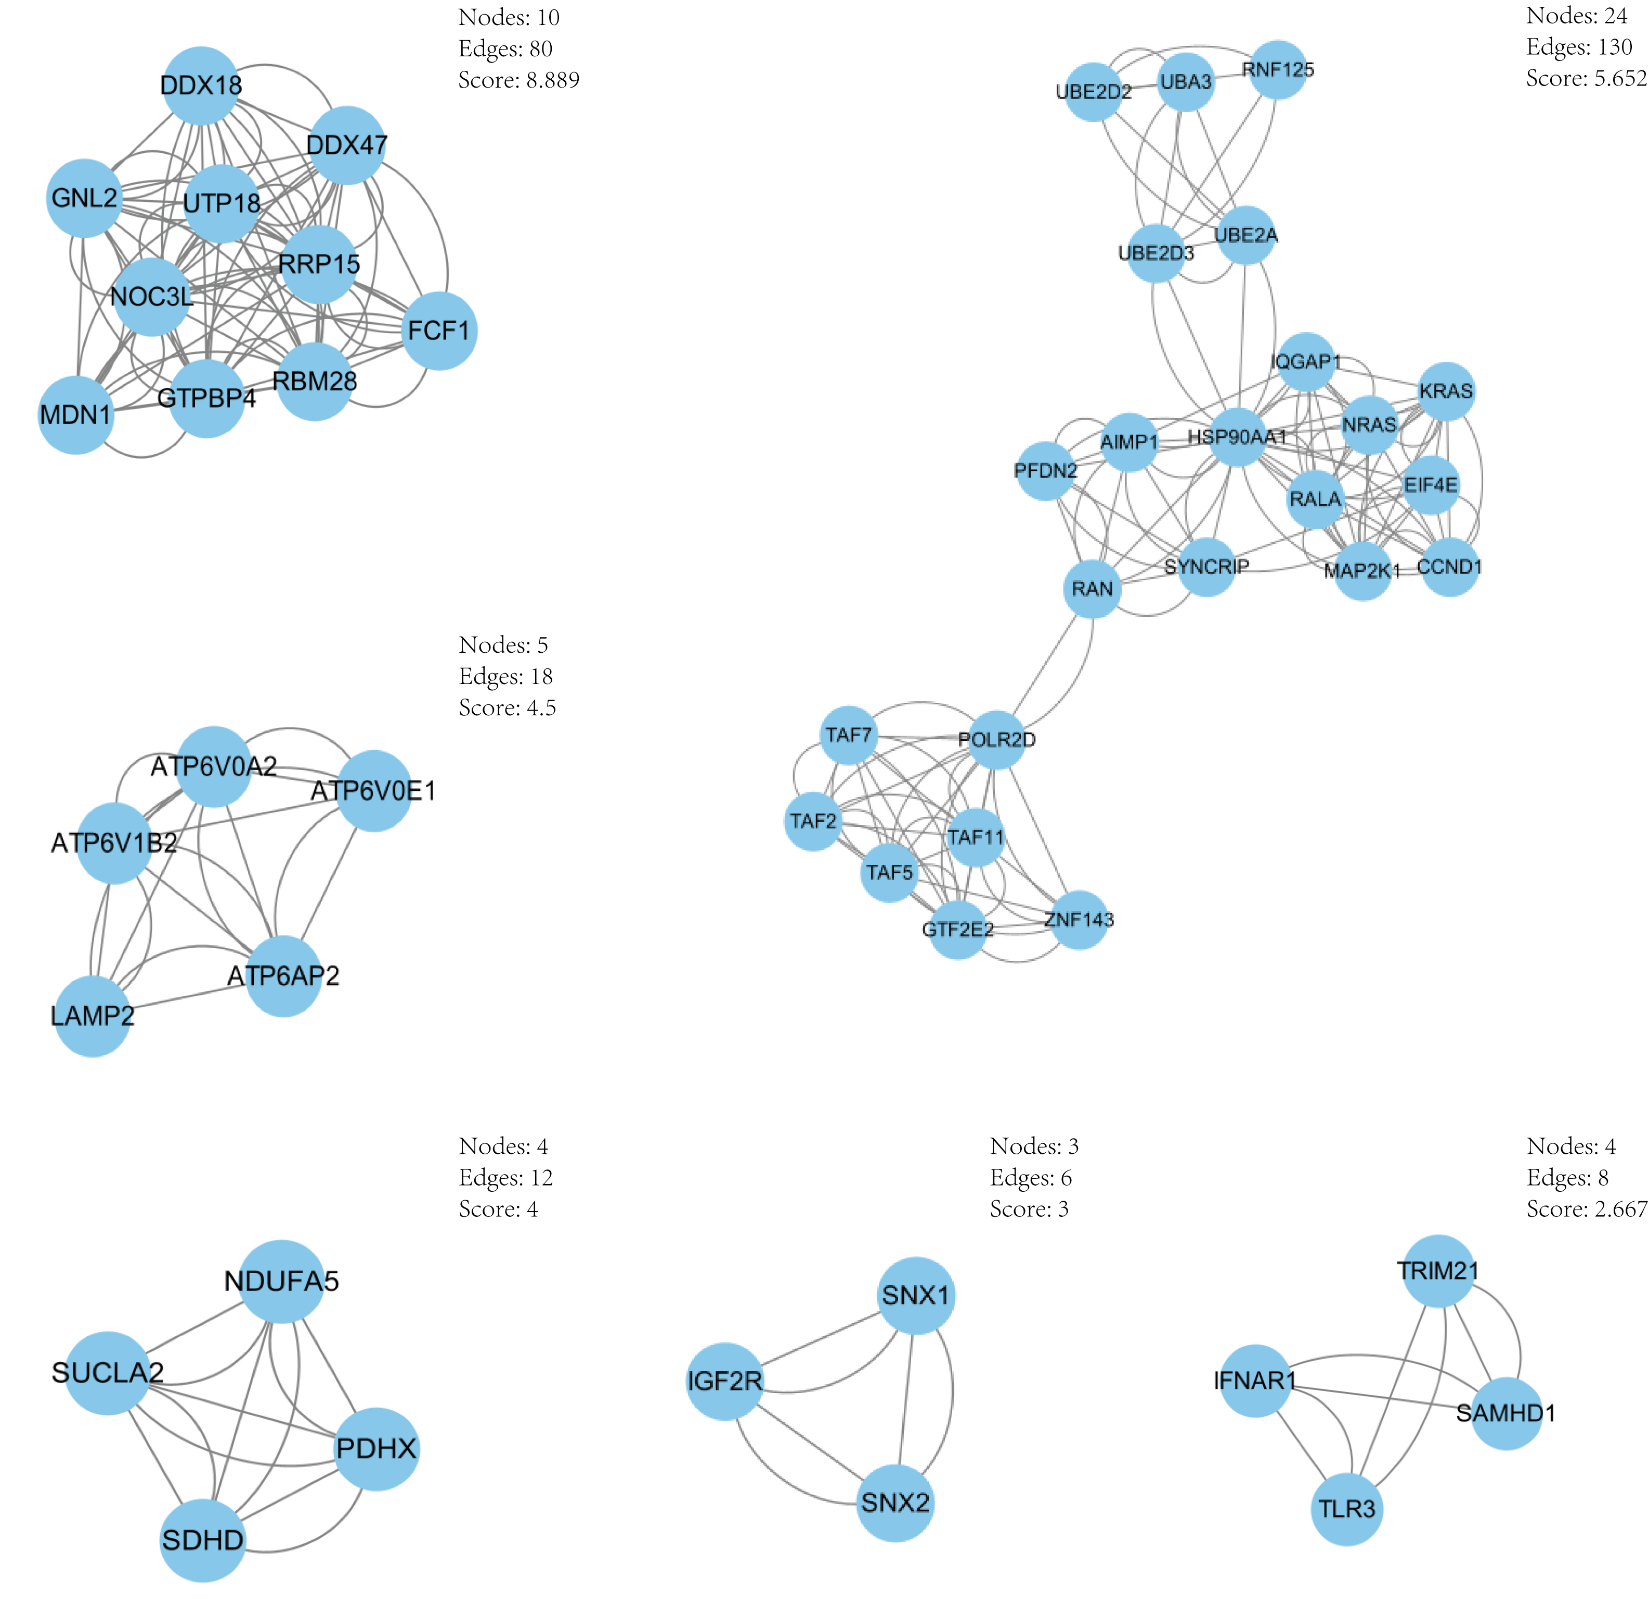


**Supplementary Figure 5.** Siginificant clustering modules for LN by MCODE based on up-regulated DEGs in LN in the common DEGs with opposite alterative trend in IgAN and LN.

MCODE=Molecular Complex Detection Technology; DEG= Differentially Expressed Genes; IgAN=Immunoglobulin A nephropathy; LN=lupus nephritis.


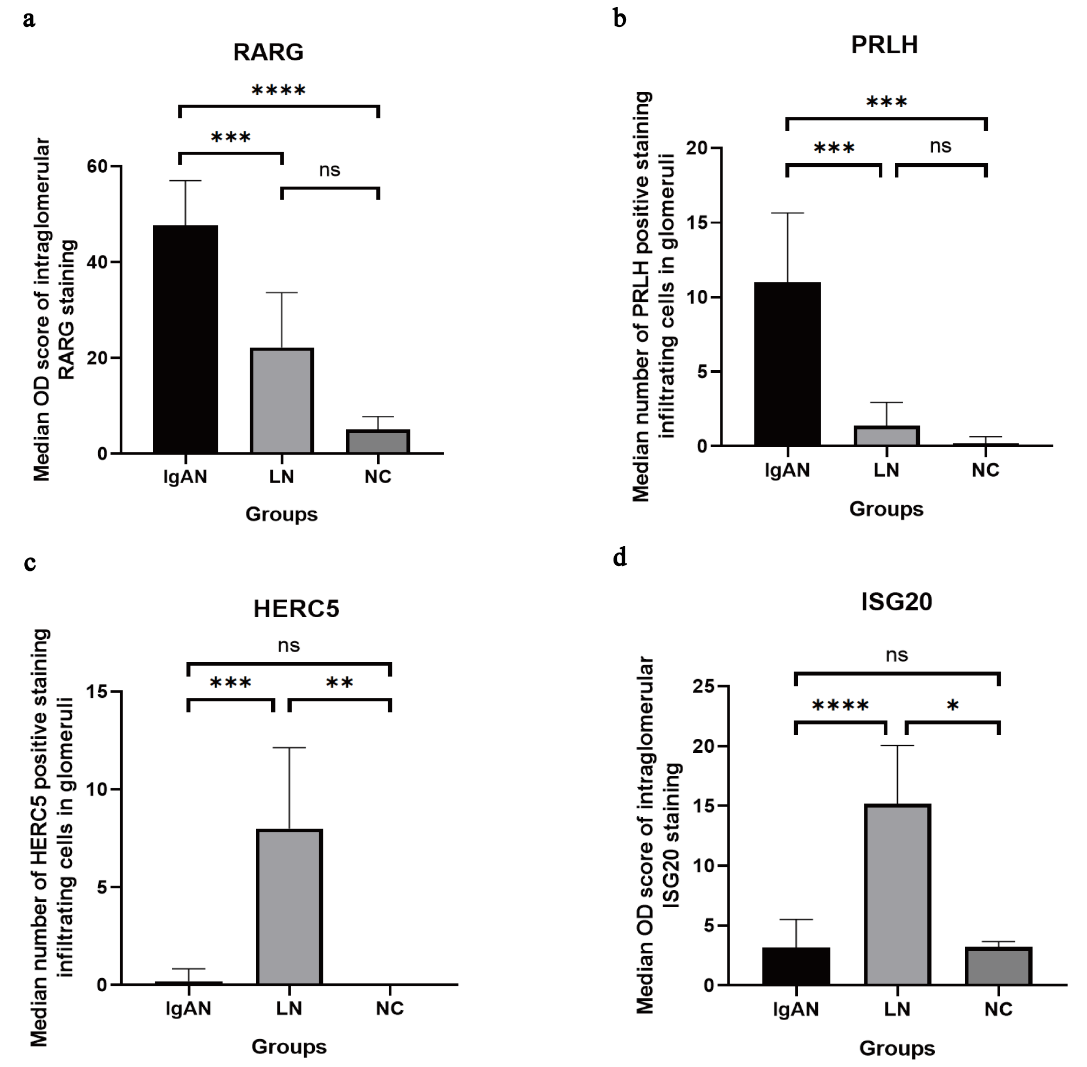


**Supplementary Figure 6.** Nonparametric results for RARG, PRLH, HERC5 and ISG20 staining in IgAN and LN patients and HCs.

OD=Optical Density; RARG=Retinoic Acid Receptor γ; PRLH=Prolactin Releasing Hormone; HERC5= HECT domain and RCC1-like domain-containing protein 5; ISG20= Interferon Stimulated exonuclease Gene 20; IgAN=Immunoglobulin A nephropathy; LN=lupus nephritis; HC=Healthy Control


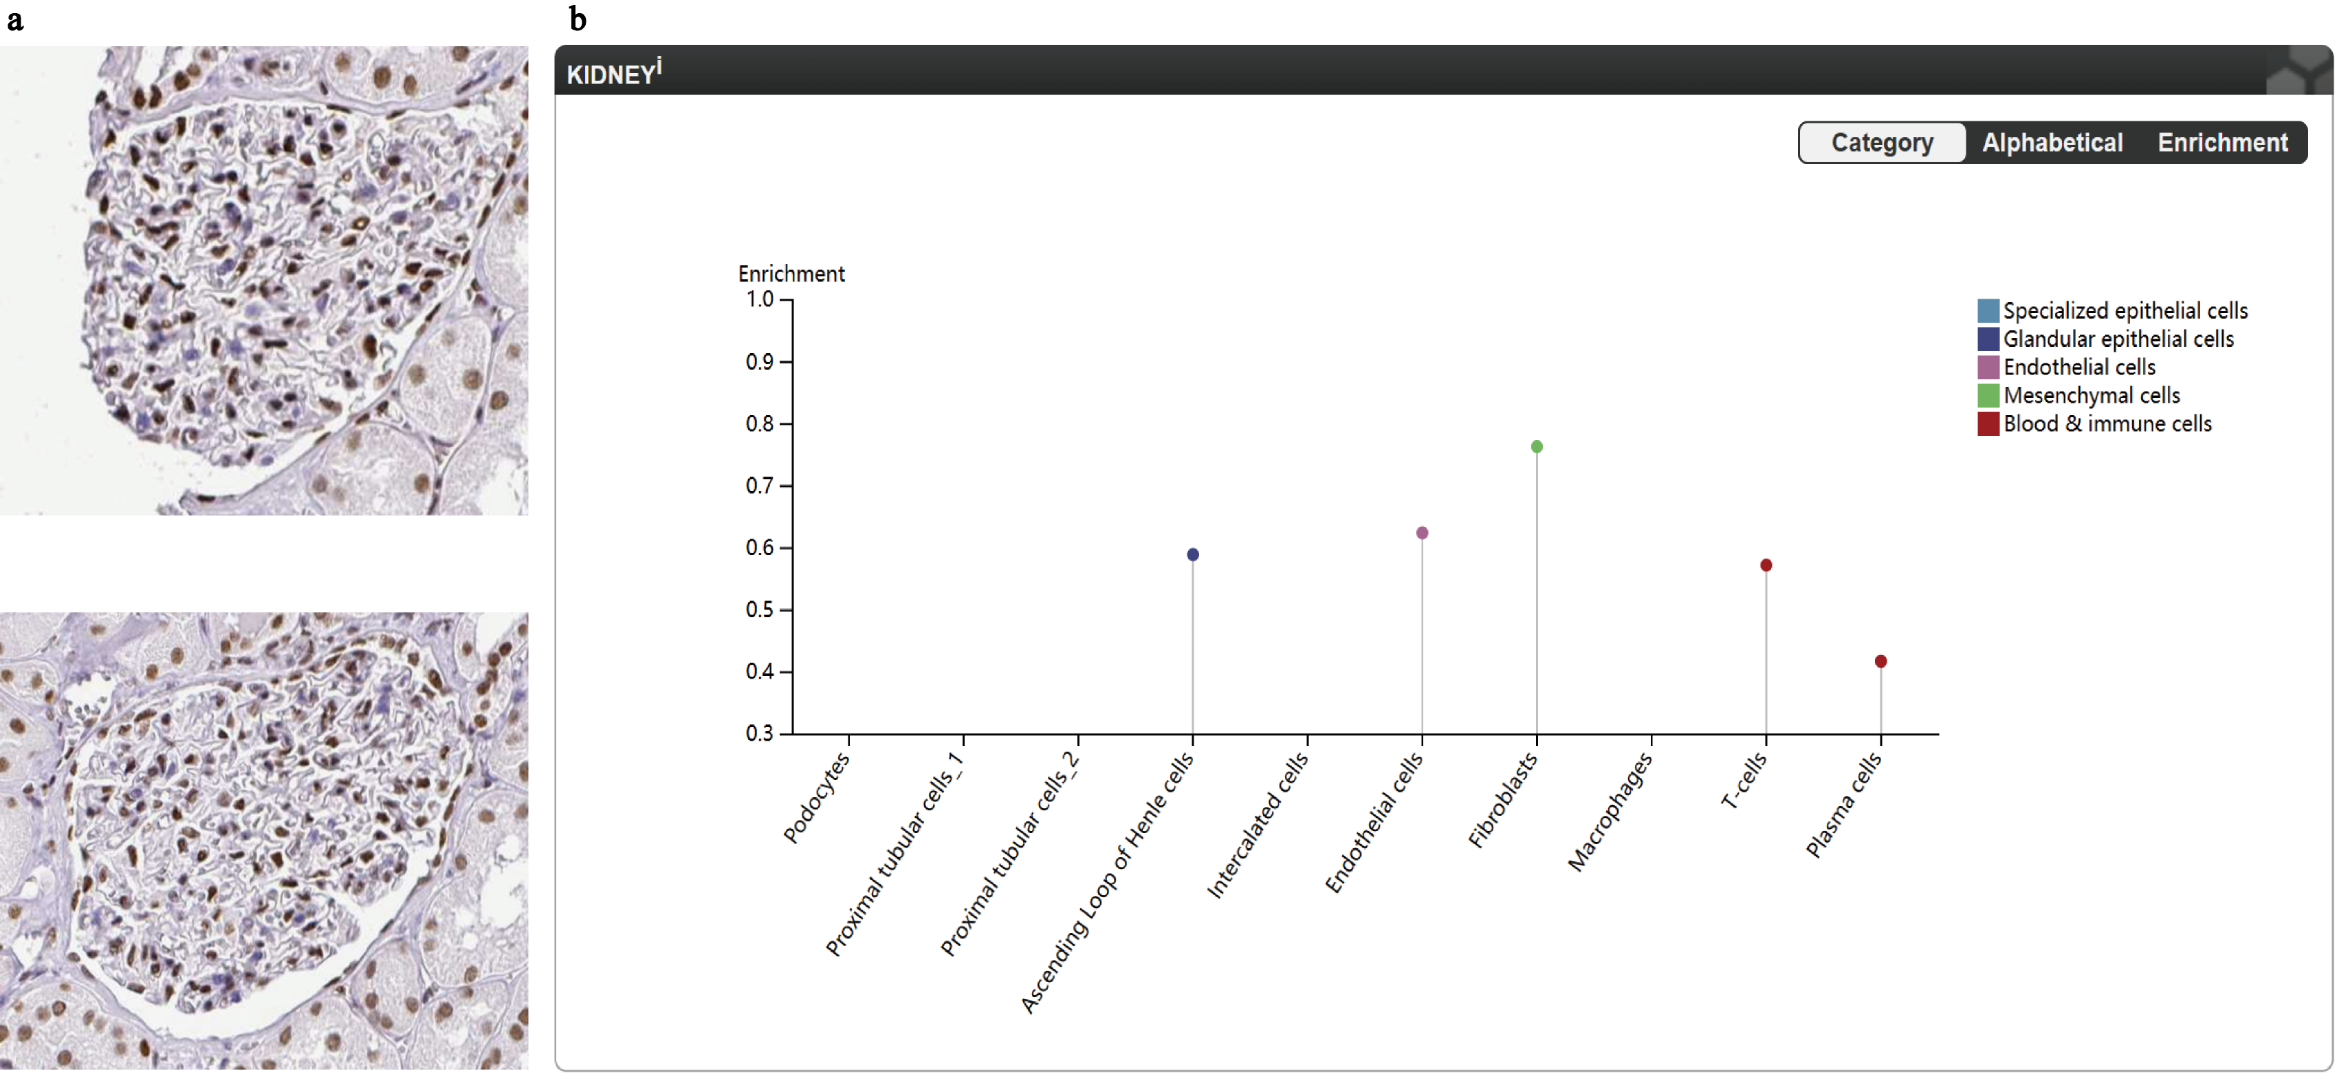


**Supplementary Figure 7.** RARG expression in kidney tissue of healthy individuals from the Human Protein Atlas database. **a** RARG expression in the glomerular compartment. **b** Enrichment of RARG expression in different categories of cells in the kidney tissue.

RARG=Retinoic Acid Receptor γ
